# Supplementary material for: Stage-specific expression of an odorant receptor underlies olfactory behavioral plasticity in Spodoptera littoralis larvae
Source: PubMed Central journal article supplement (PMC8555055; doi:10.1186/s12915-021-01159-1), 2021-10-28

OR1 Control Slit\_1 Slit\_4 Slit\_♂ Slit\_♀

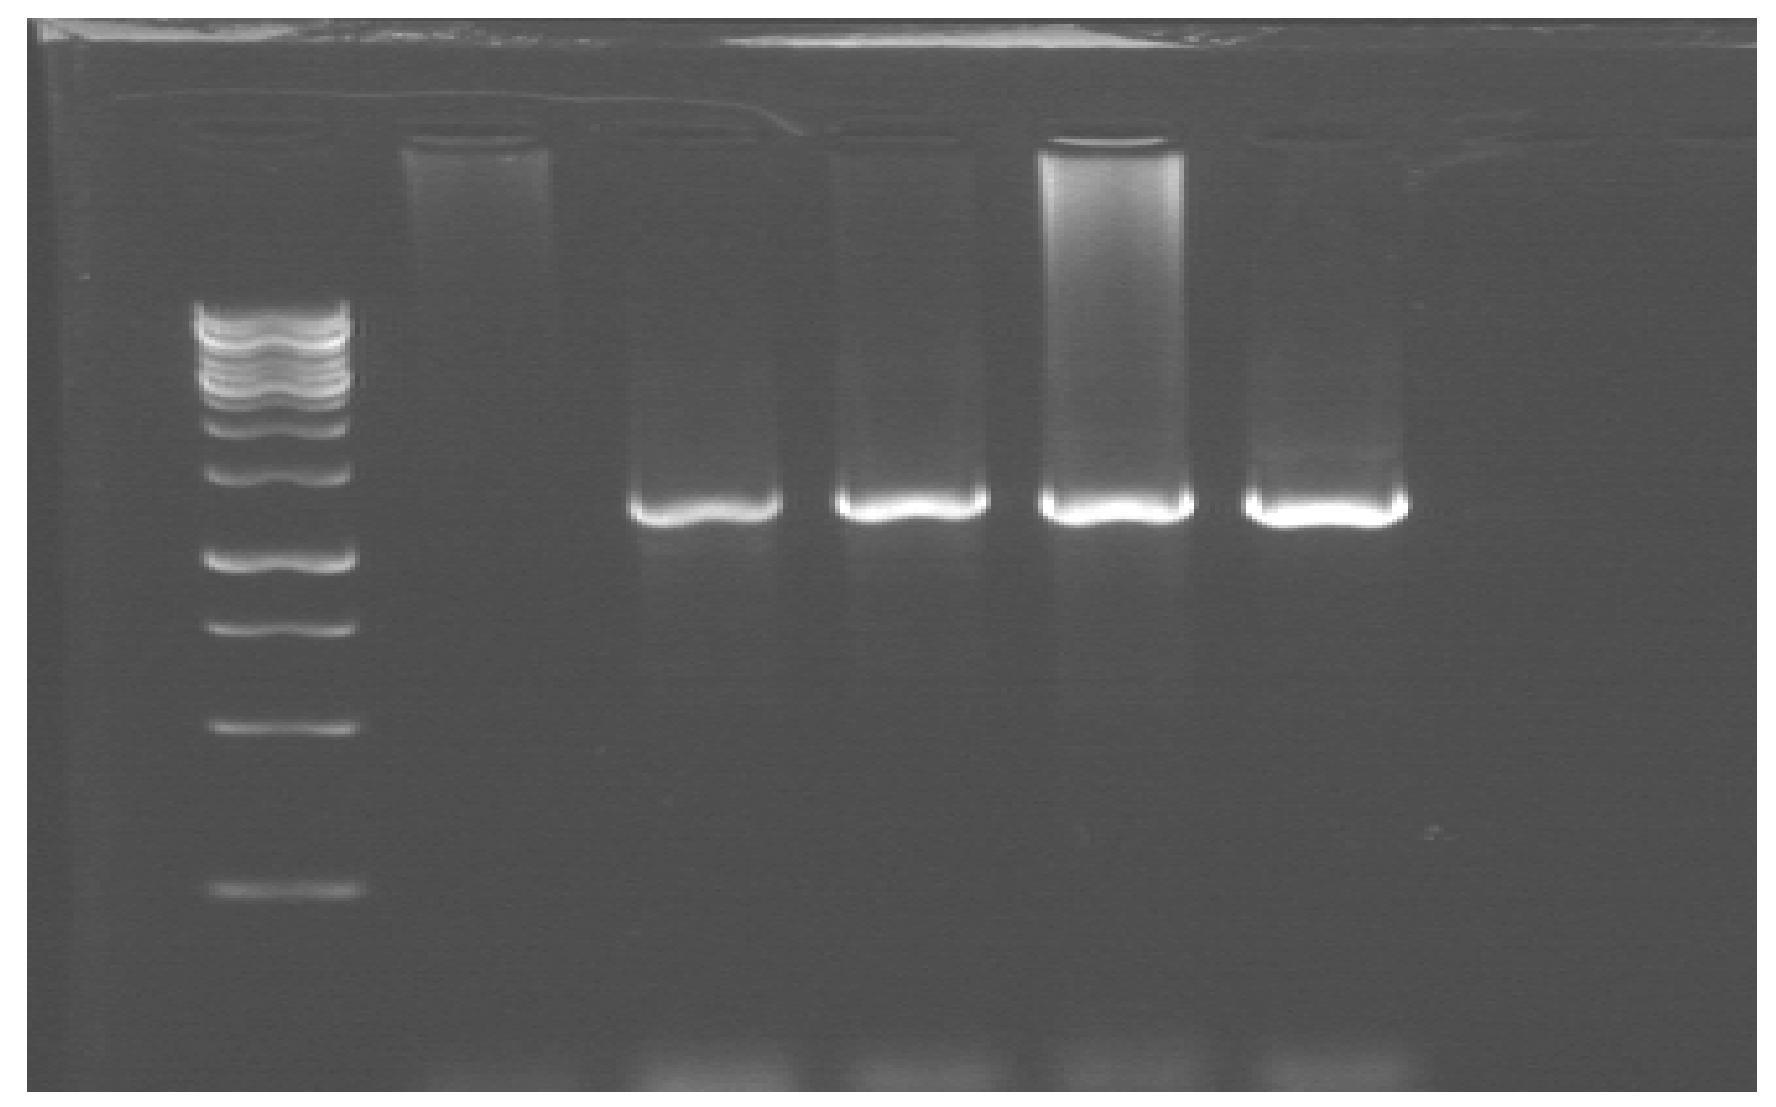

OR12 Control Slit\_1 Slit\_4 Slit\_♂ Slit\_♀

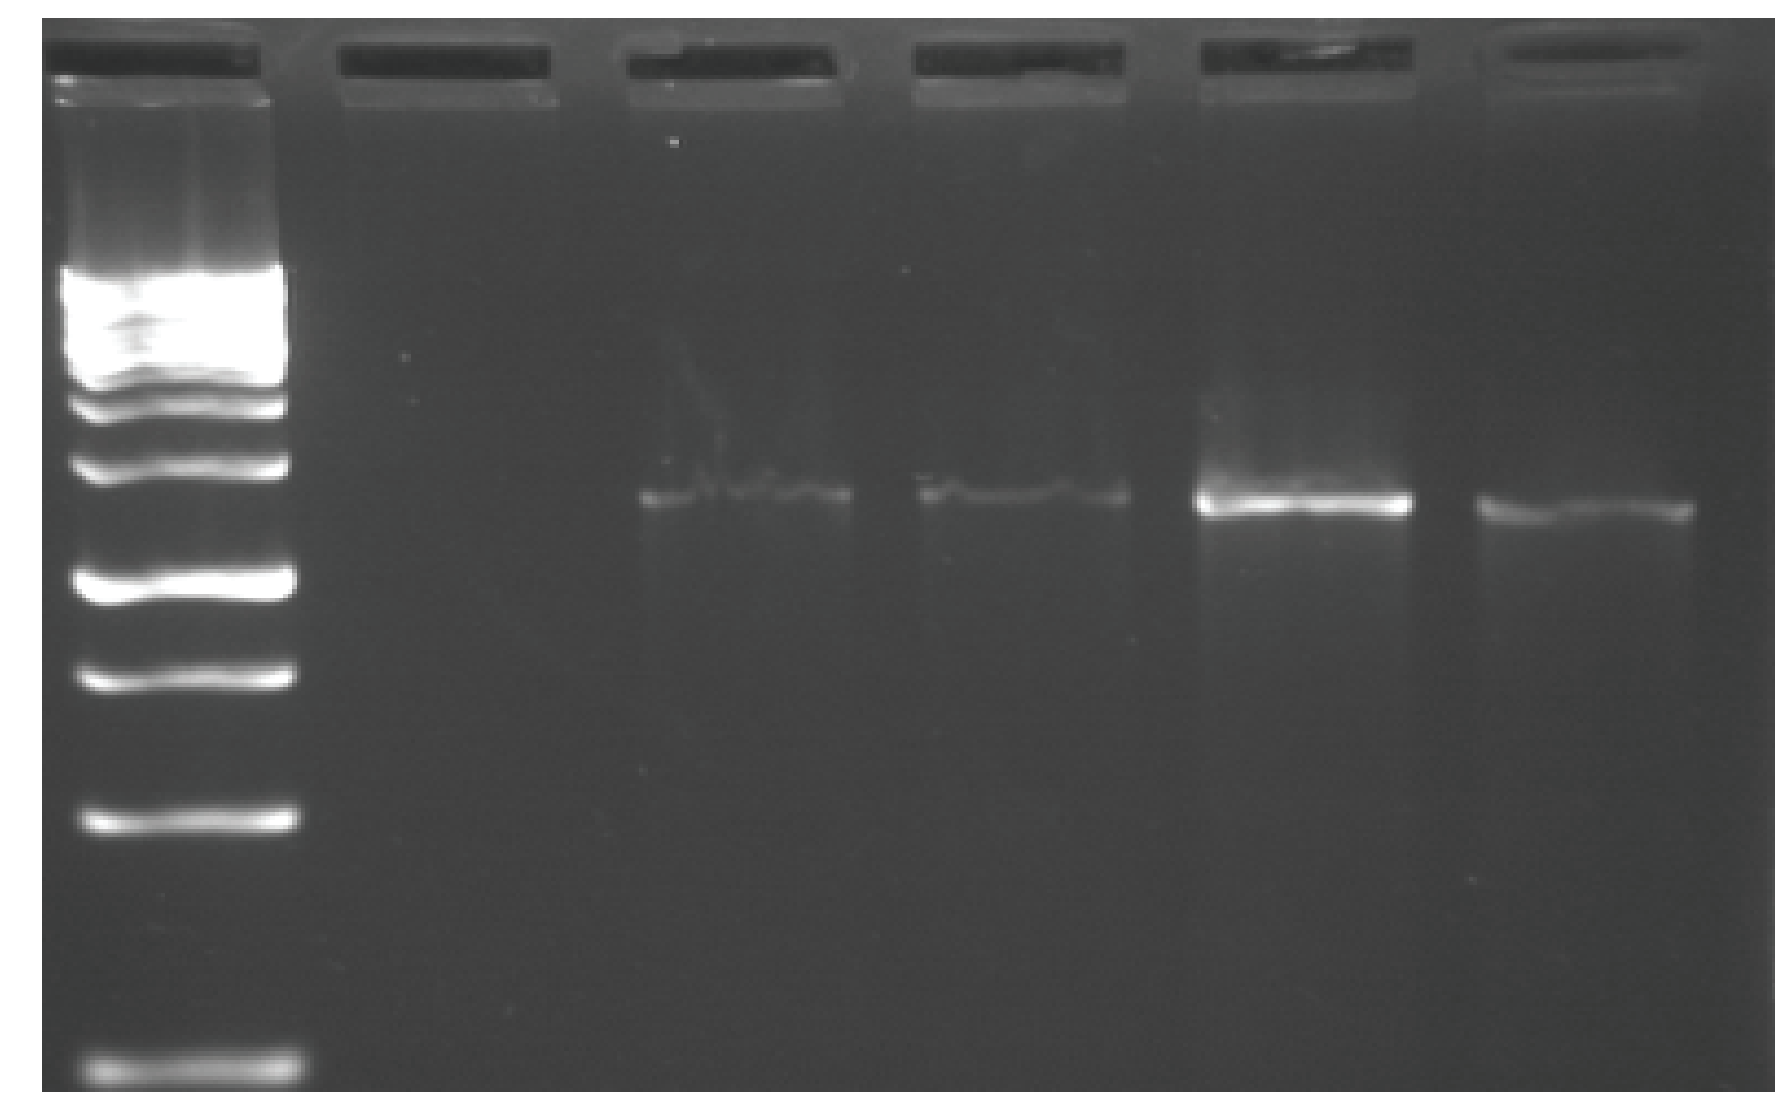

OR20 Control Slit\_1 Slit\_4 Slit\_♂ Slit\_♀

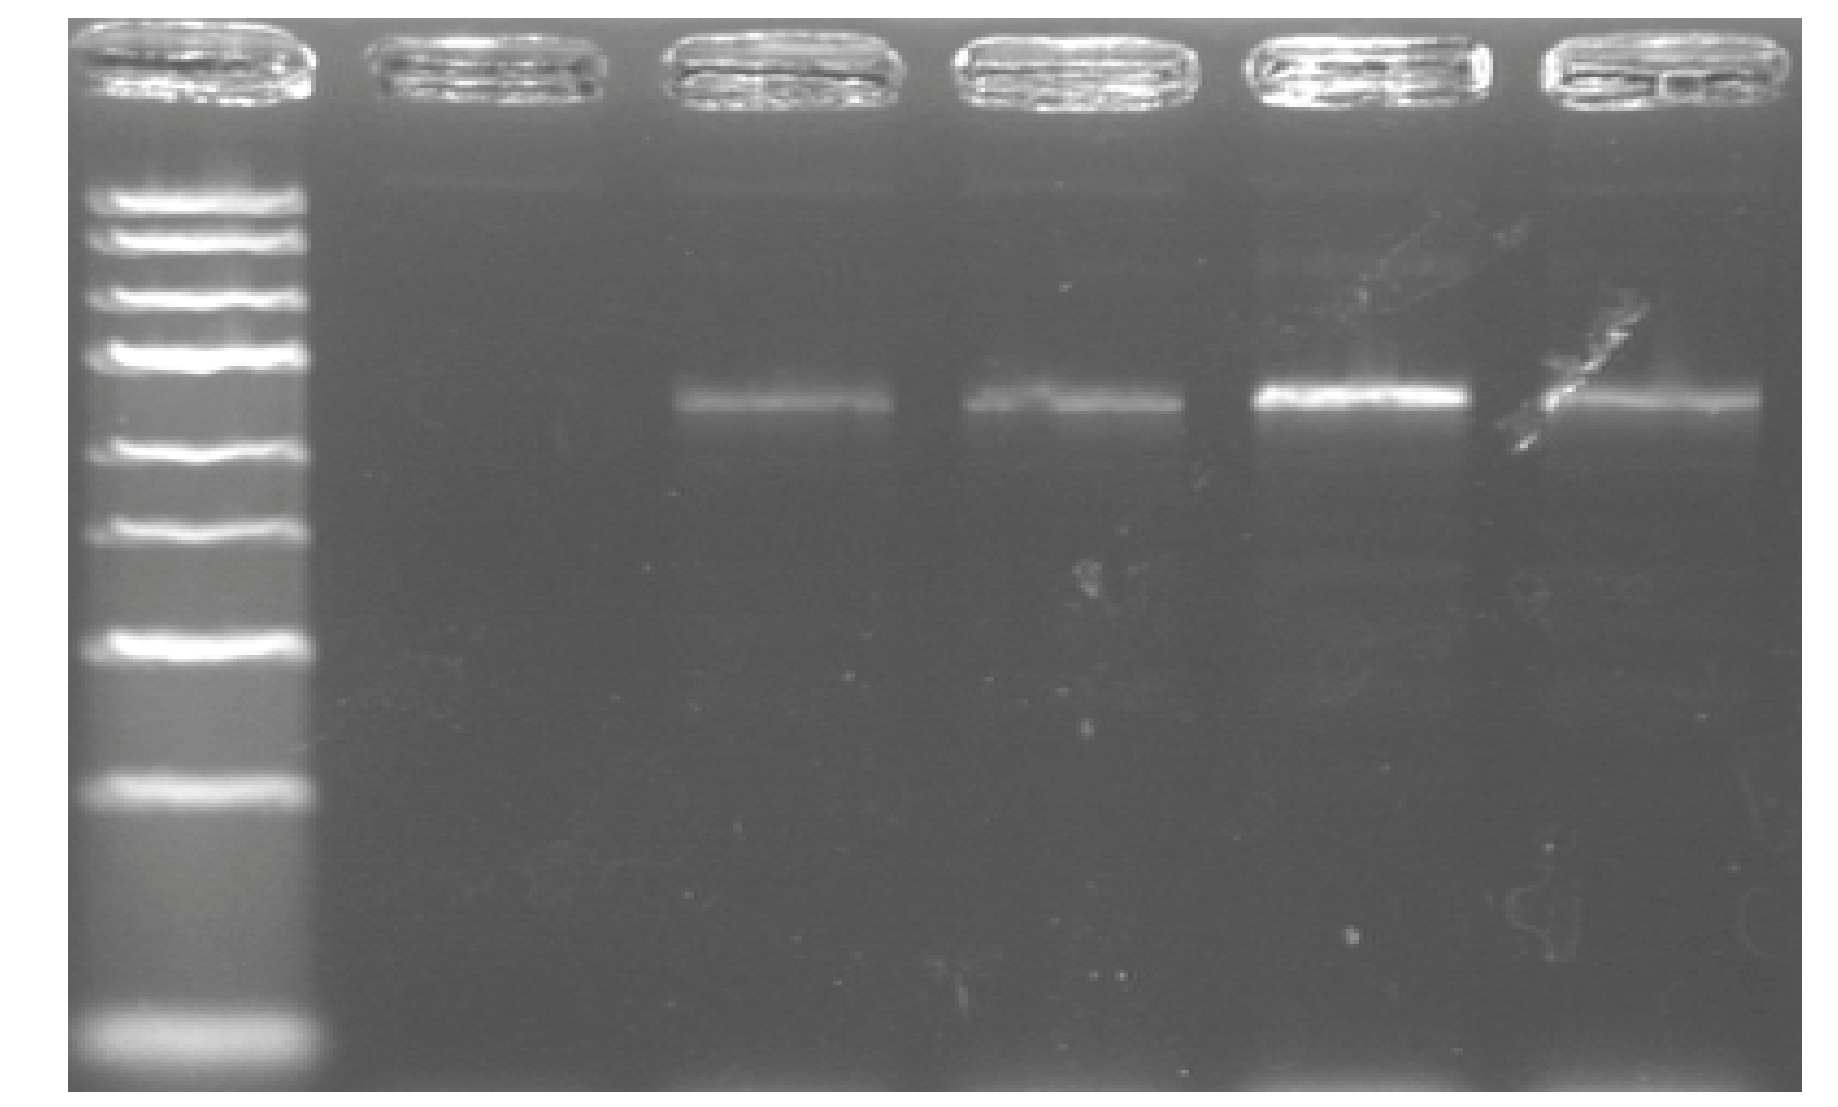

ORco Control Slit\_1 Slit\_4 Slit\_♂ Slit\_♀

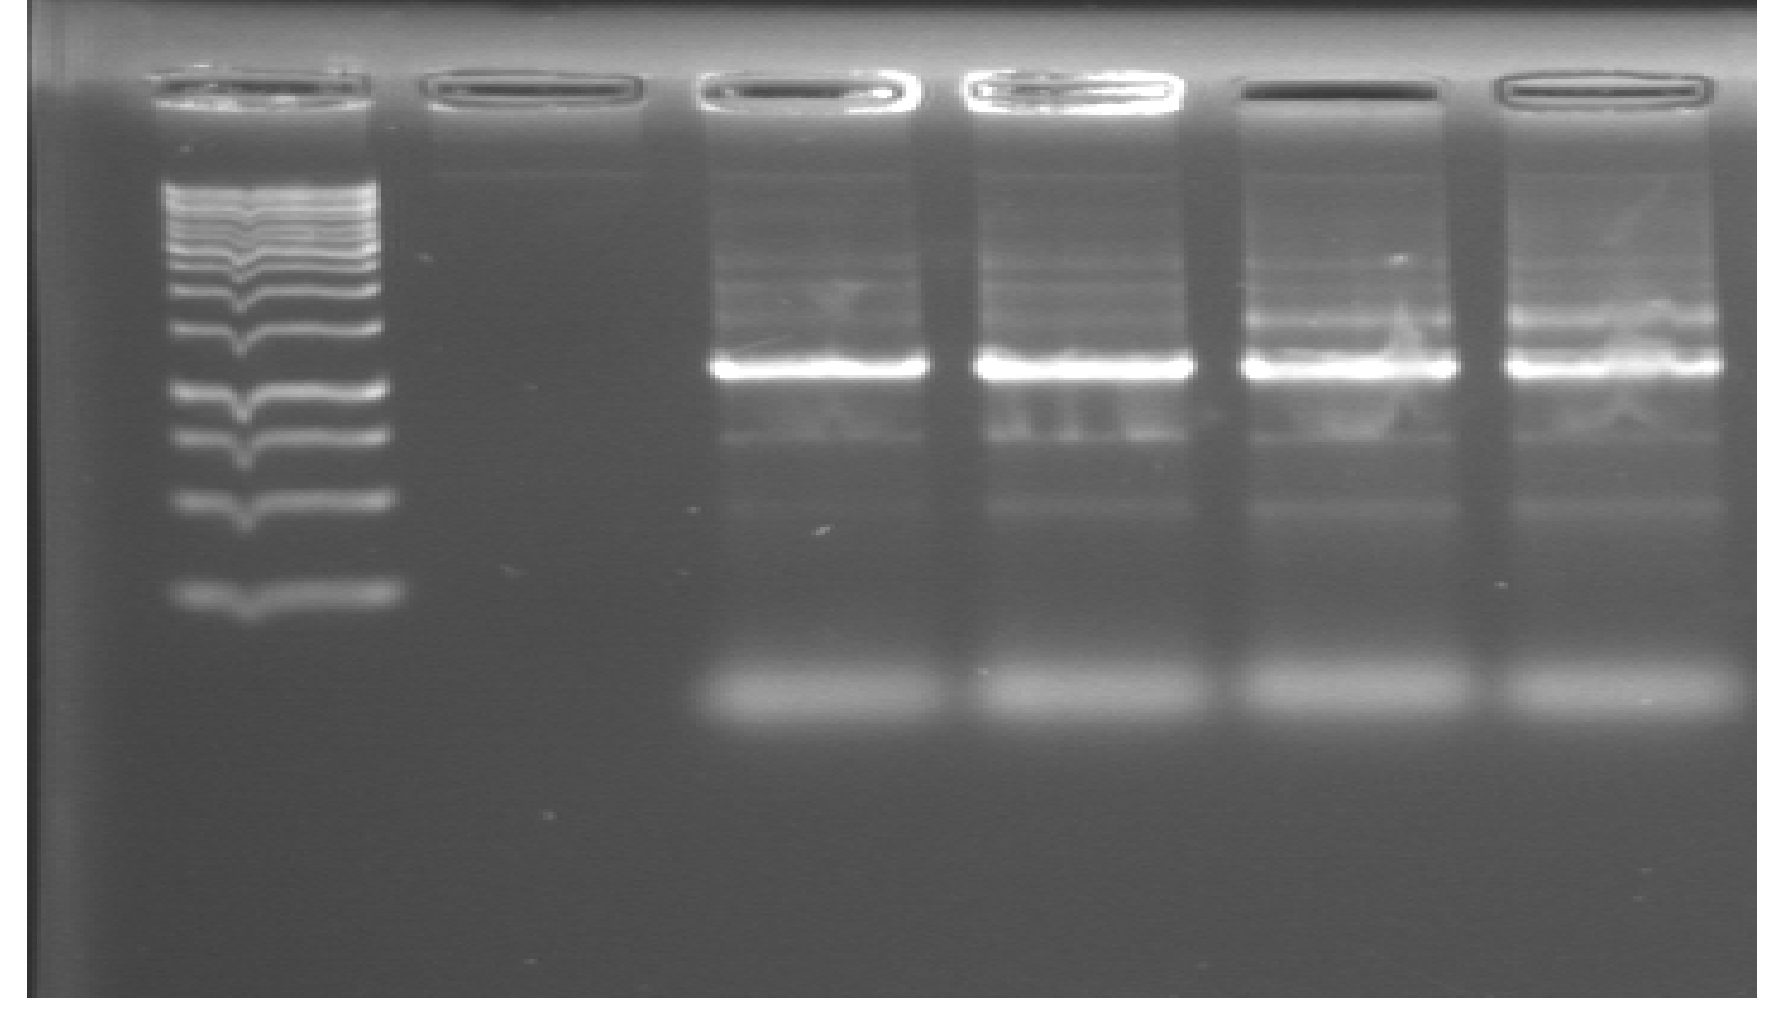

OR14 Control Slit\_1 Slit\_4 Slit\_♂ Slit\_♀

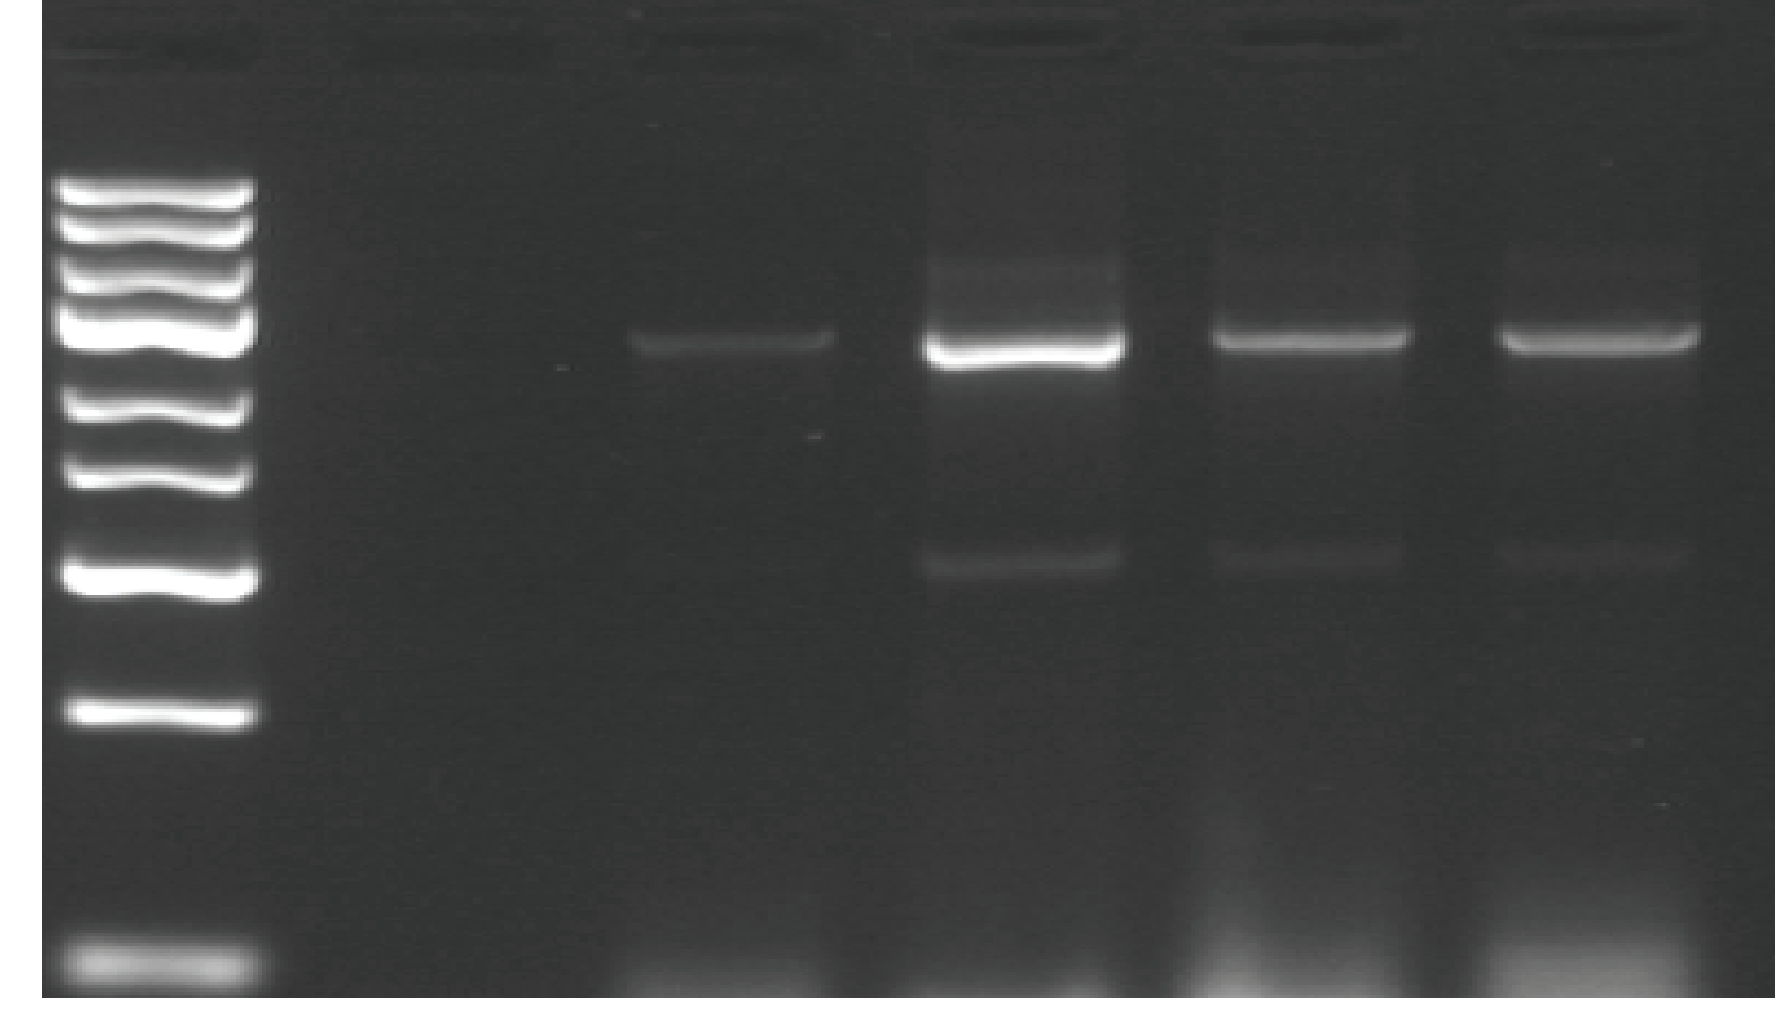

OR22 Control Slit\_1 Slit\_4 Slit\_♂ Slit\_♀

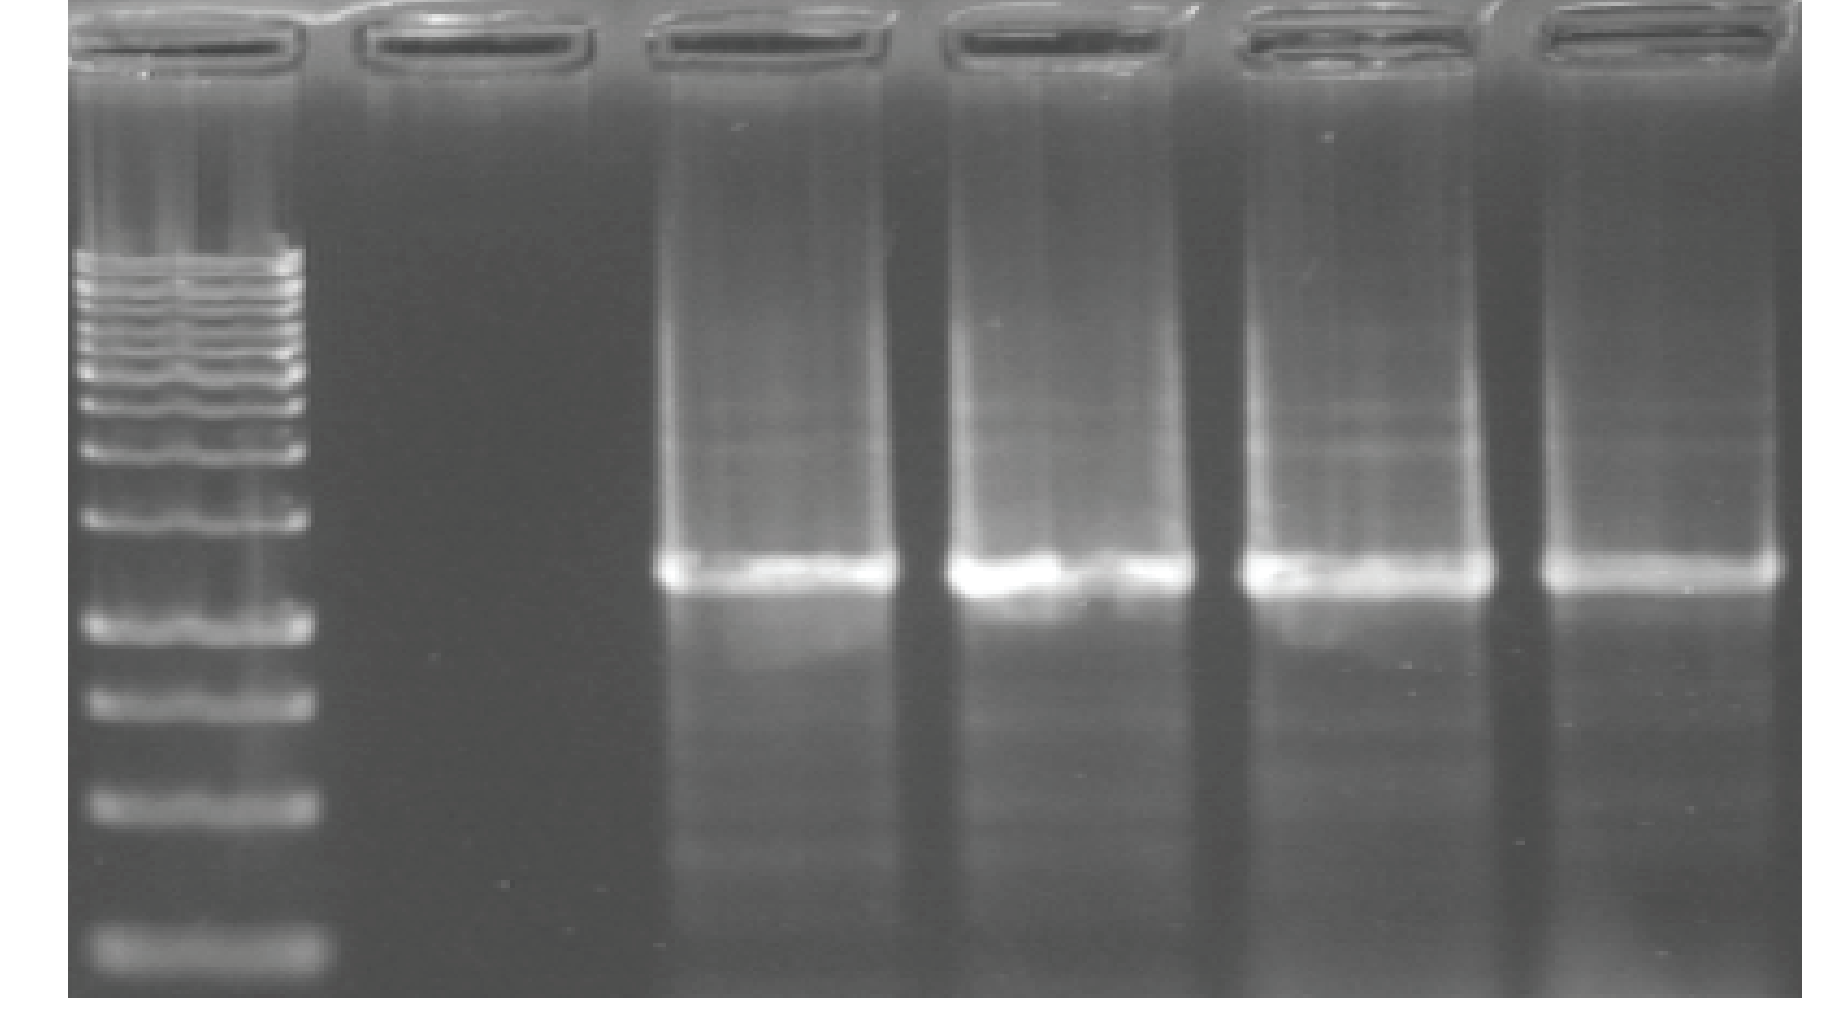

OR4 Control Slit\_1 Slit\_4 Slit\_♂ Slit\_♀

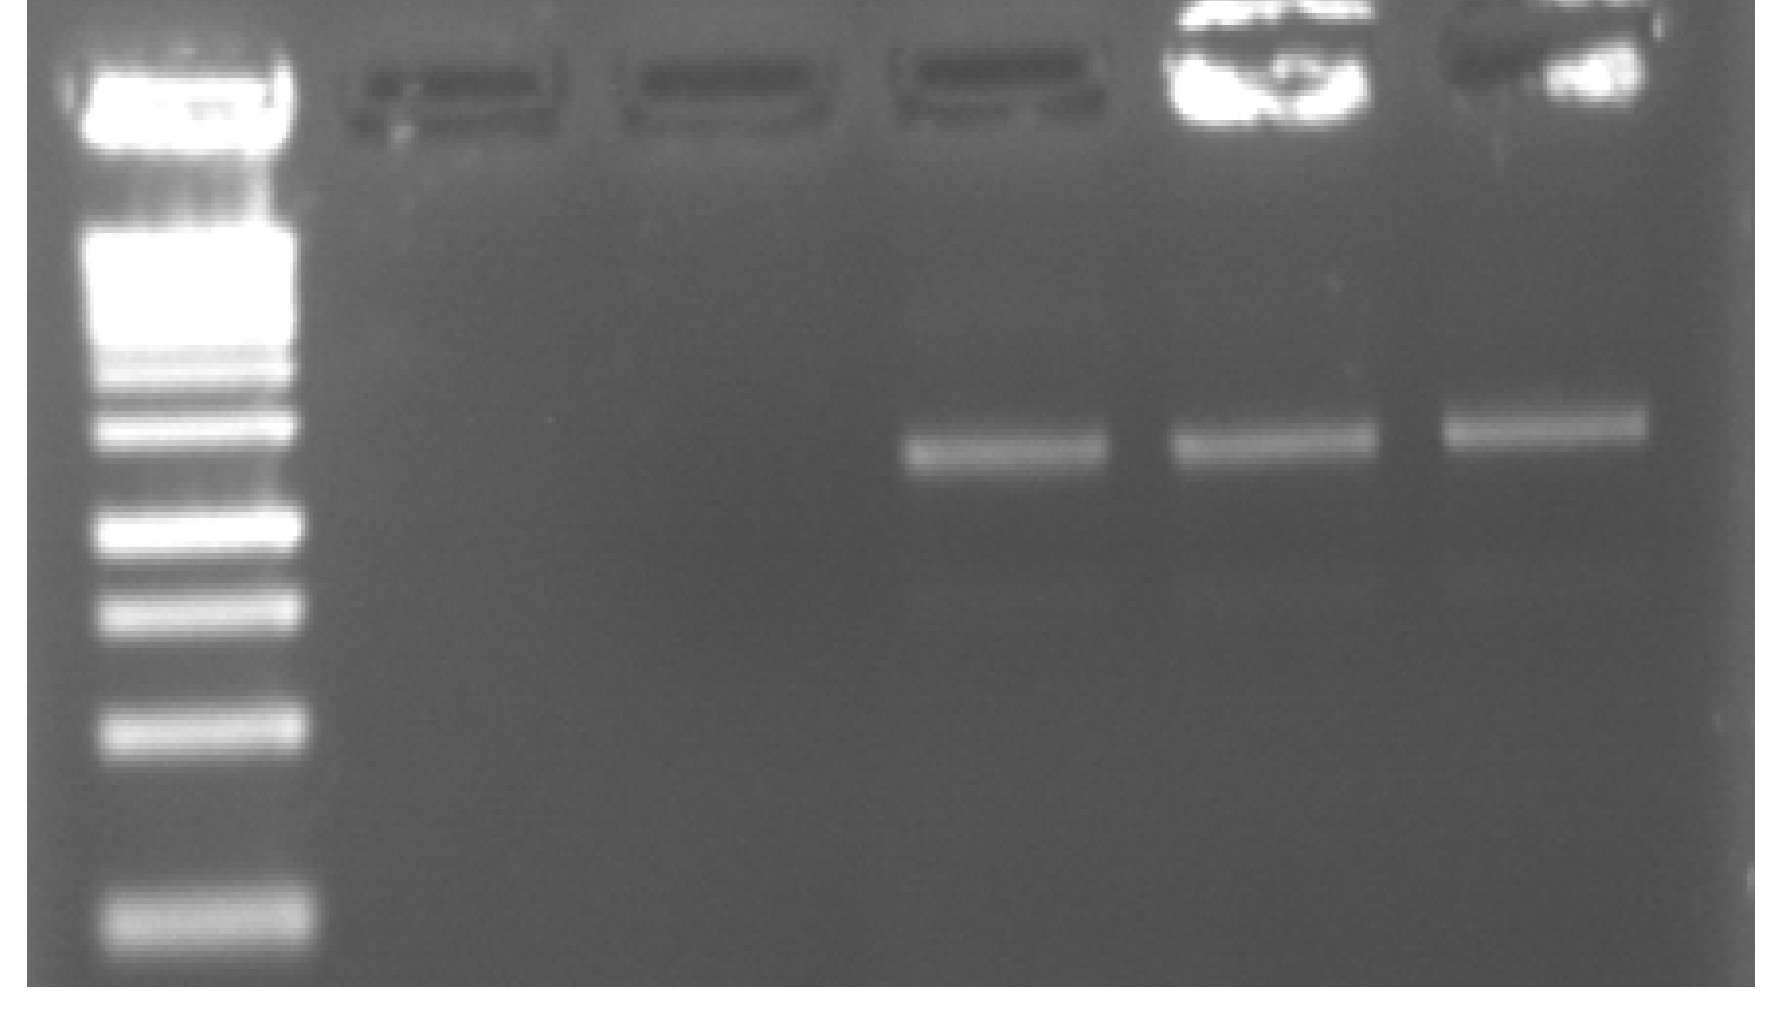

OR15 Control Slit\_1 Slit\_4 Slit\_♂ Slit\_♀

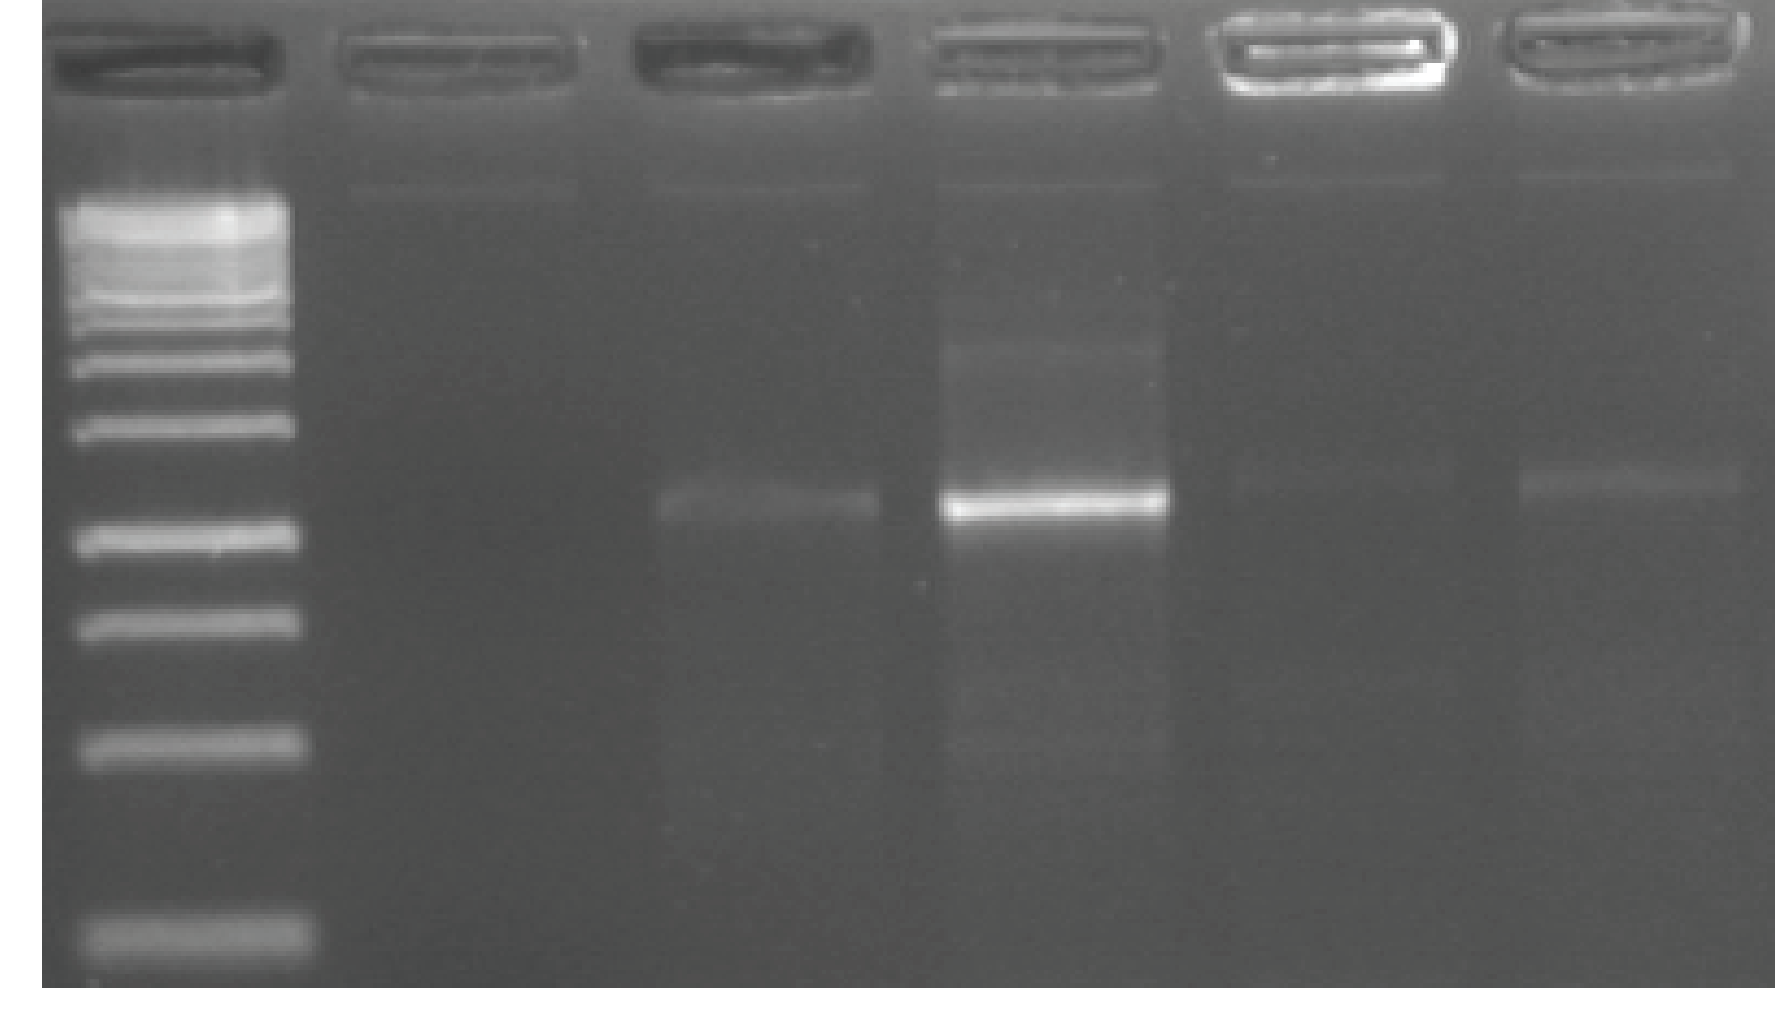

OR24 Control Slit\_1 Slit\_4 Slit\_♂ Slit\_♀

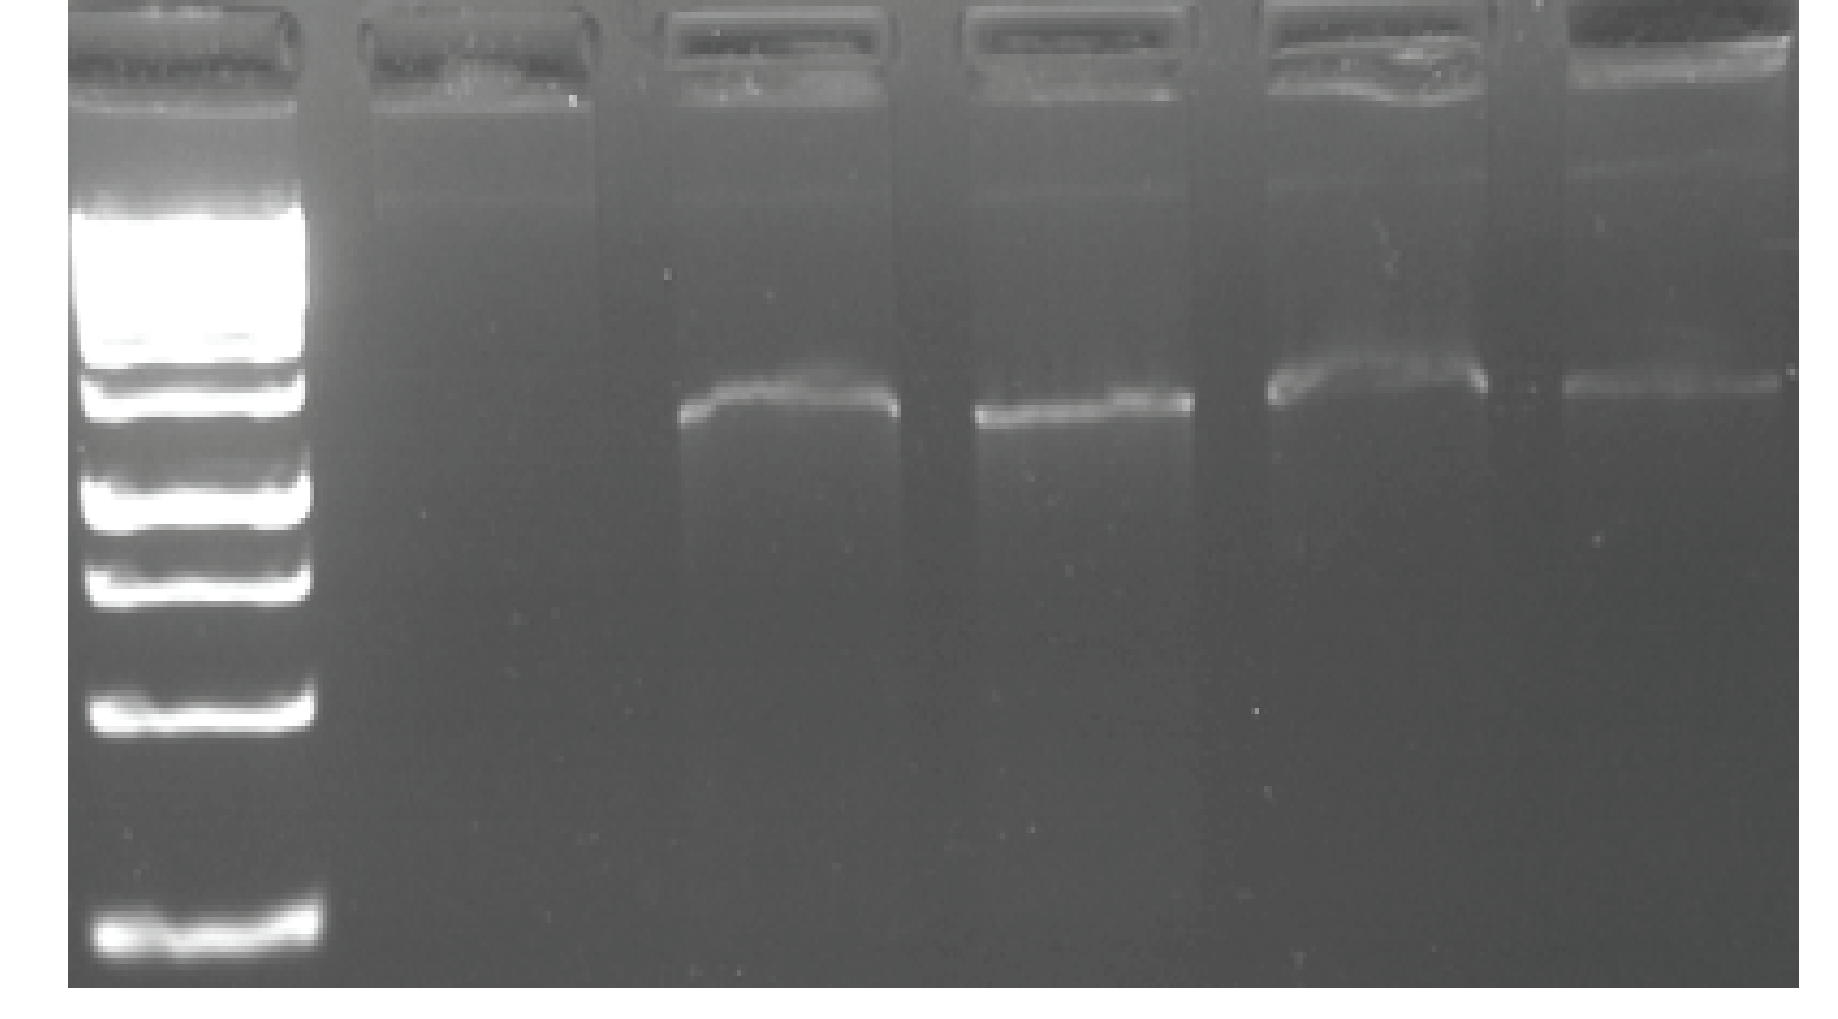

OR7 Control Slit\_1 Slit\_4 Slit\_♂ Slit\_♀

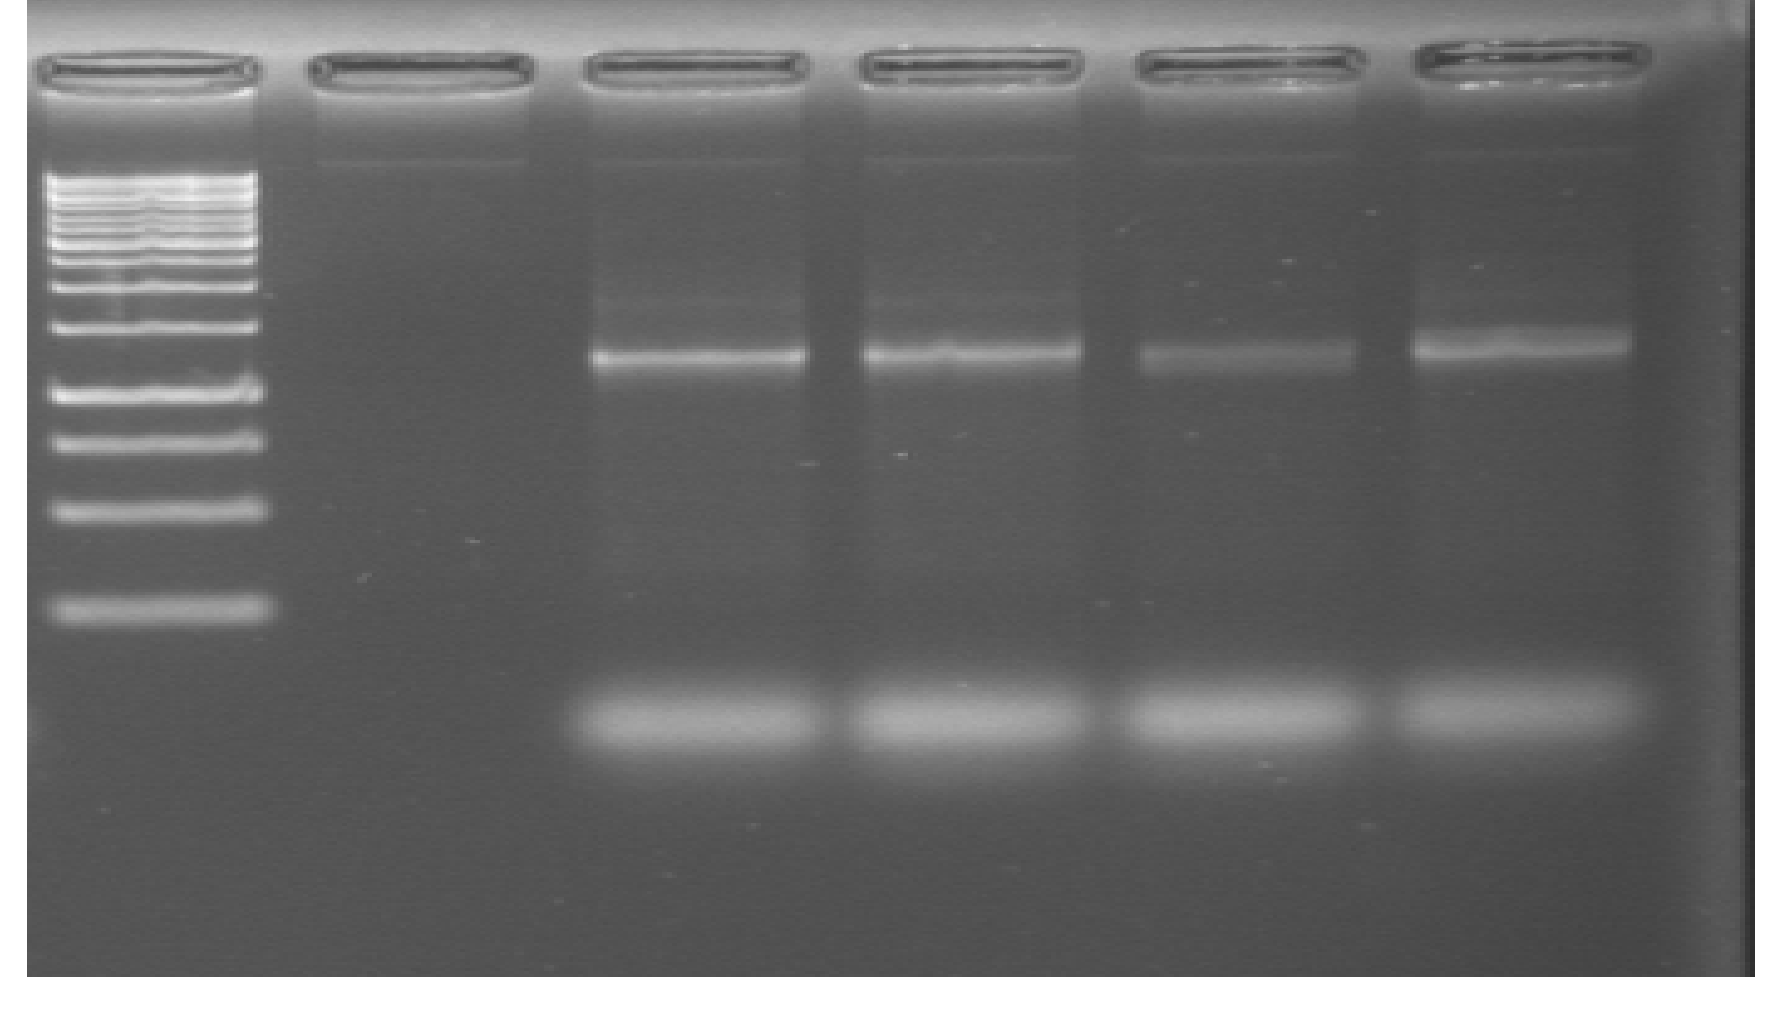

OR16 Control Slit\_1 Slit\_4 Slit\_♂ Slit\_♀

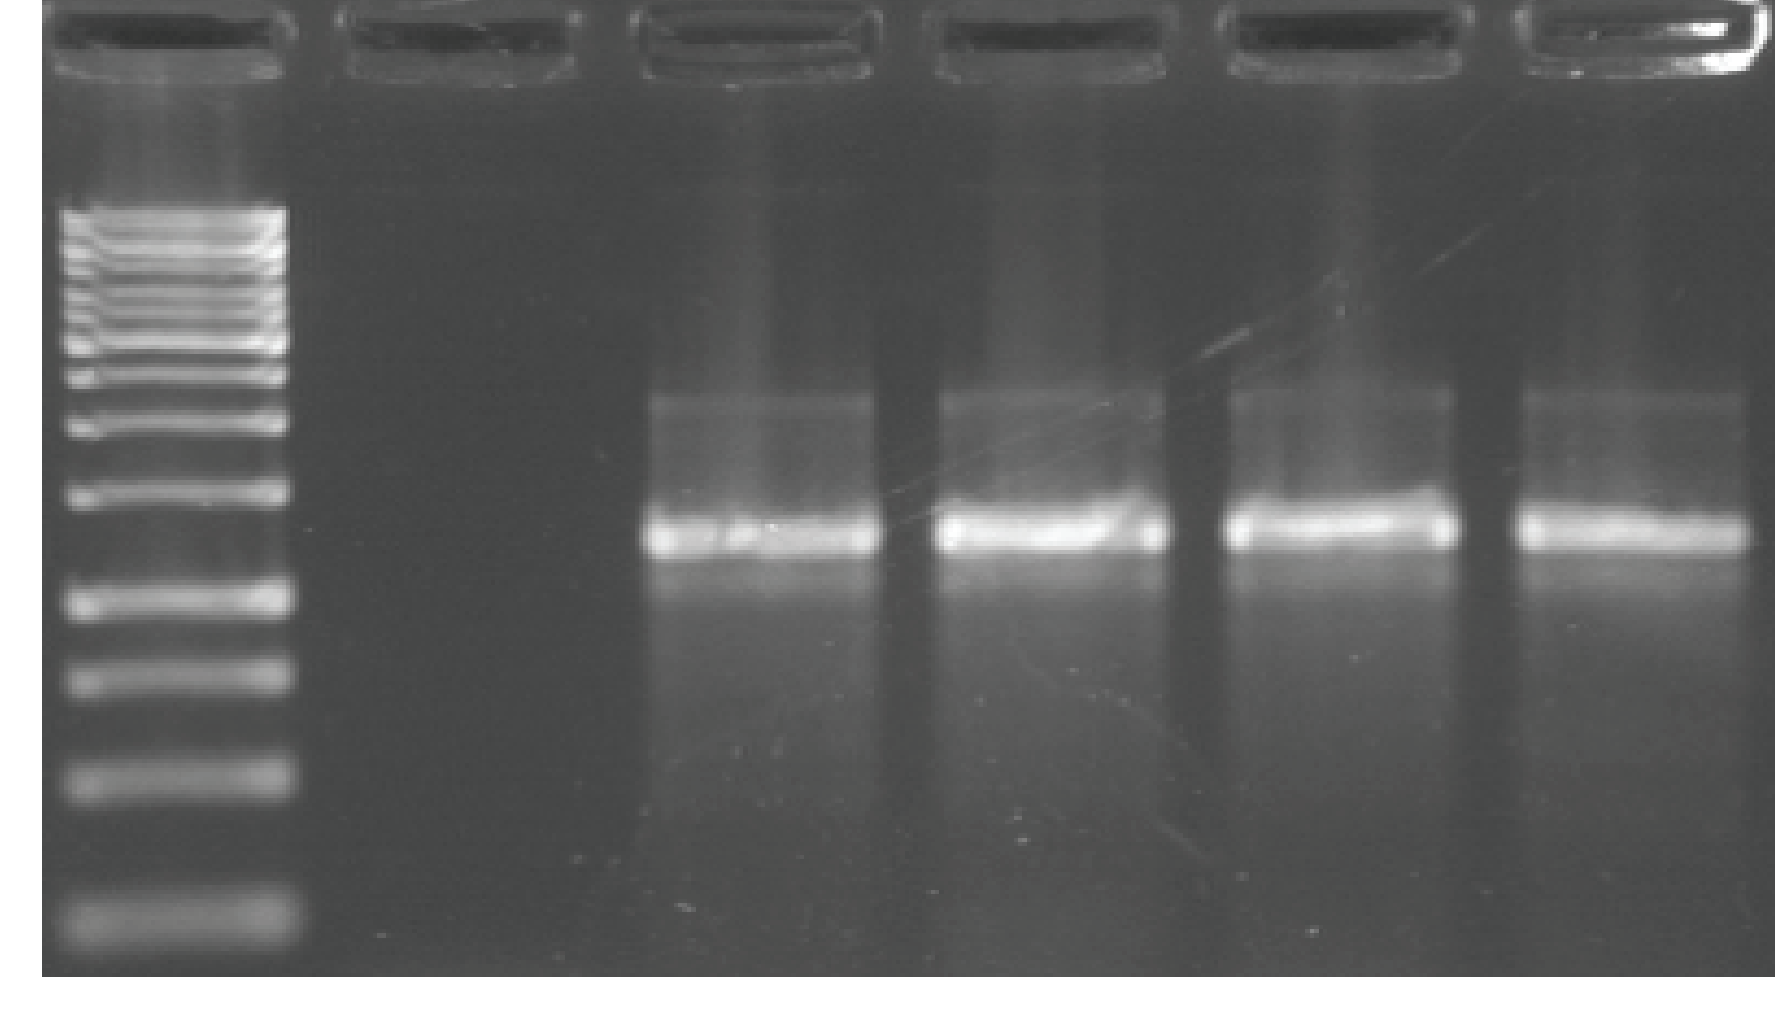

OR25 Control Slit\_1 Slit\_4 Slit\_♂ Slit\_♀

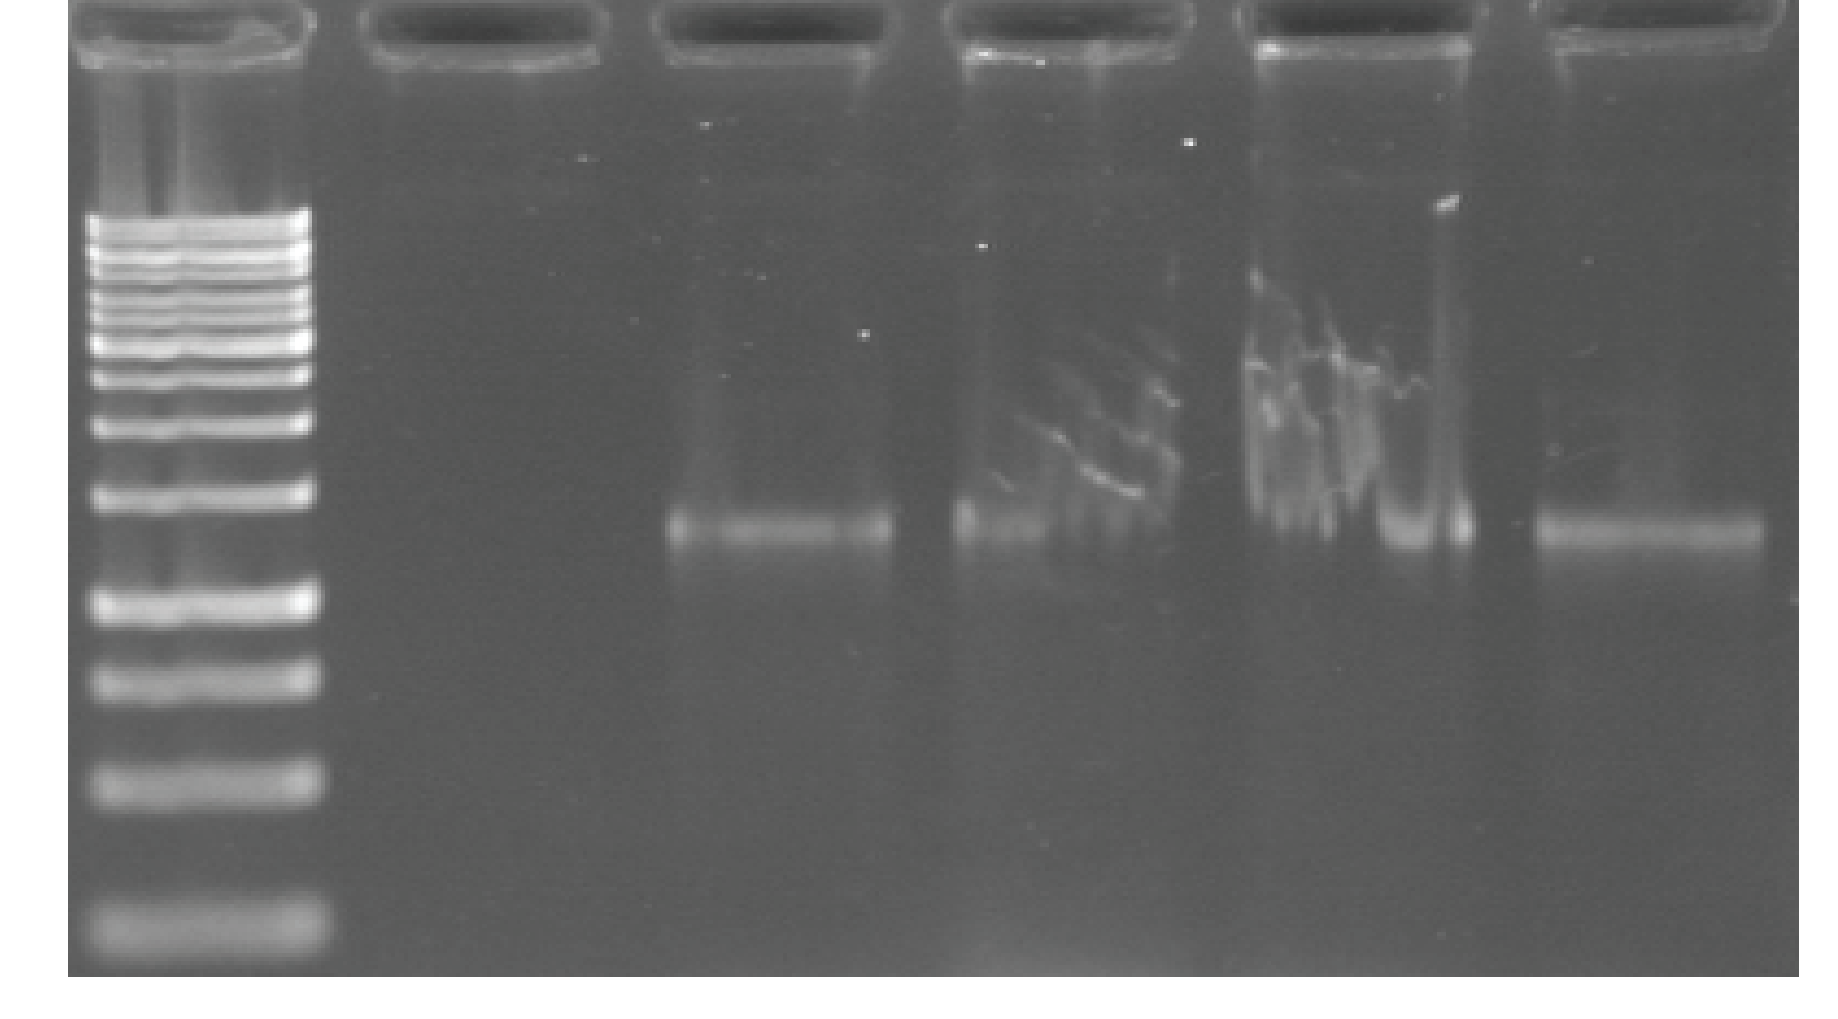

OR8 Slit\_1 Slit\_4 Slit\_♂ Slit\_♀ Control

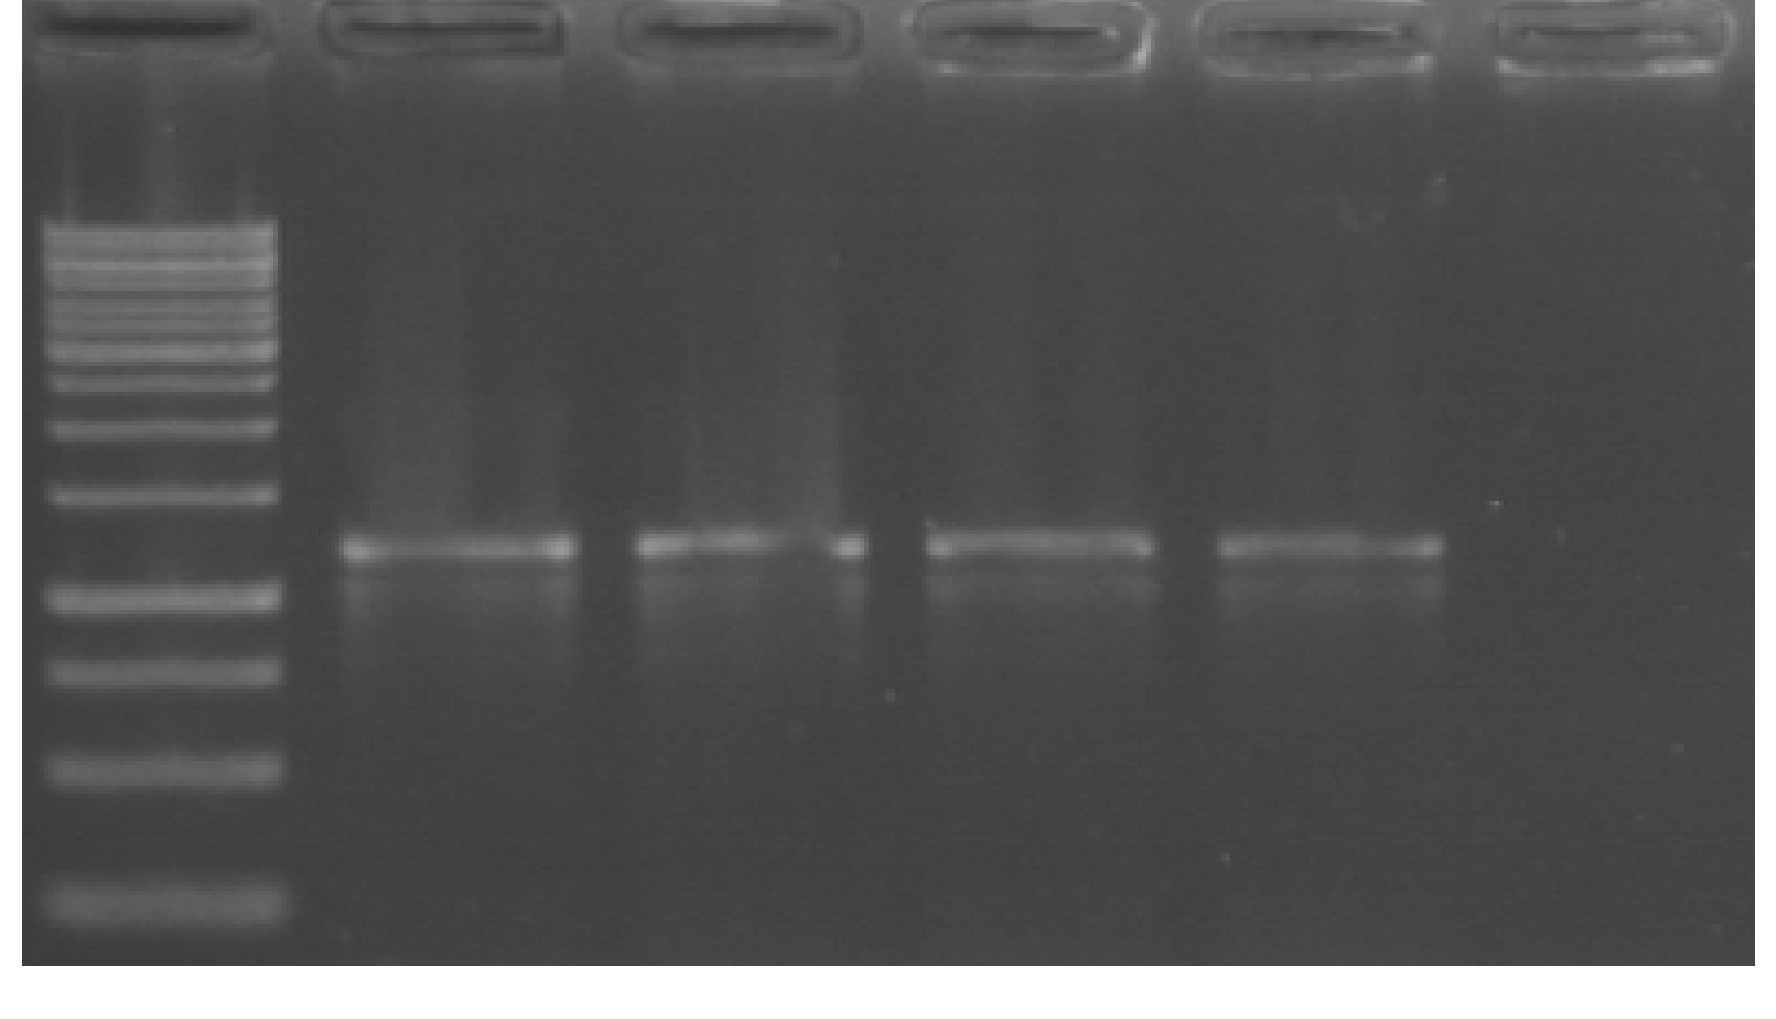

OR18 Control Slit\_1 Slit\_4 Slit\_♂ Slit\_♀

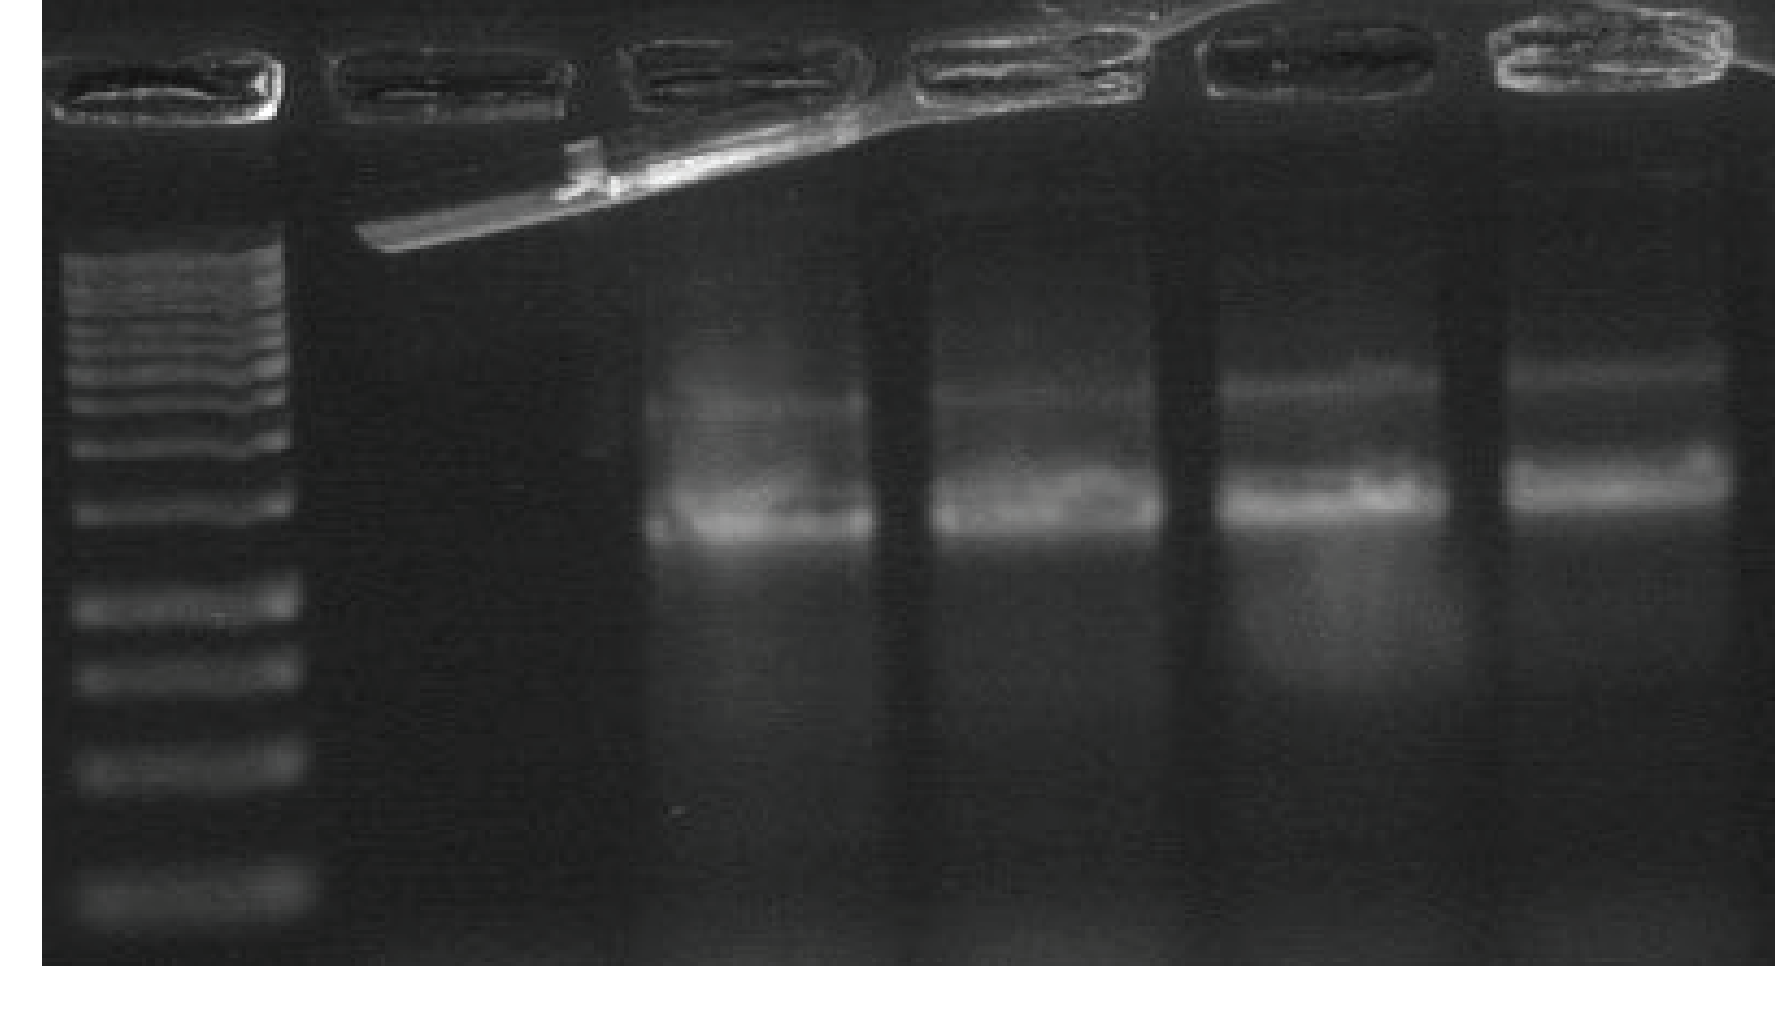

OR27 Control Slit\_1 Slit\_4 Slit\_♂ Slit\_♀

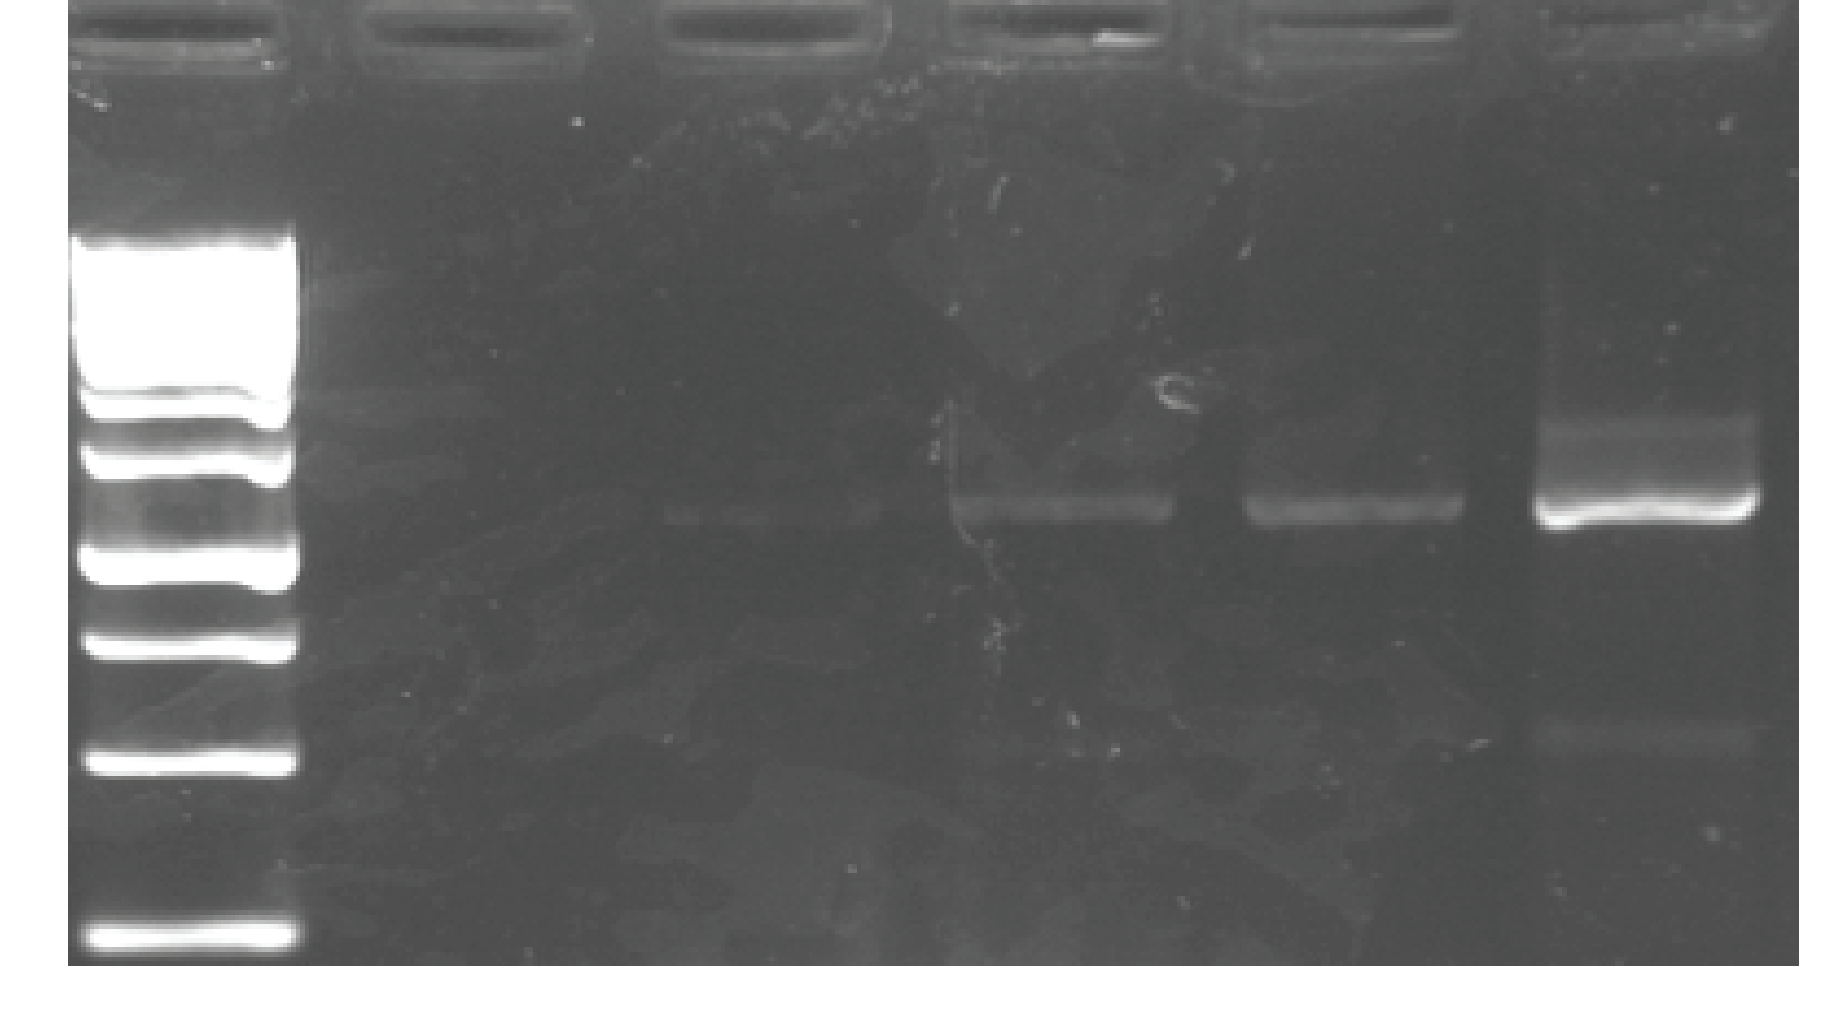

OR9 Slit\_1 Slit\_4 Slit\_♂ Slit\_♀ Control

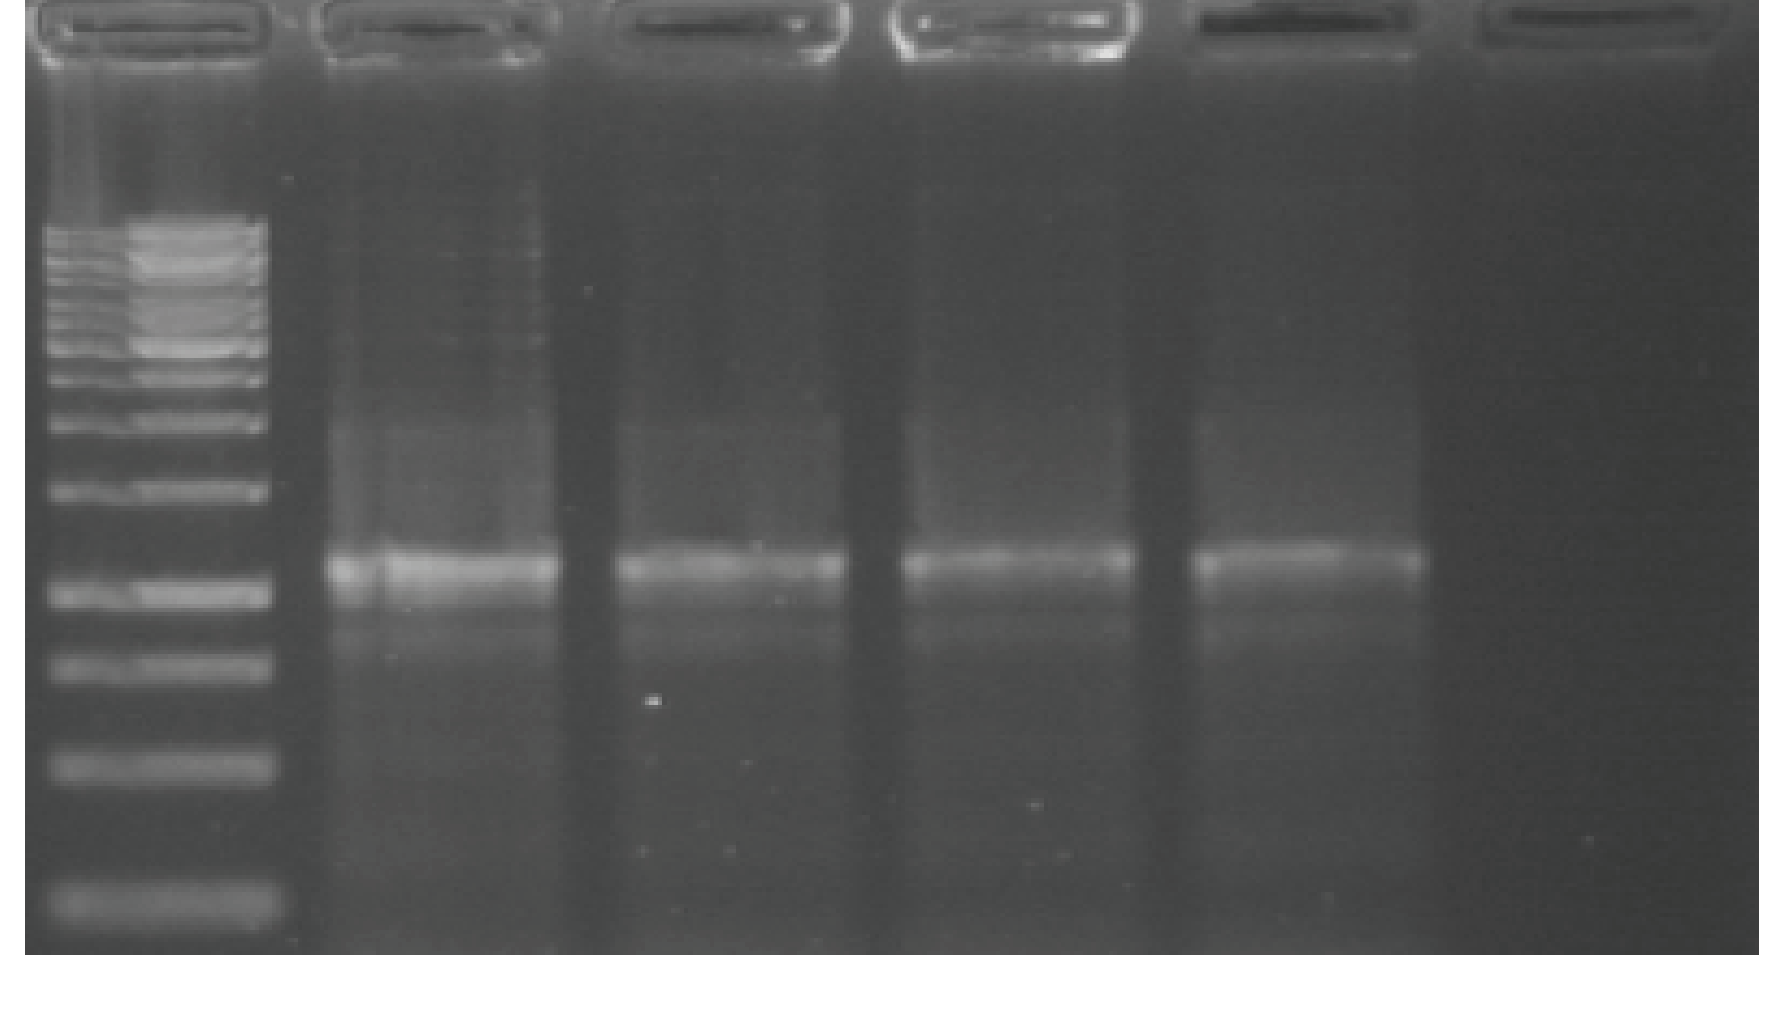

OR19 Control Slit\_1 Slit\_4 Slit\_♂ Slit\_♀

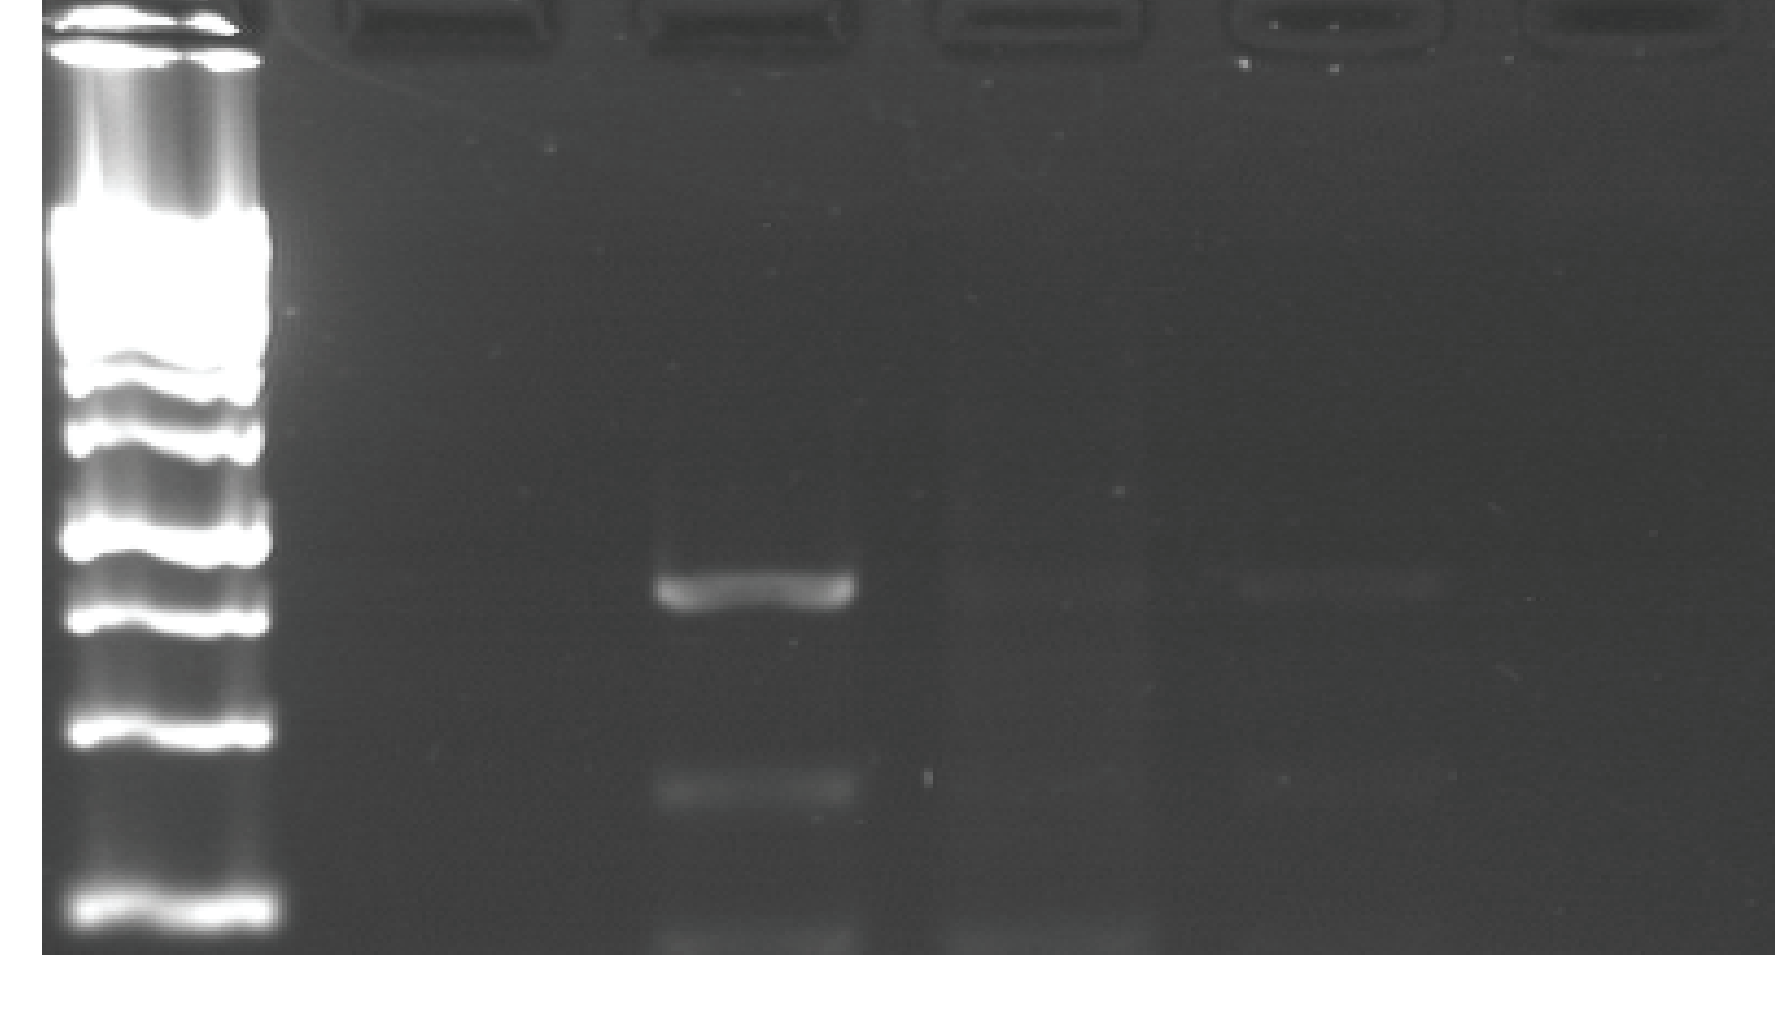

OR28 Control Slit\_1 Slit\_4 Slit\_♂ Slit\_♀

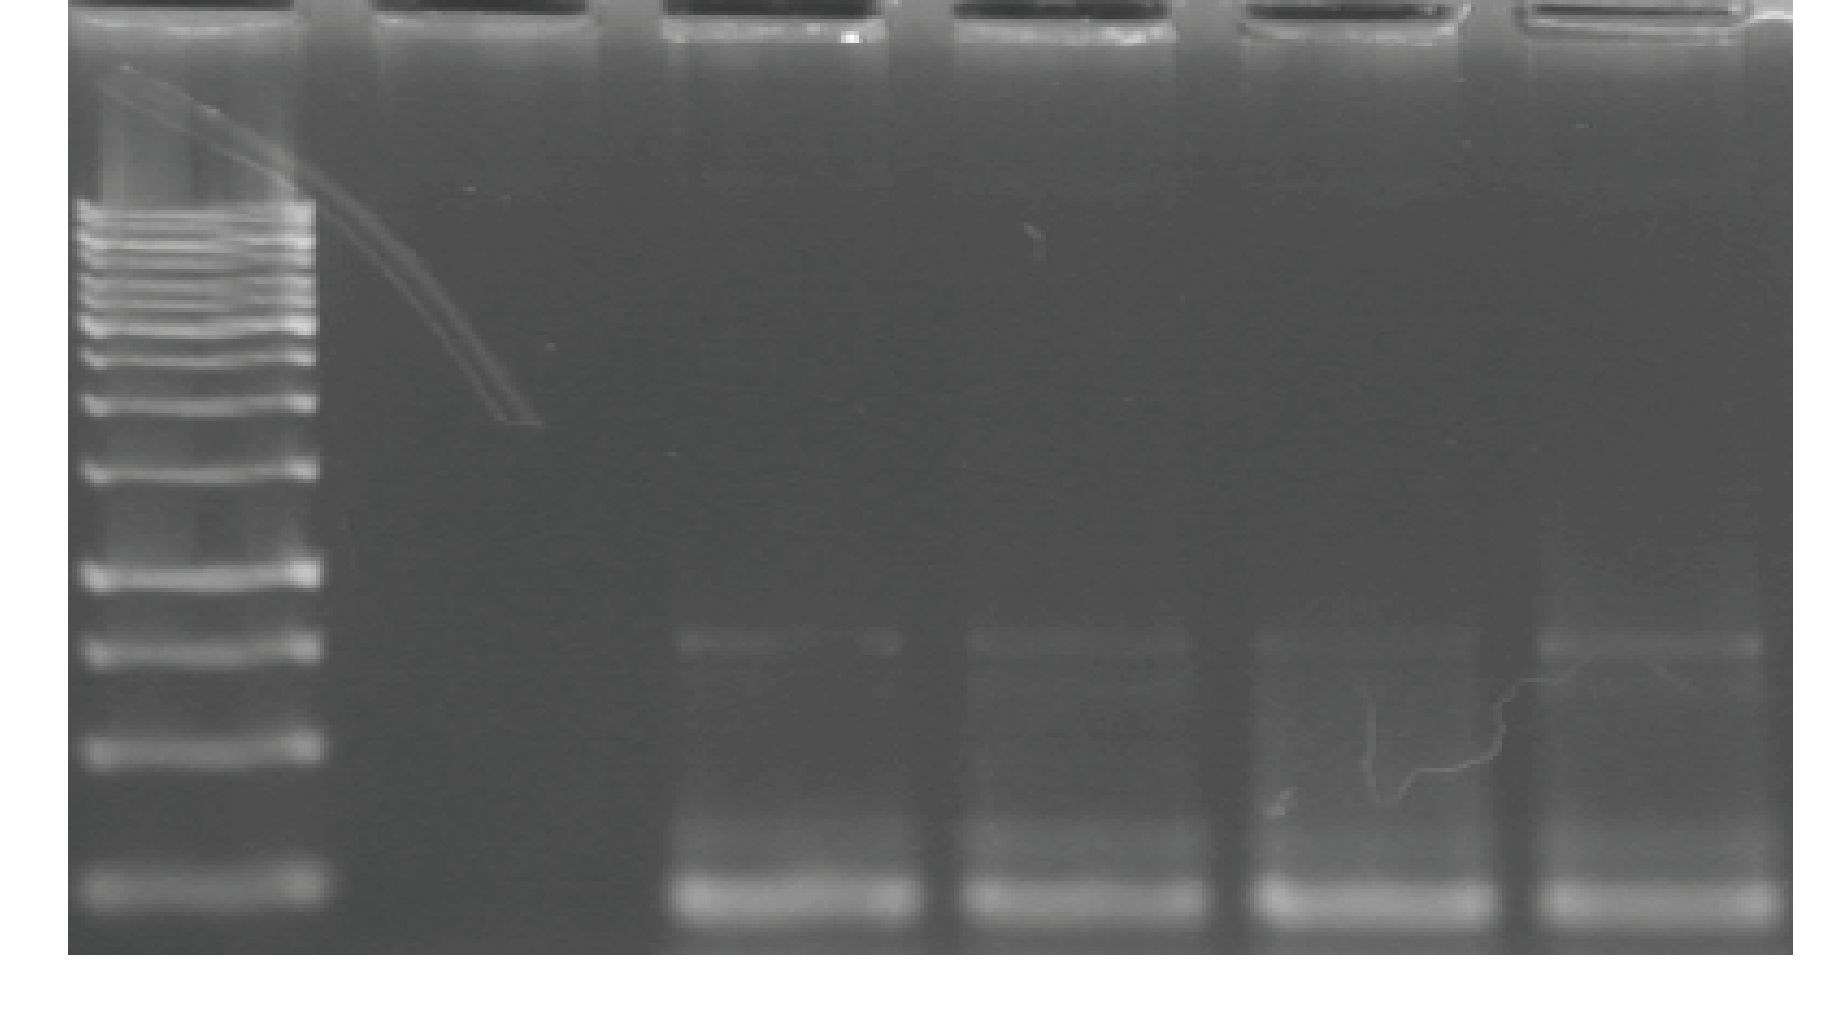

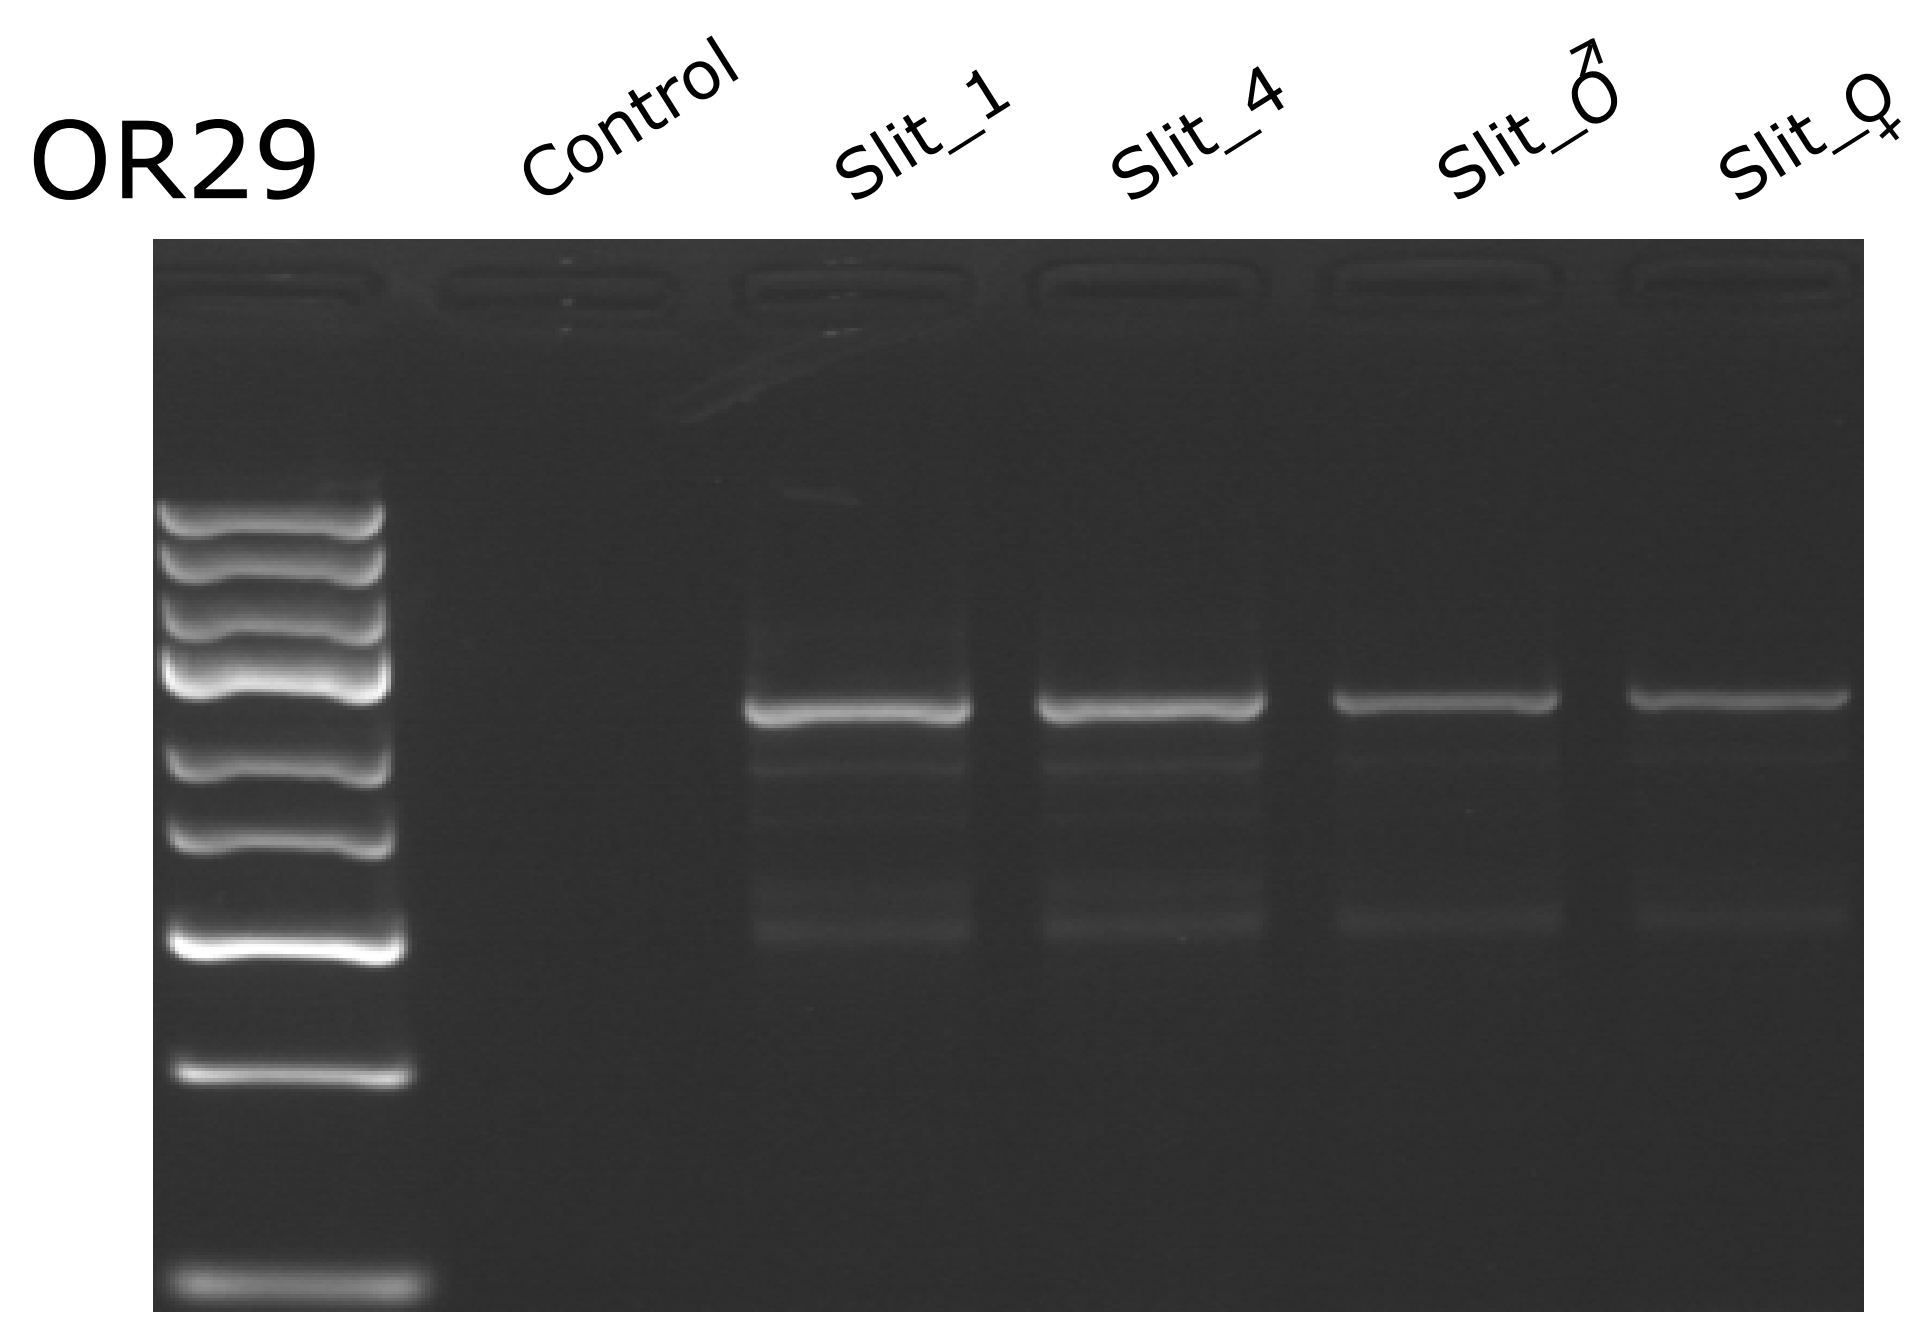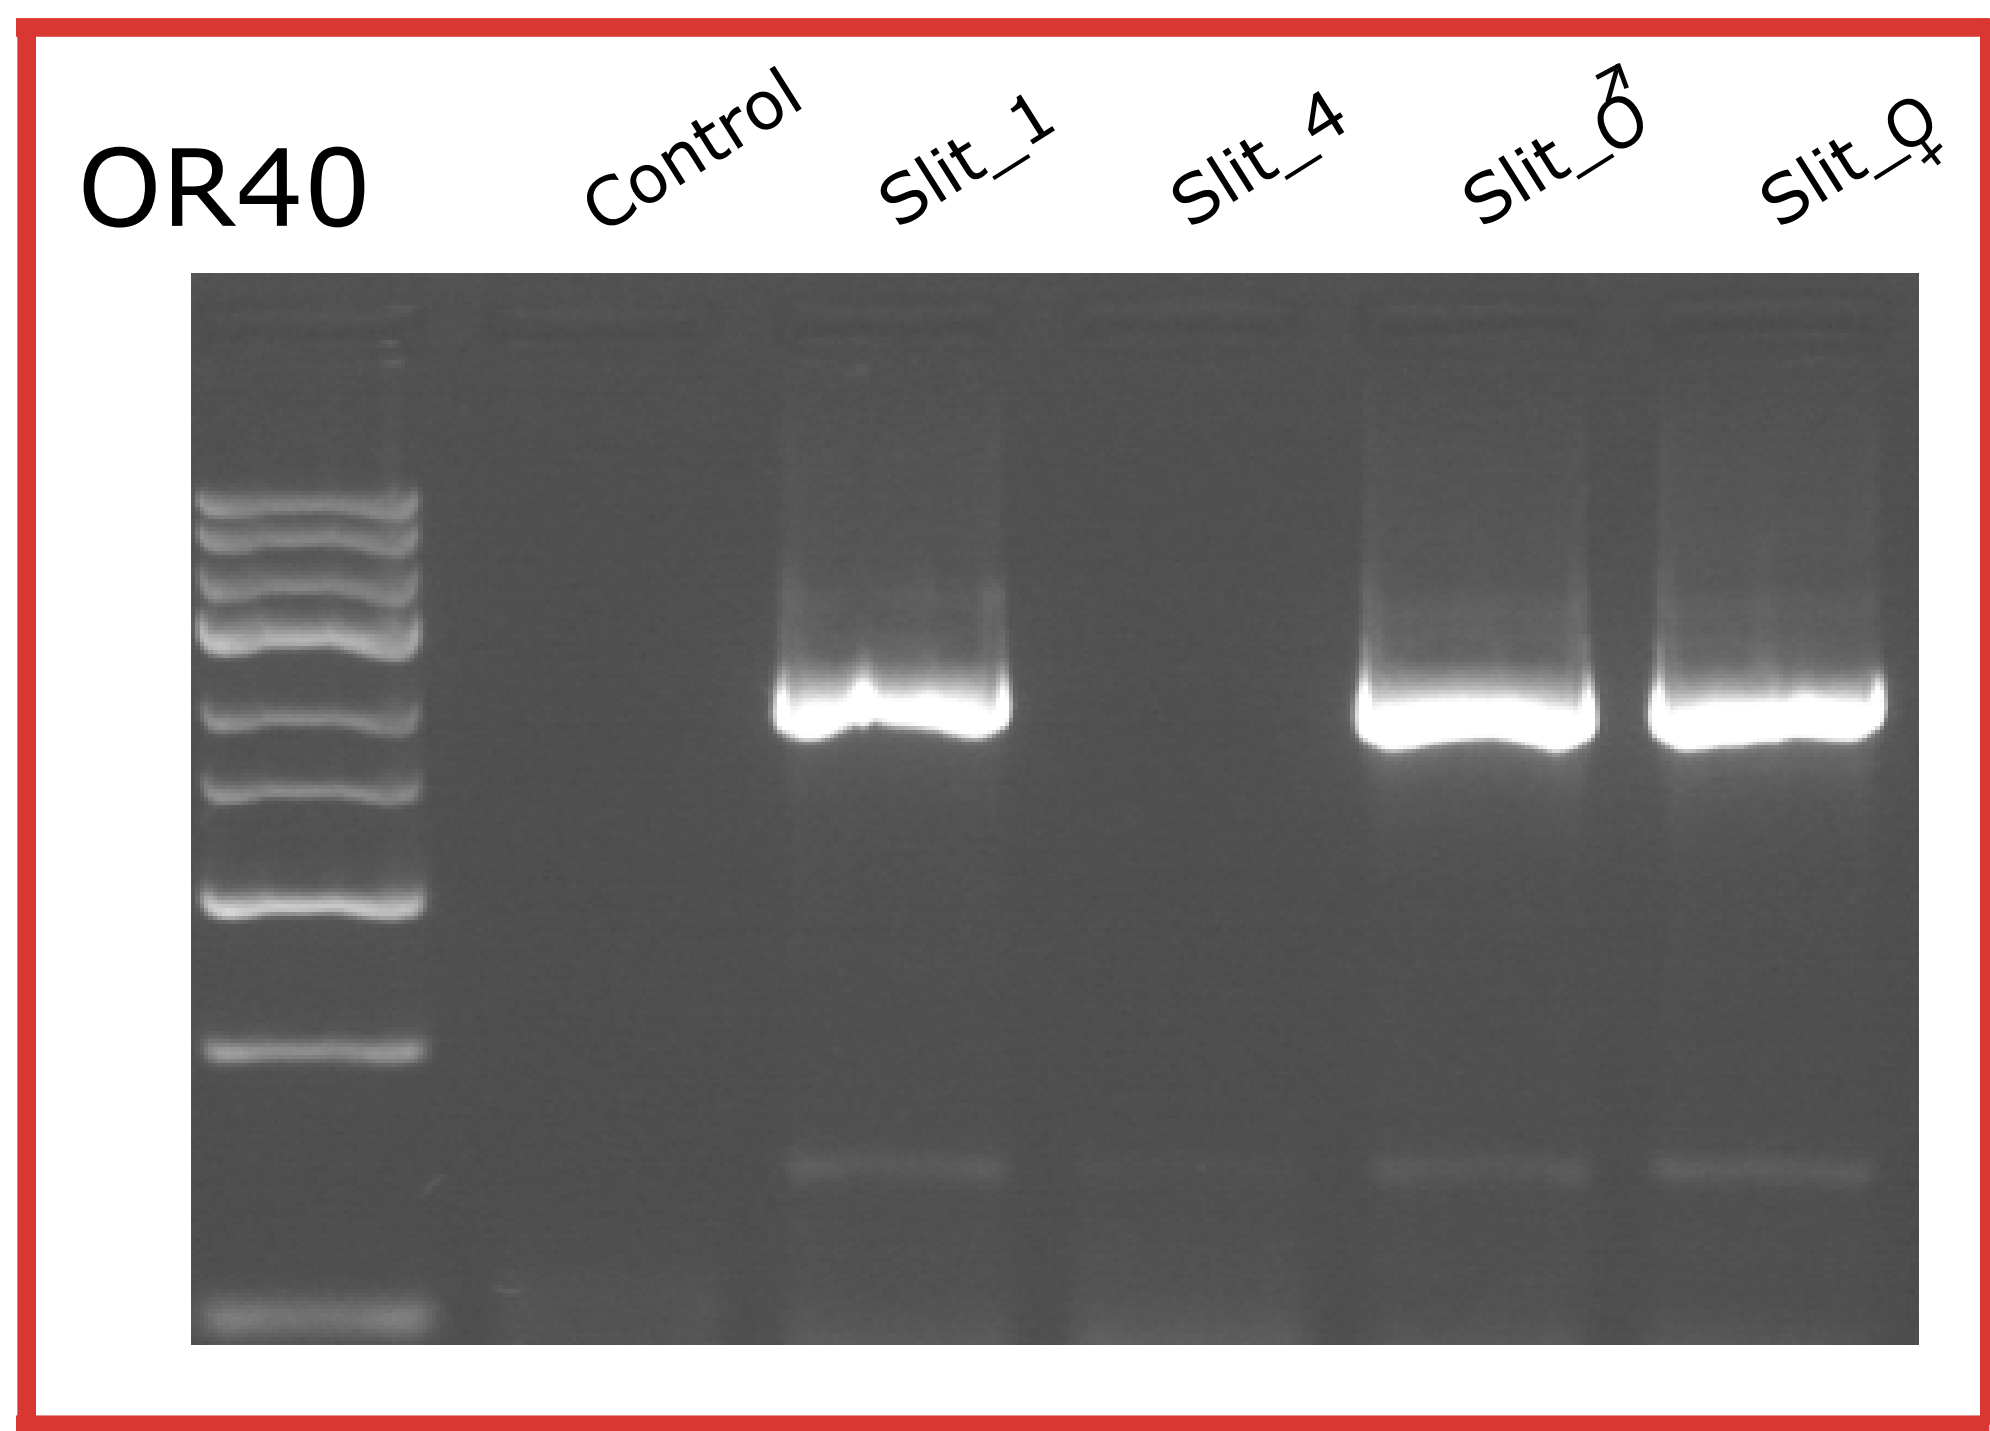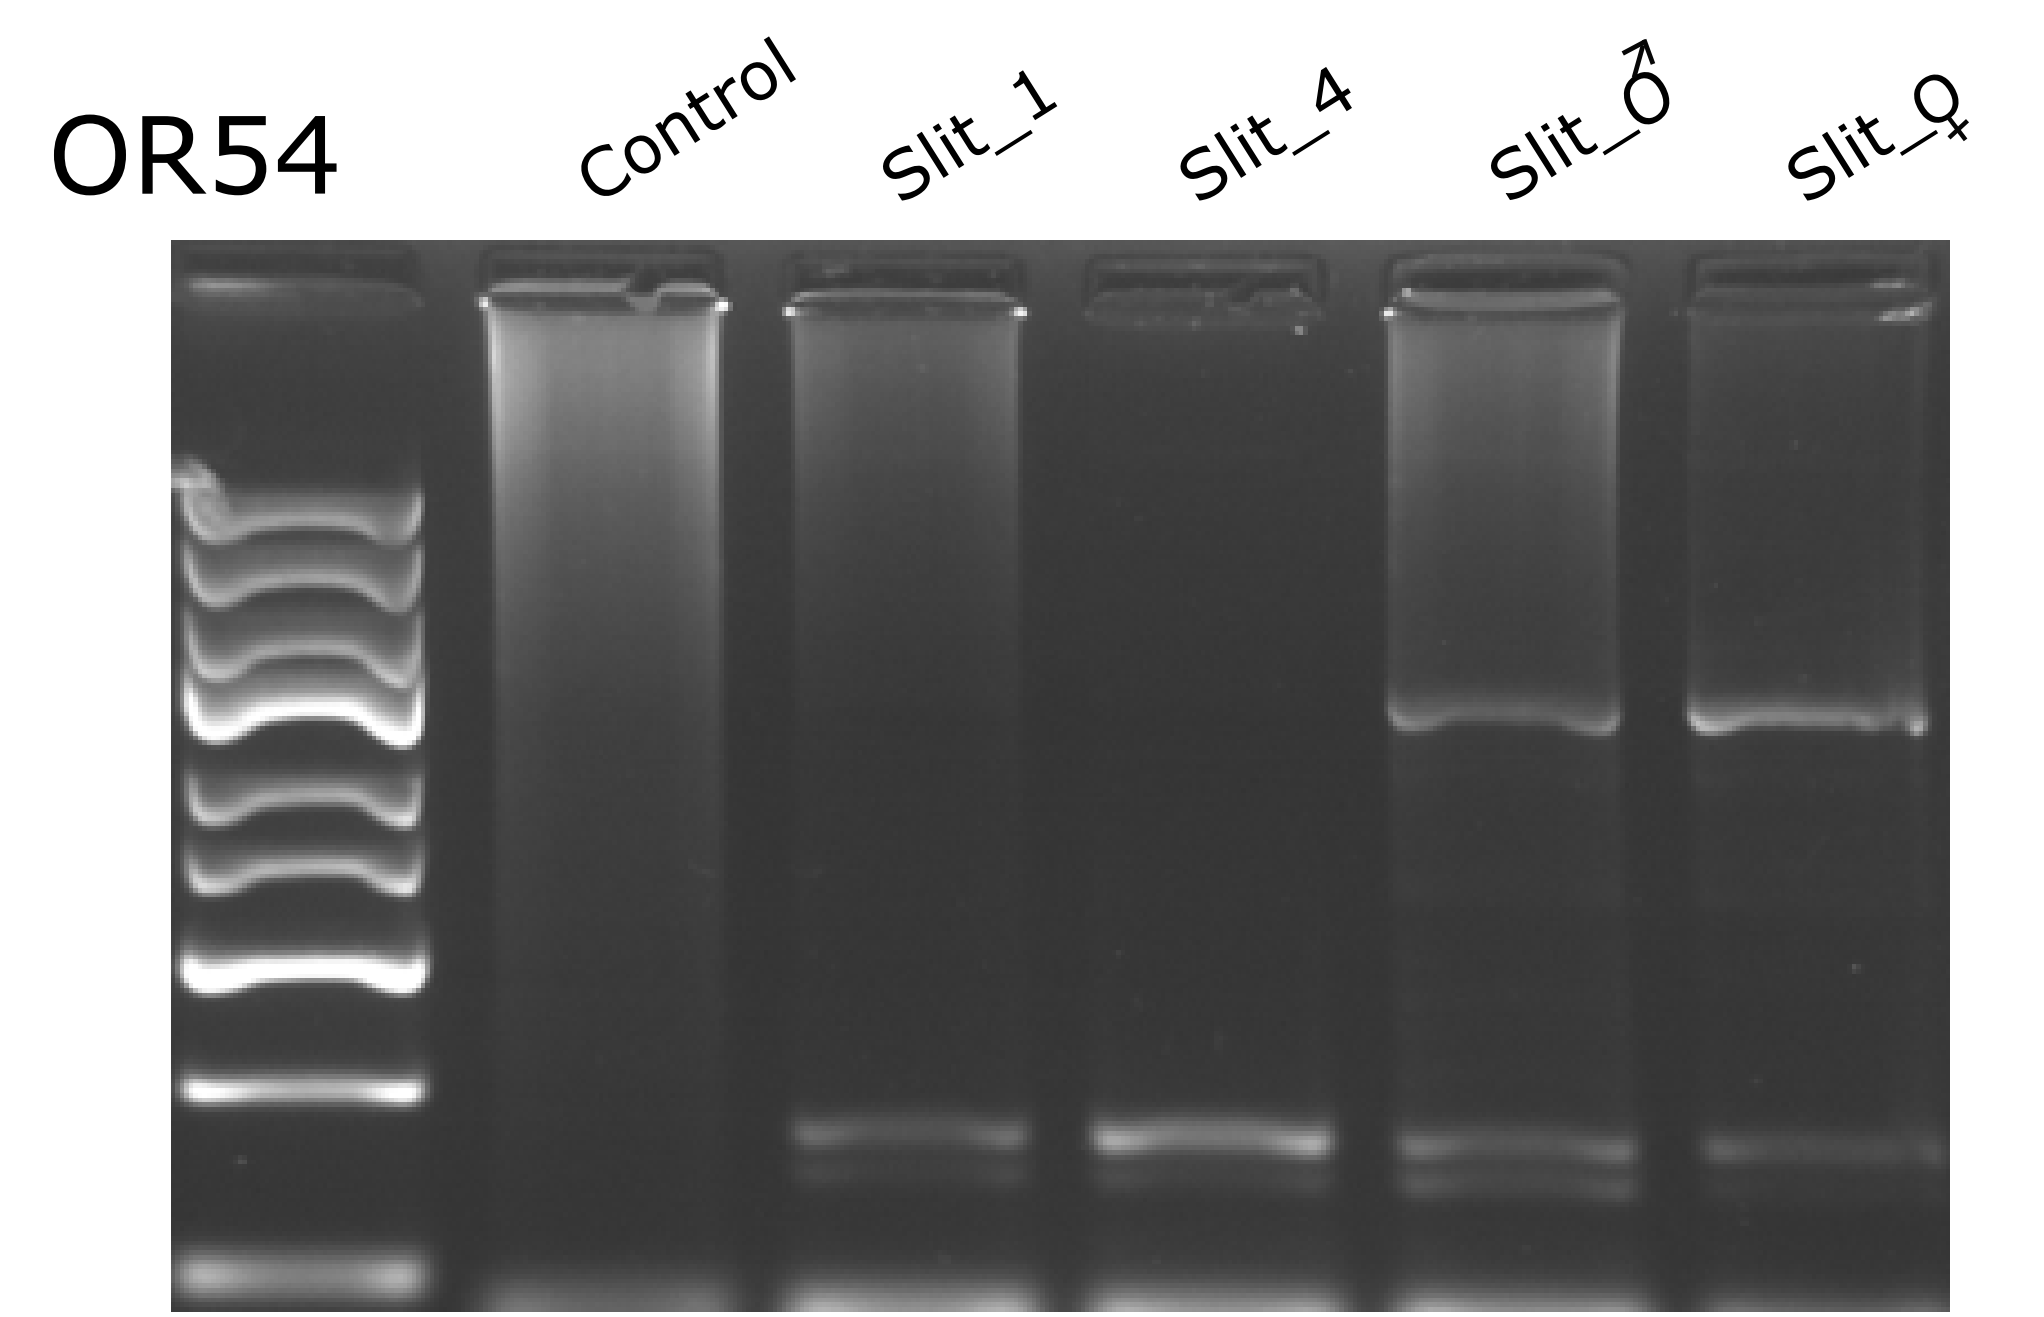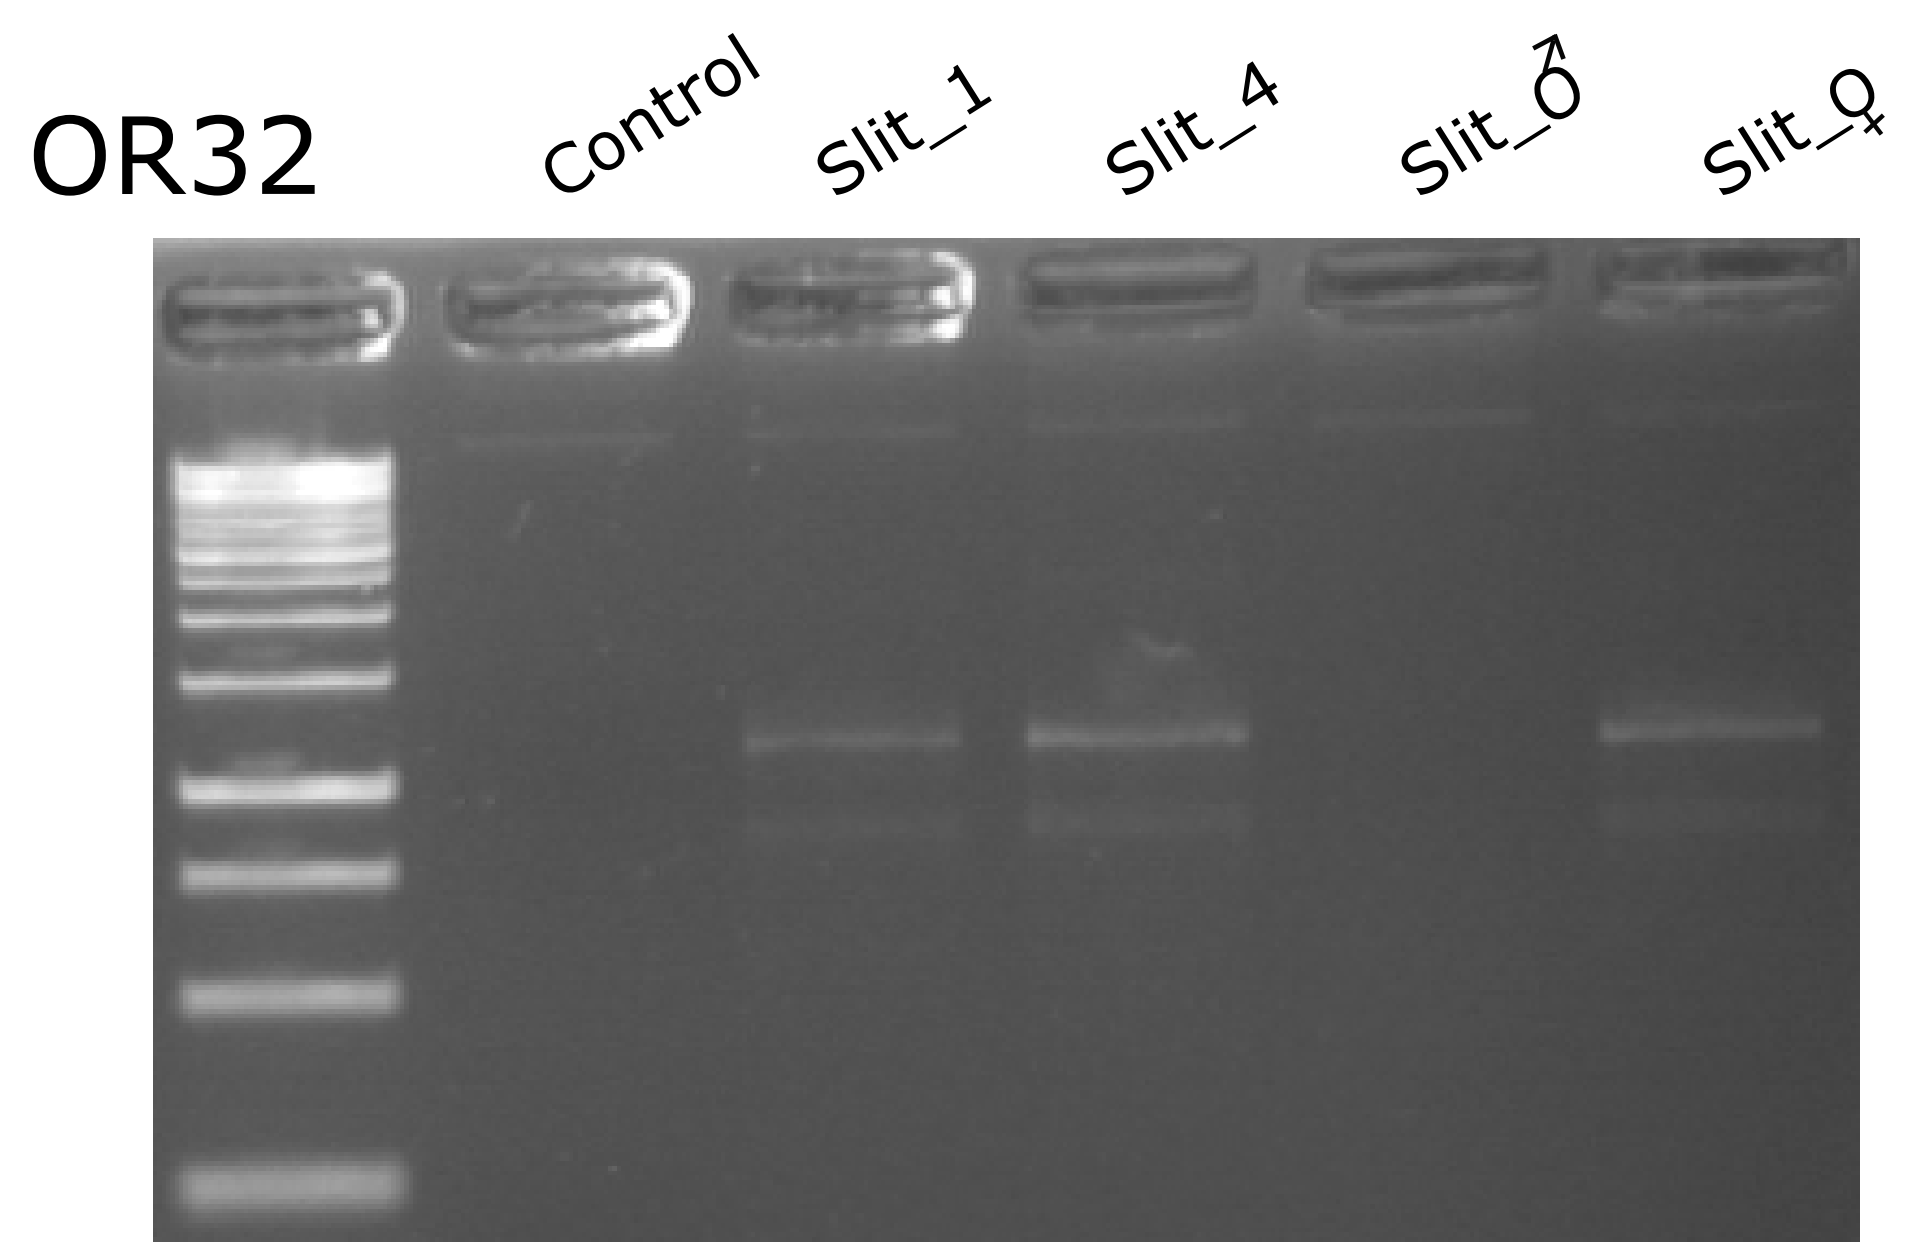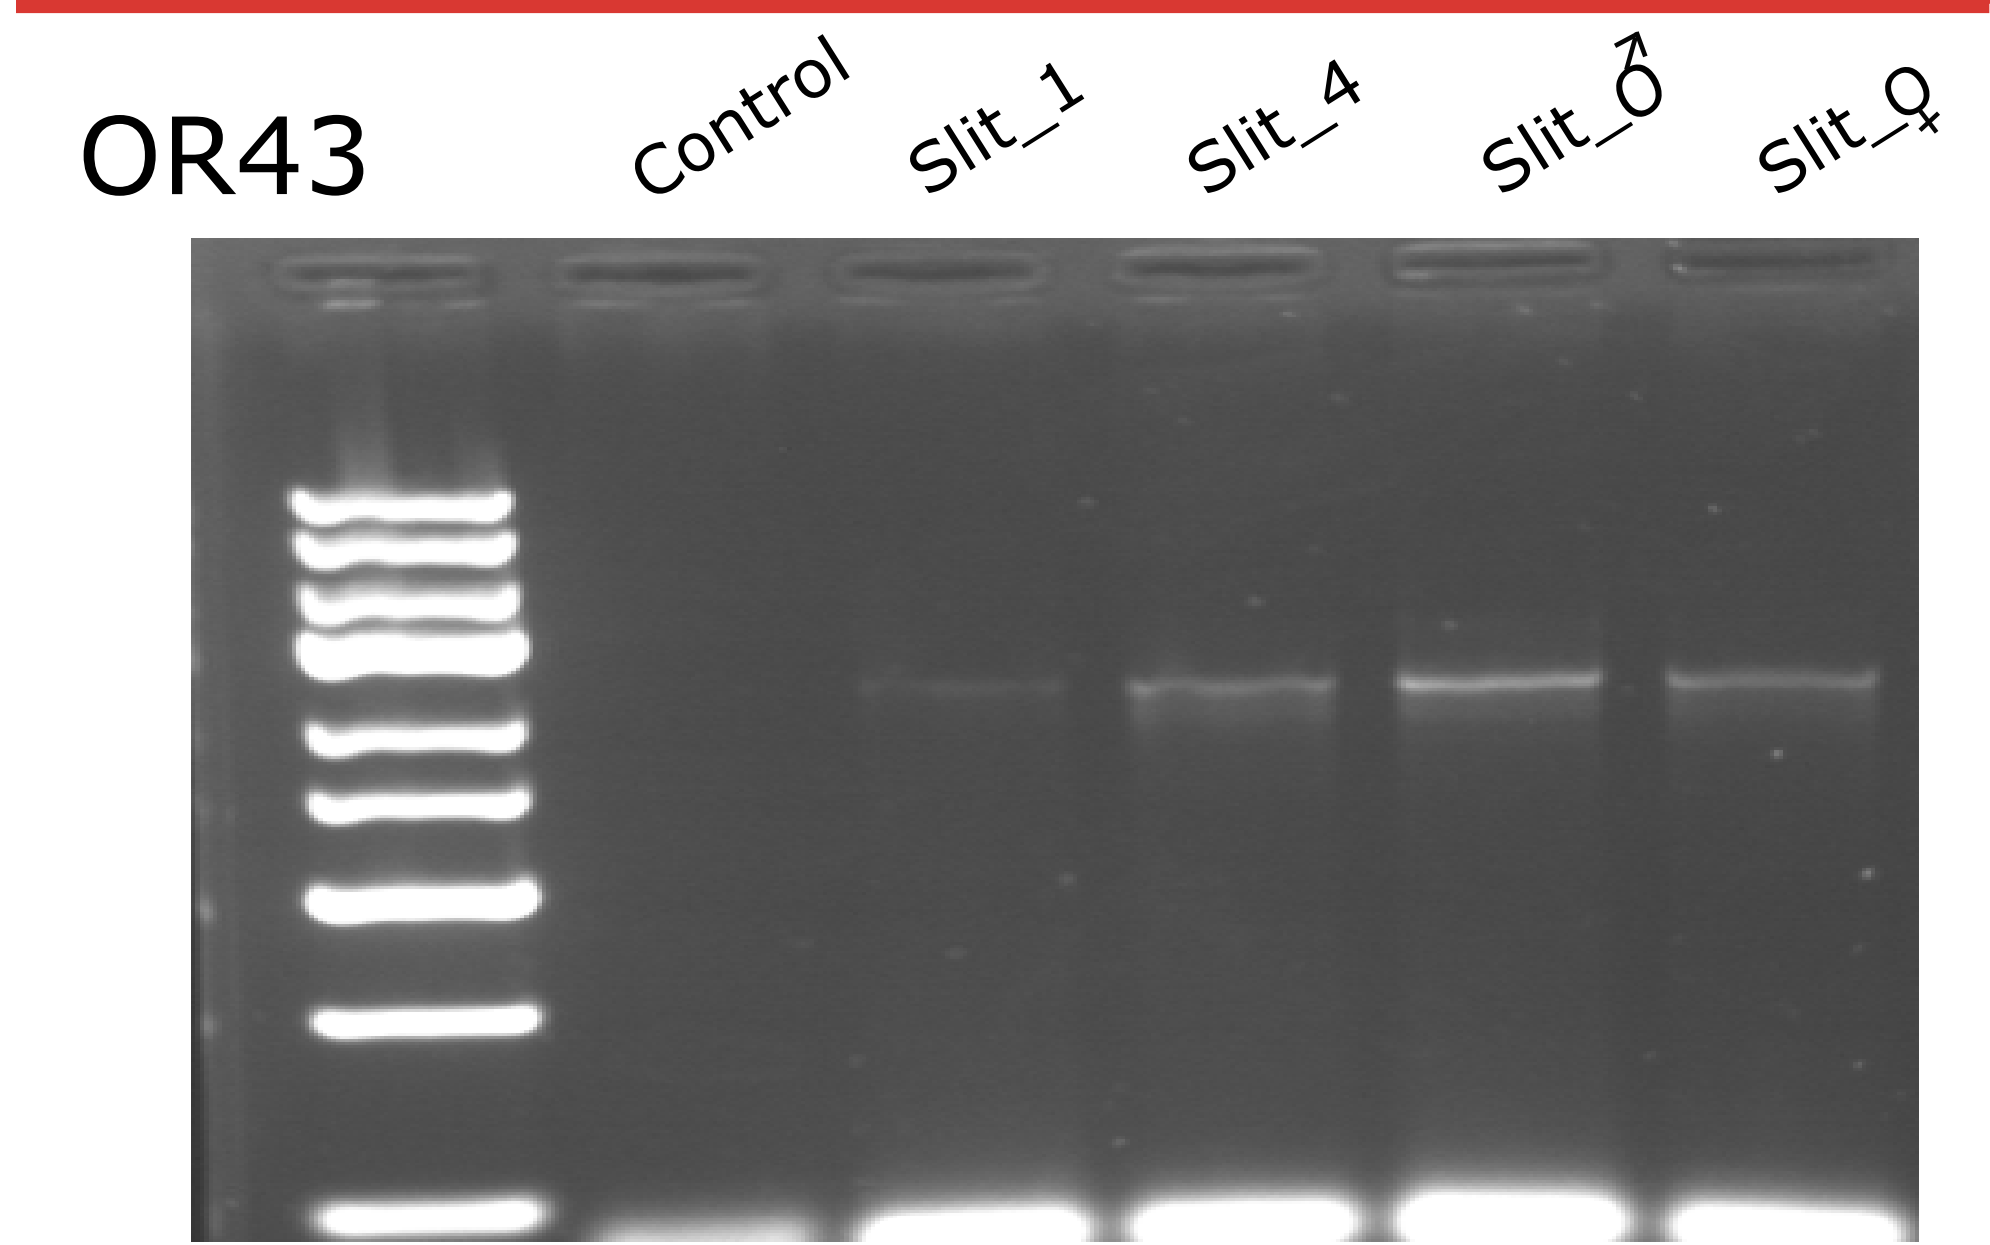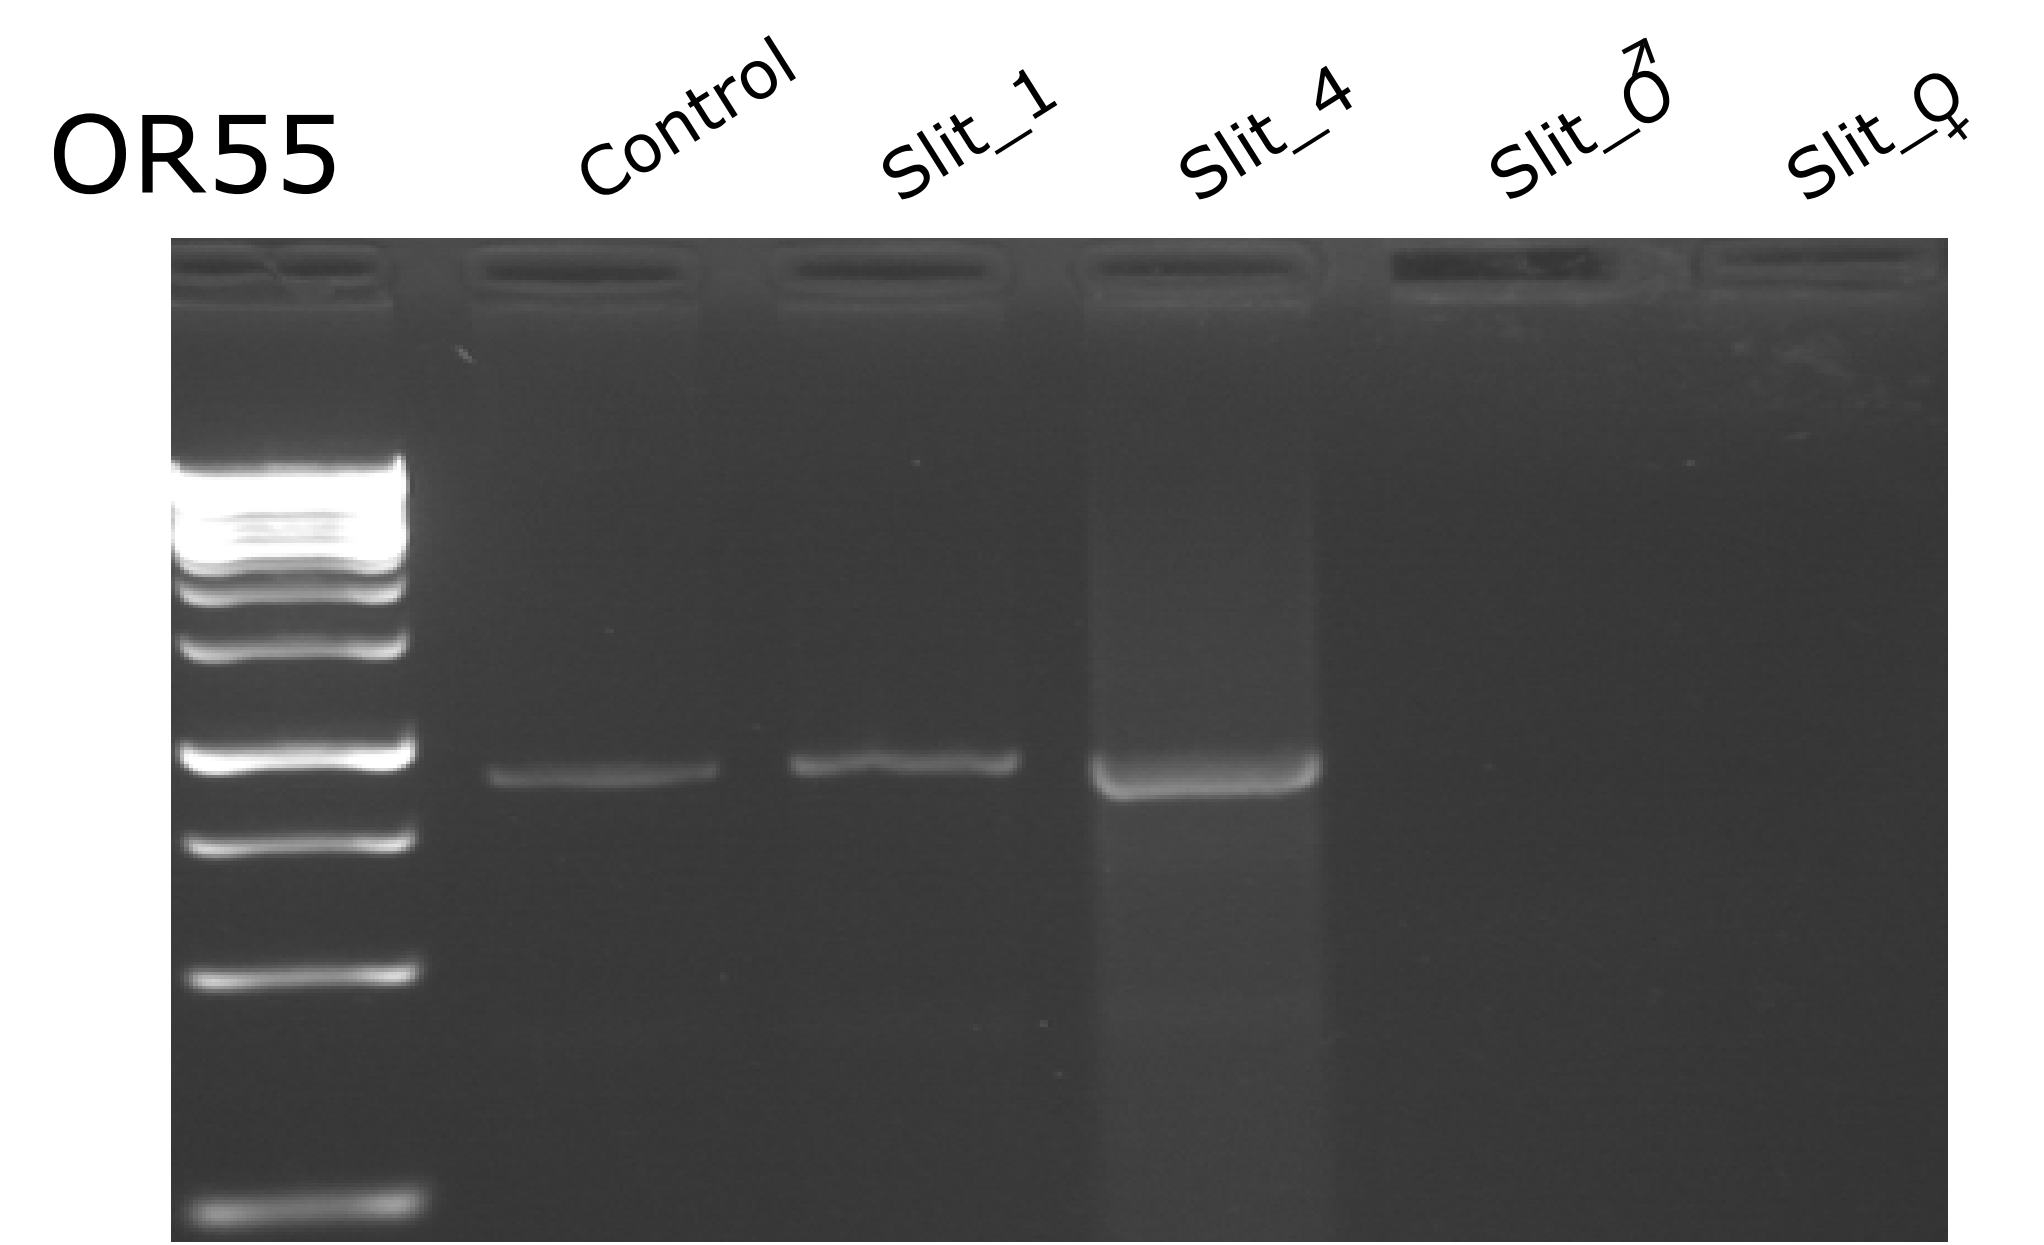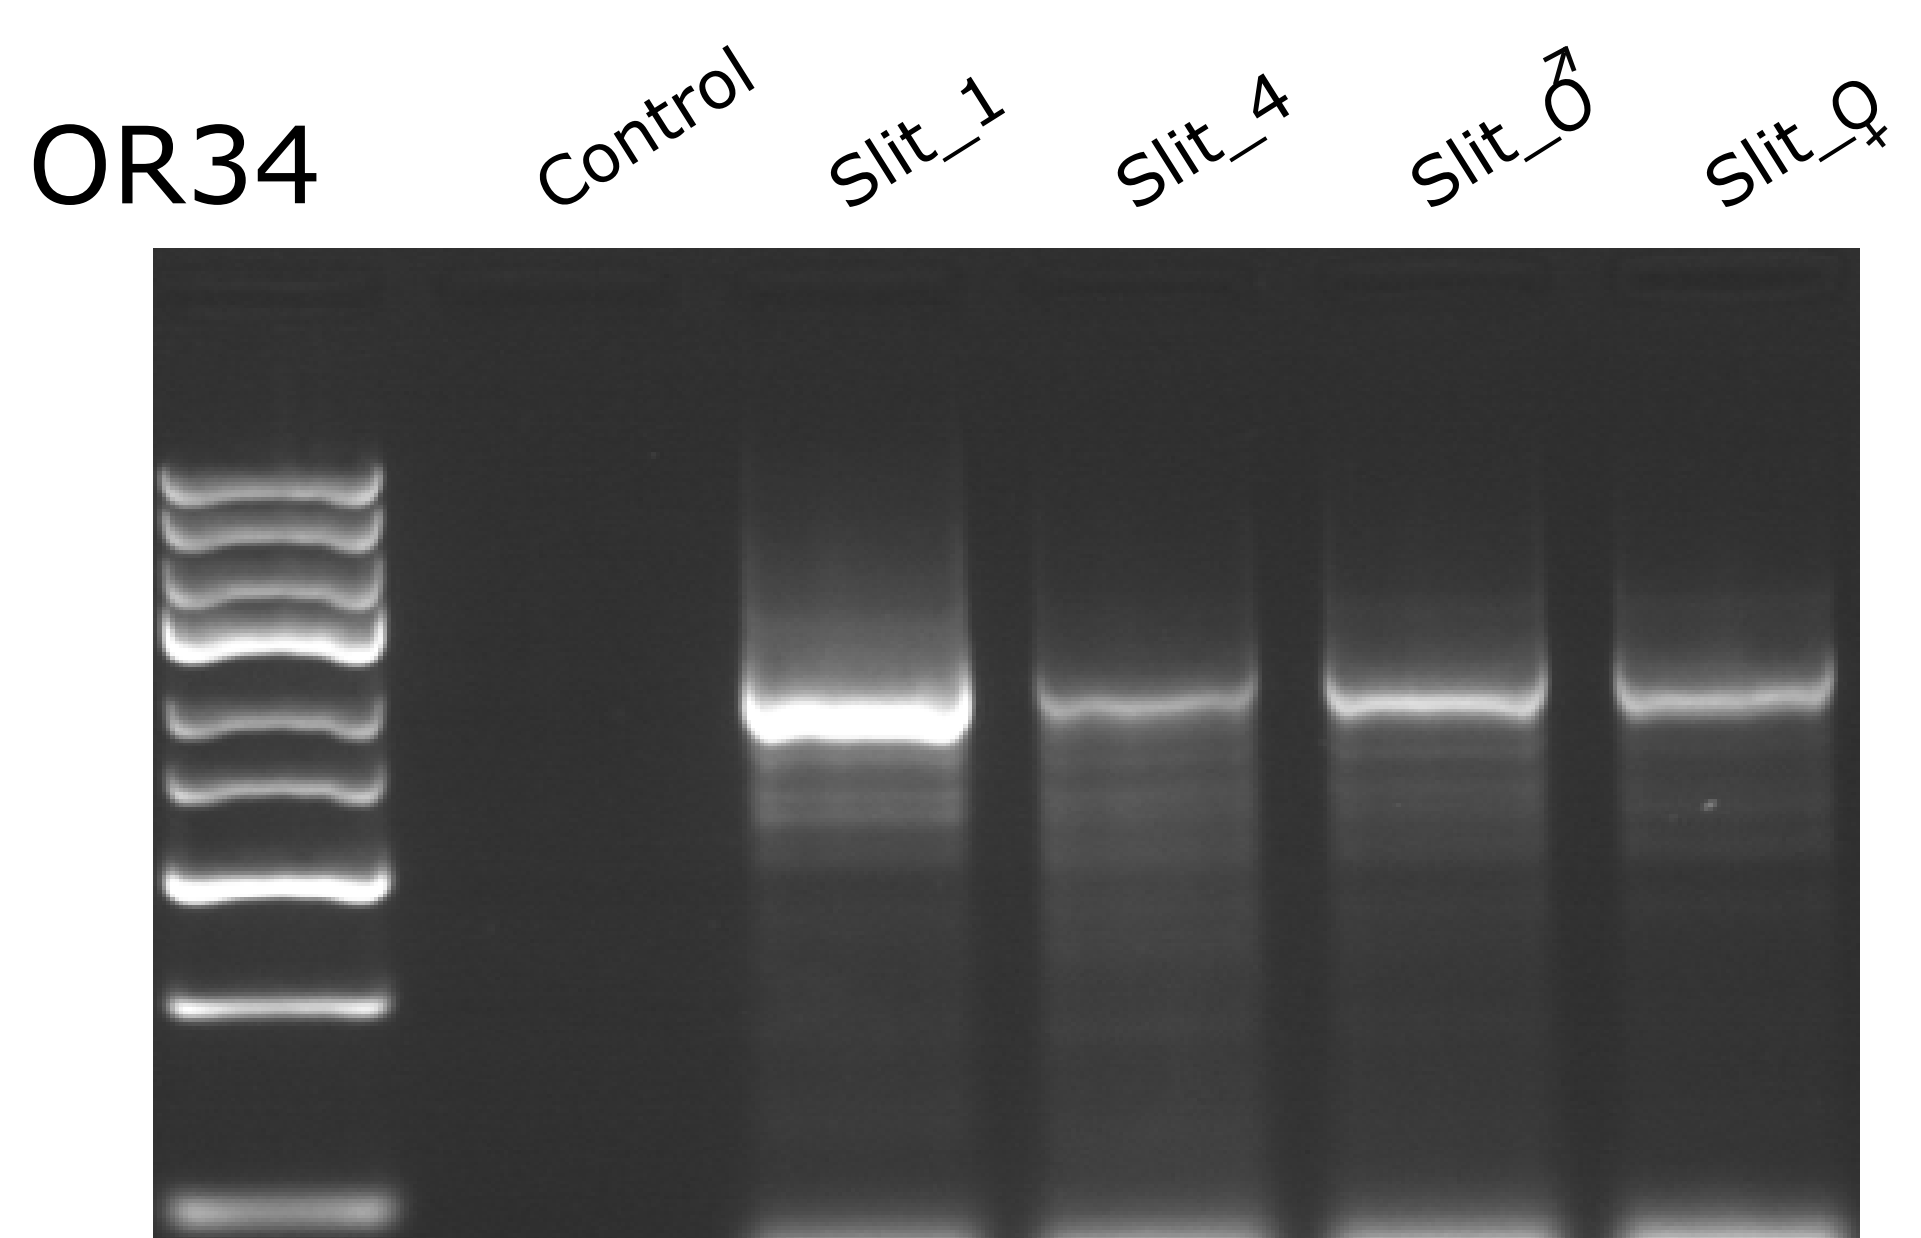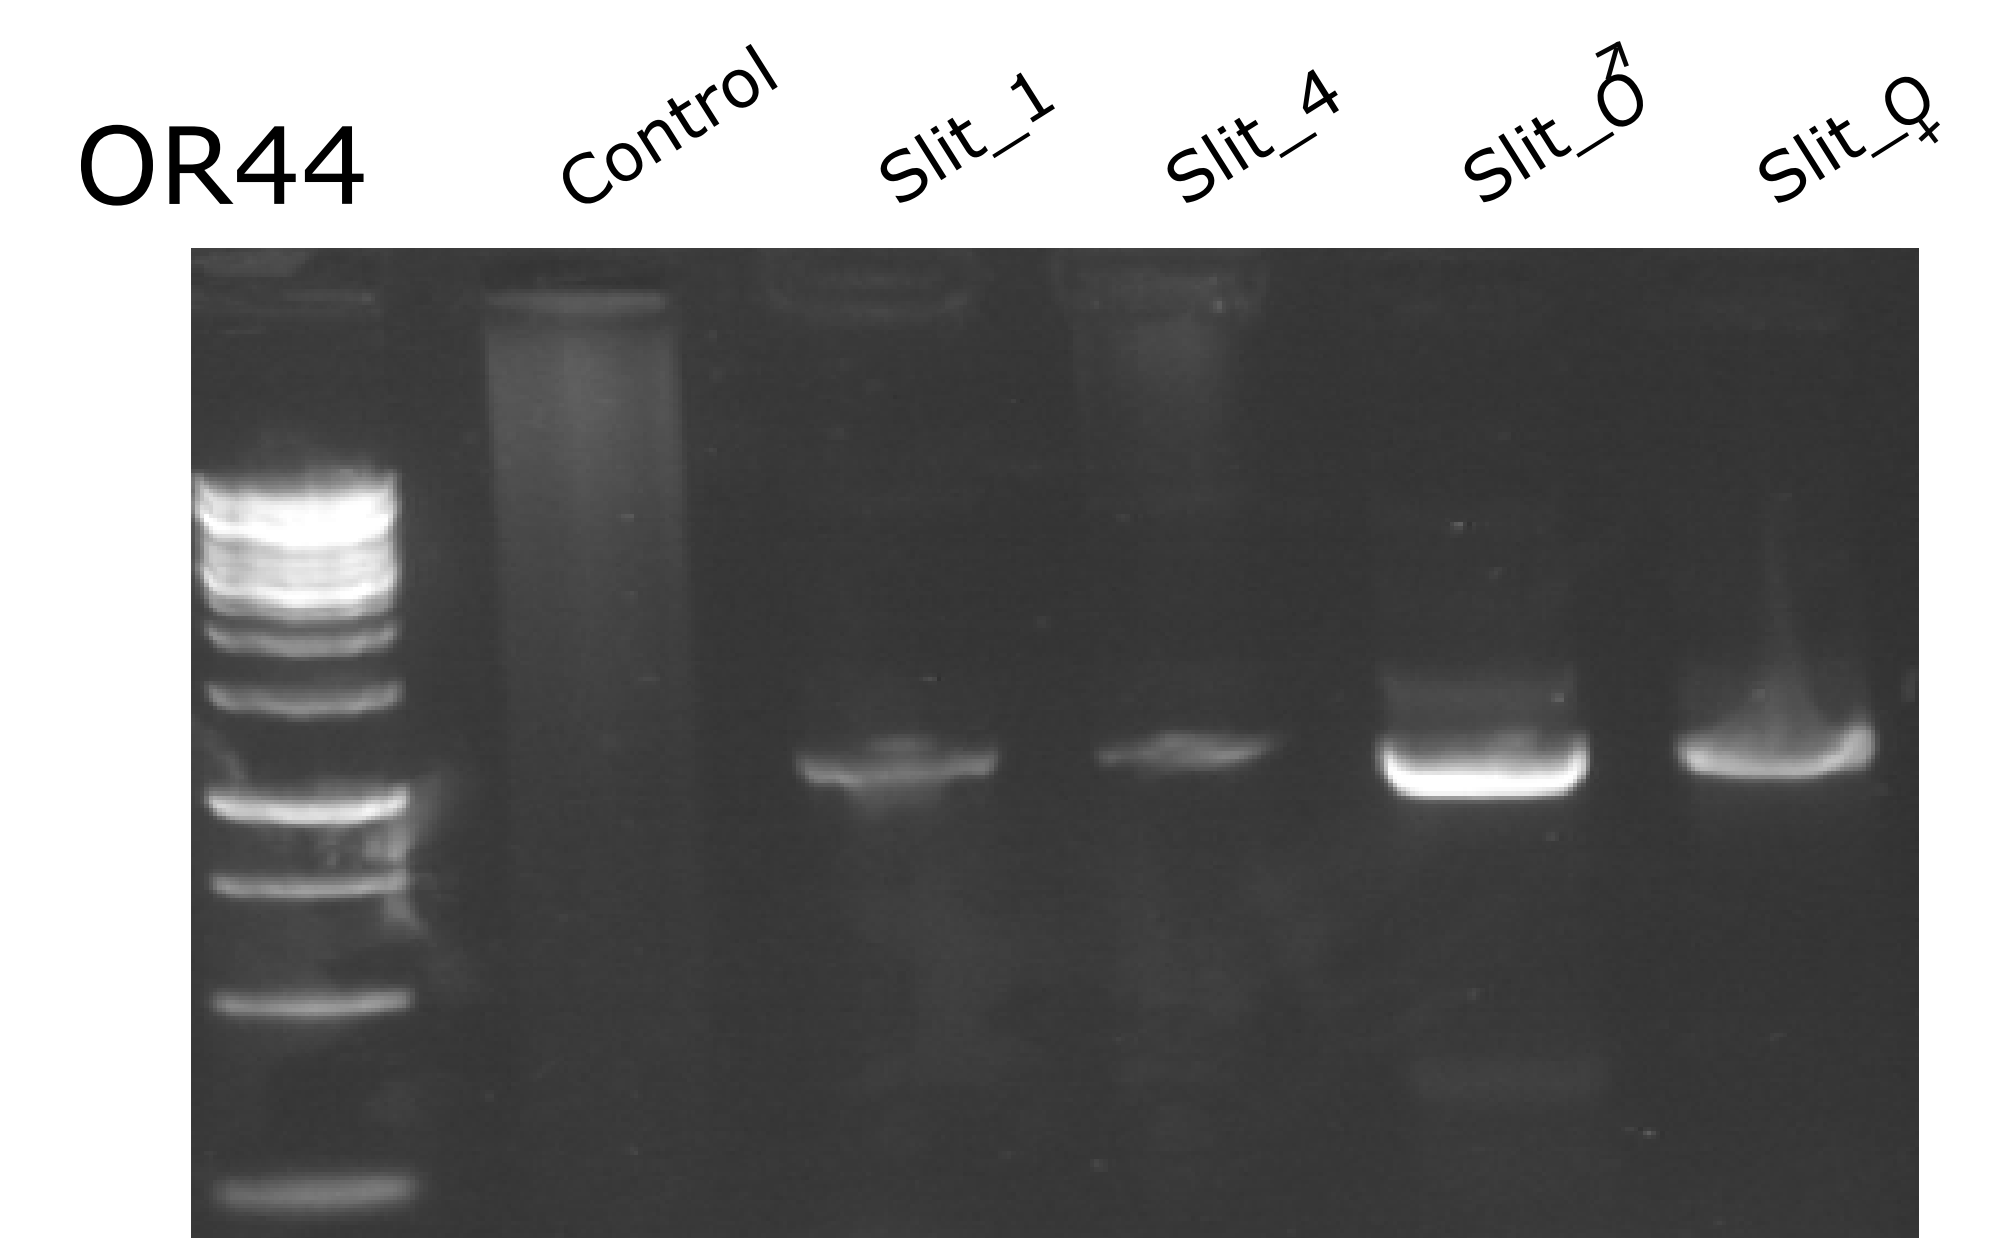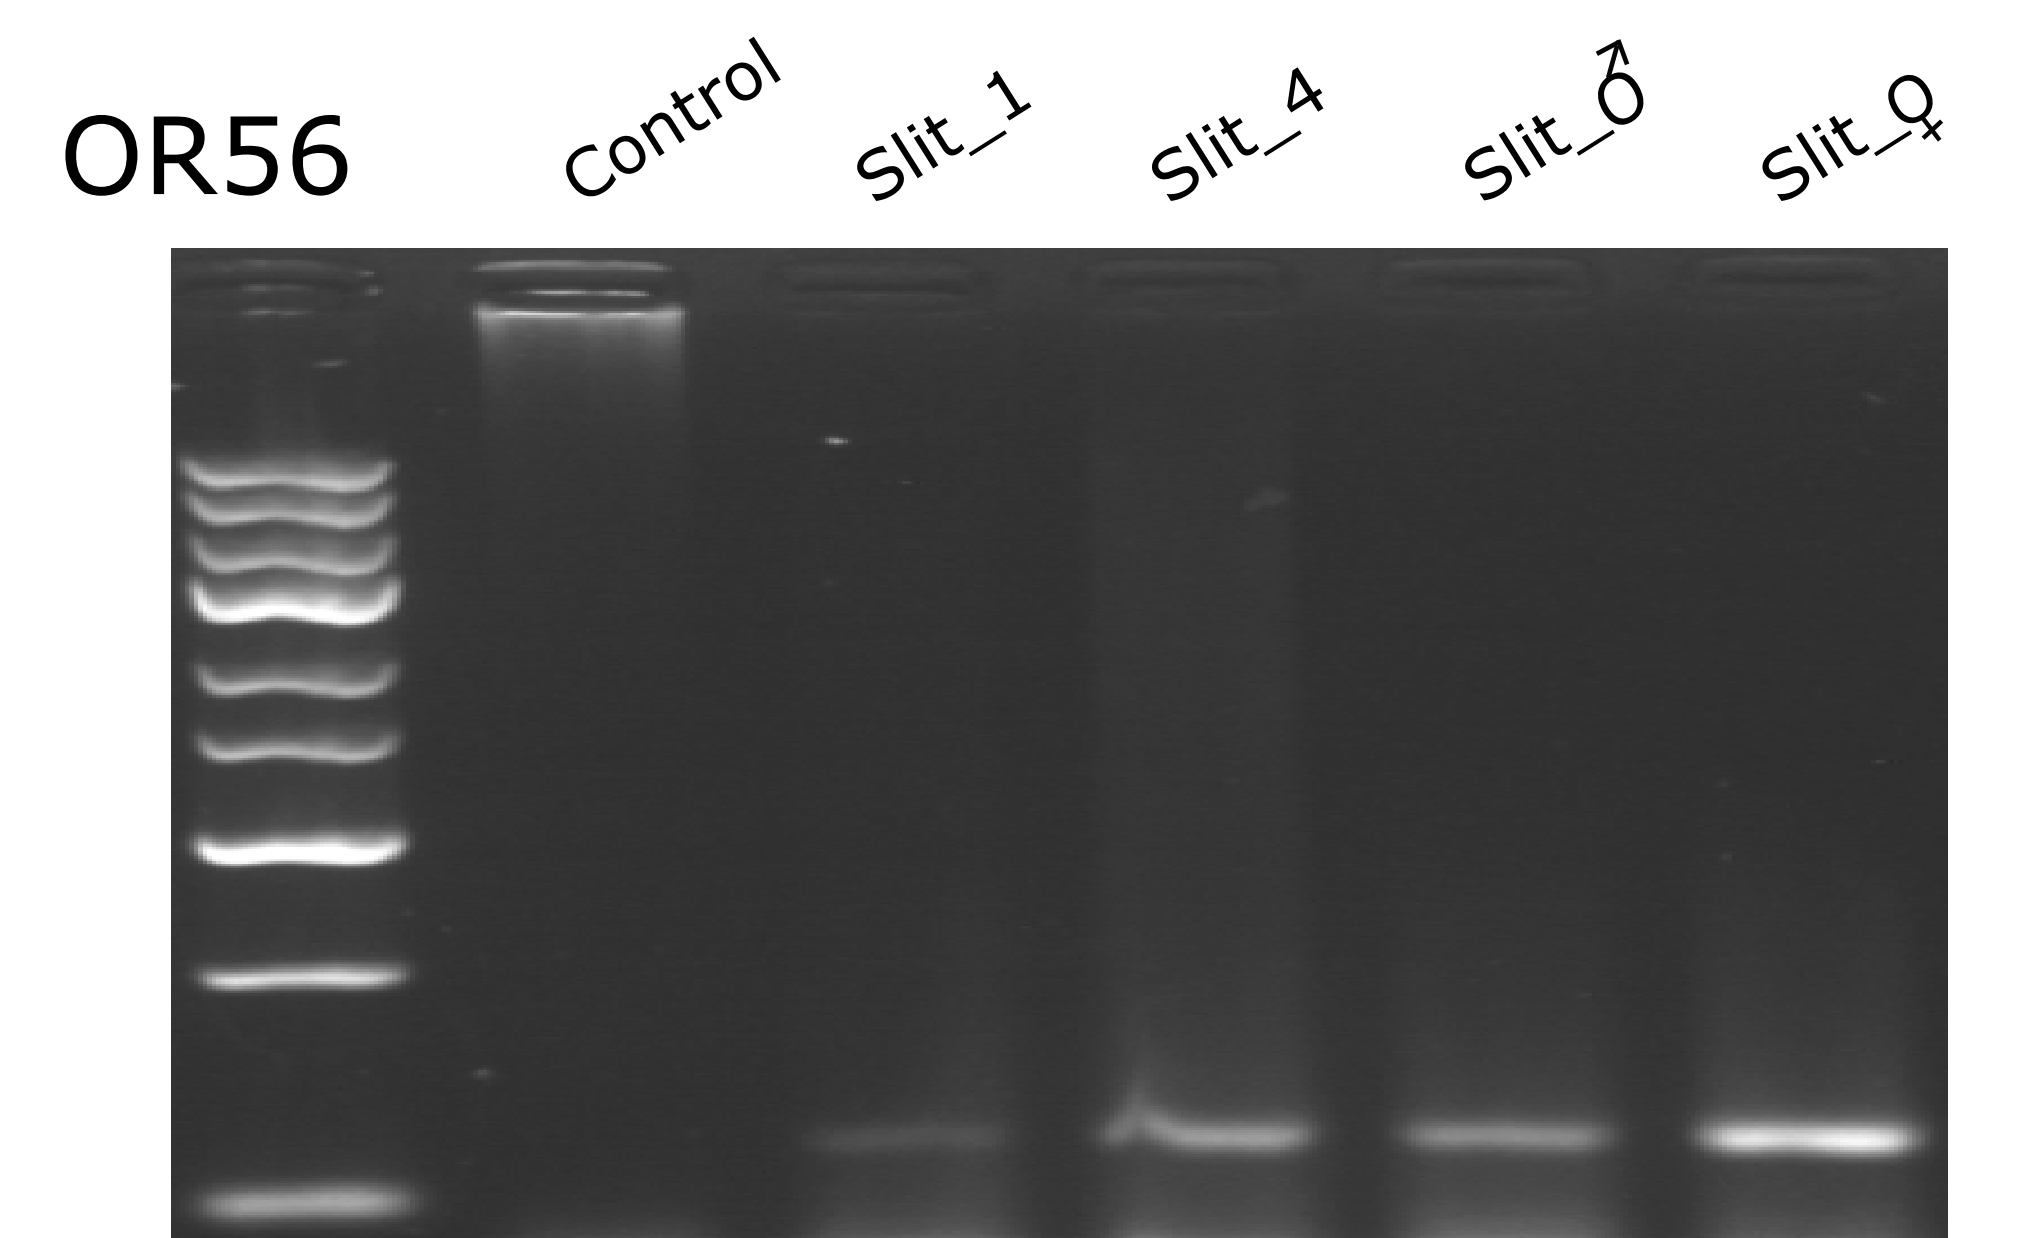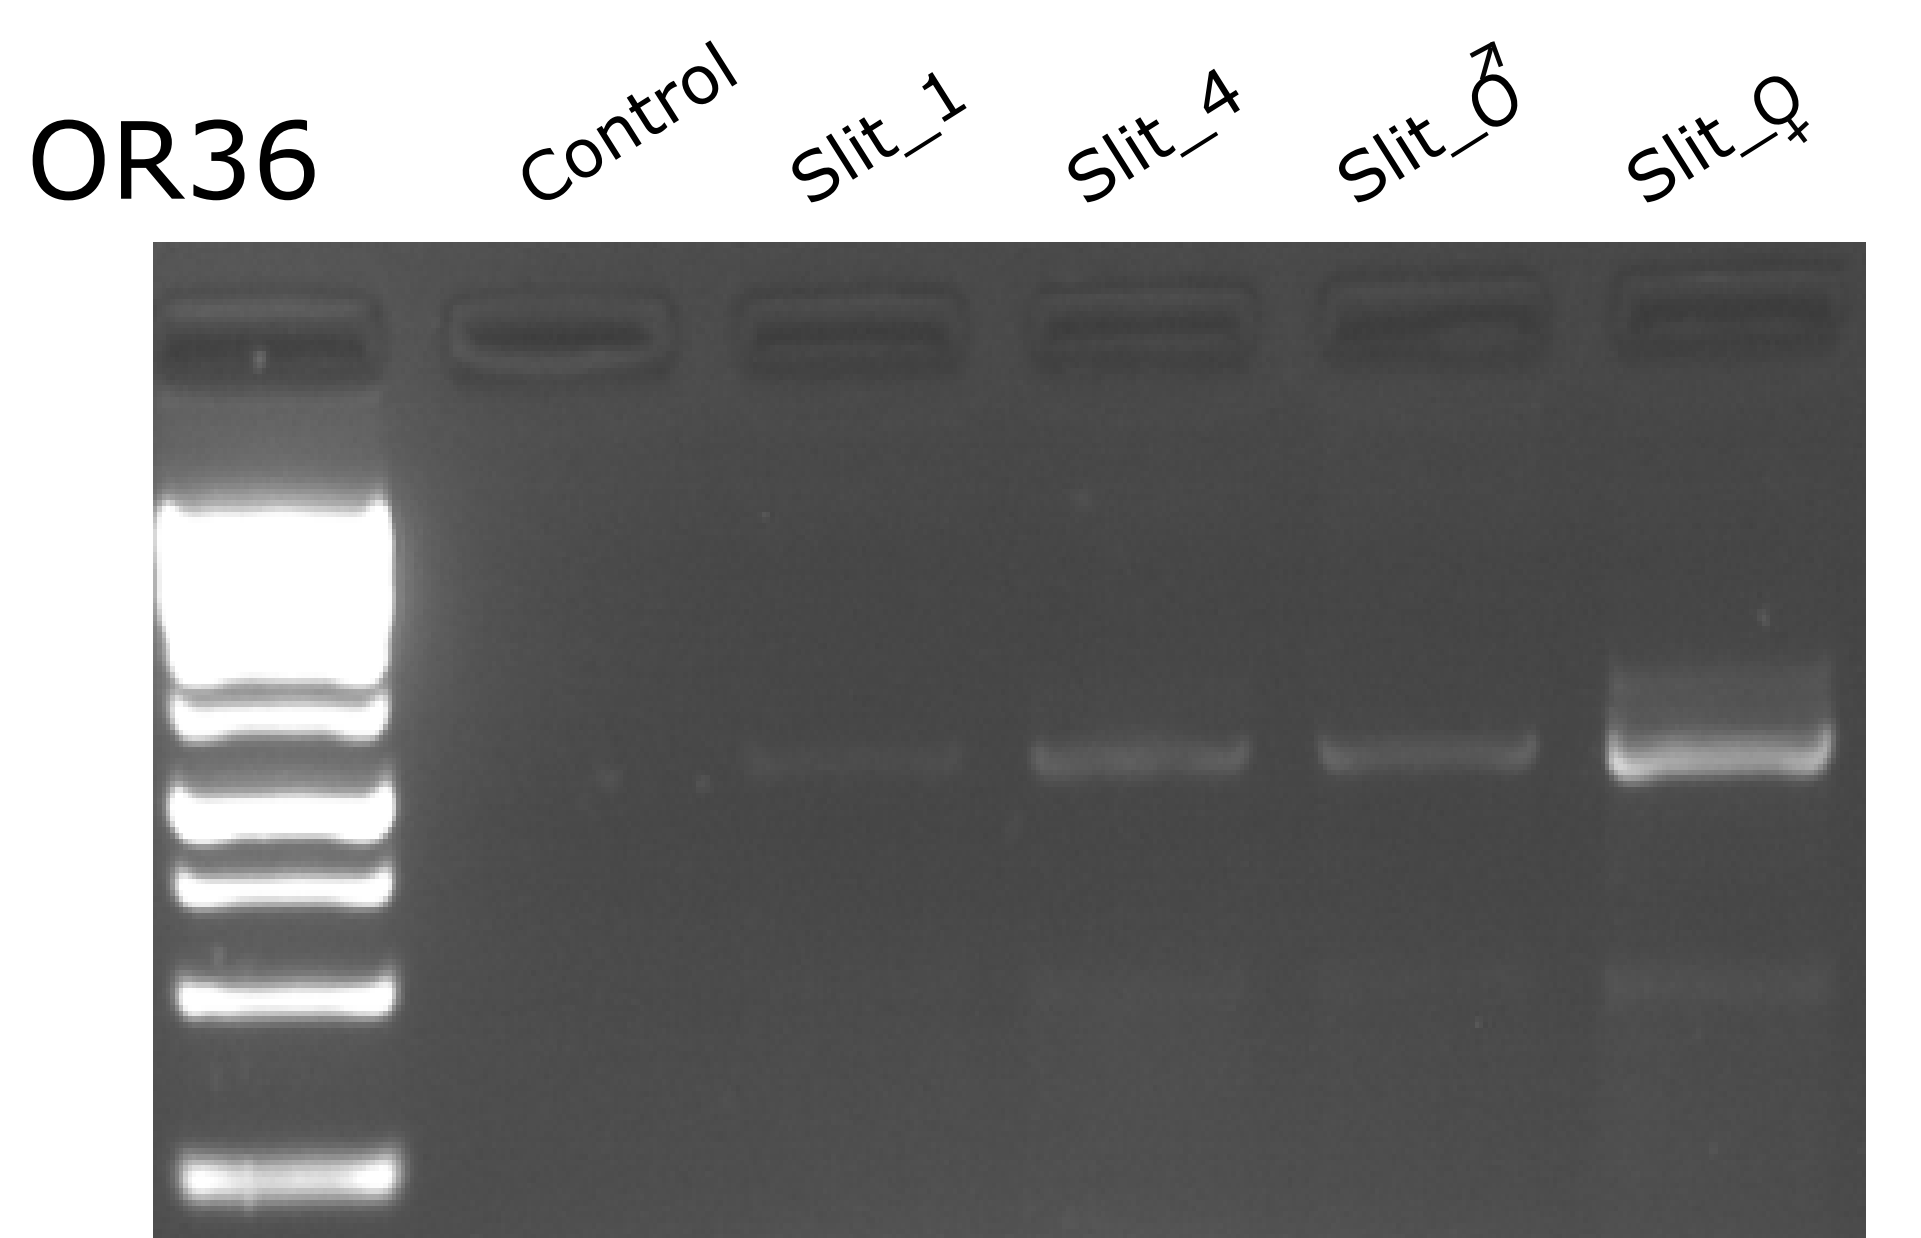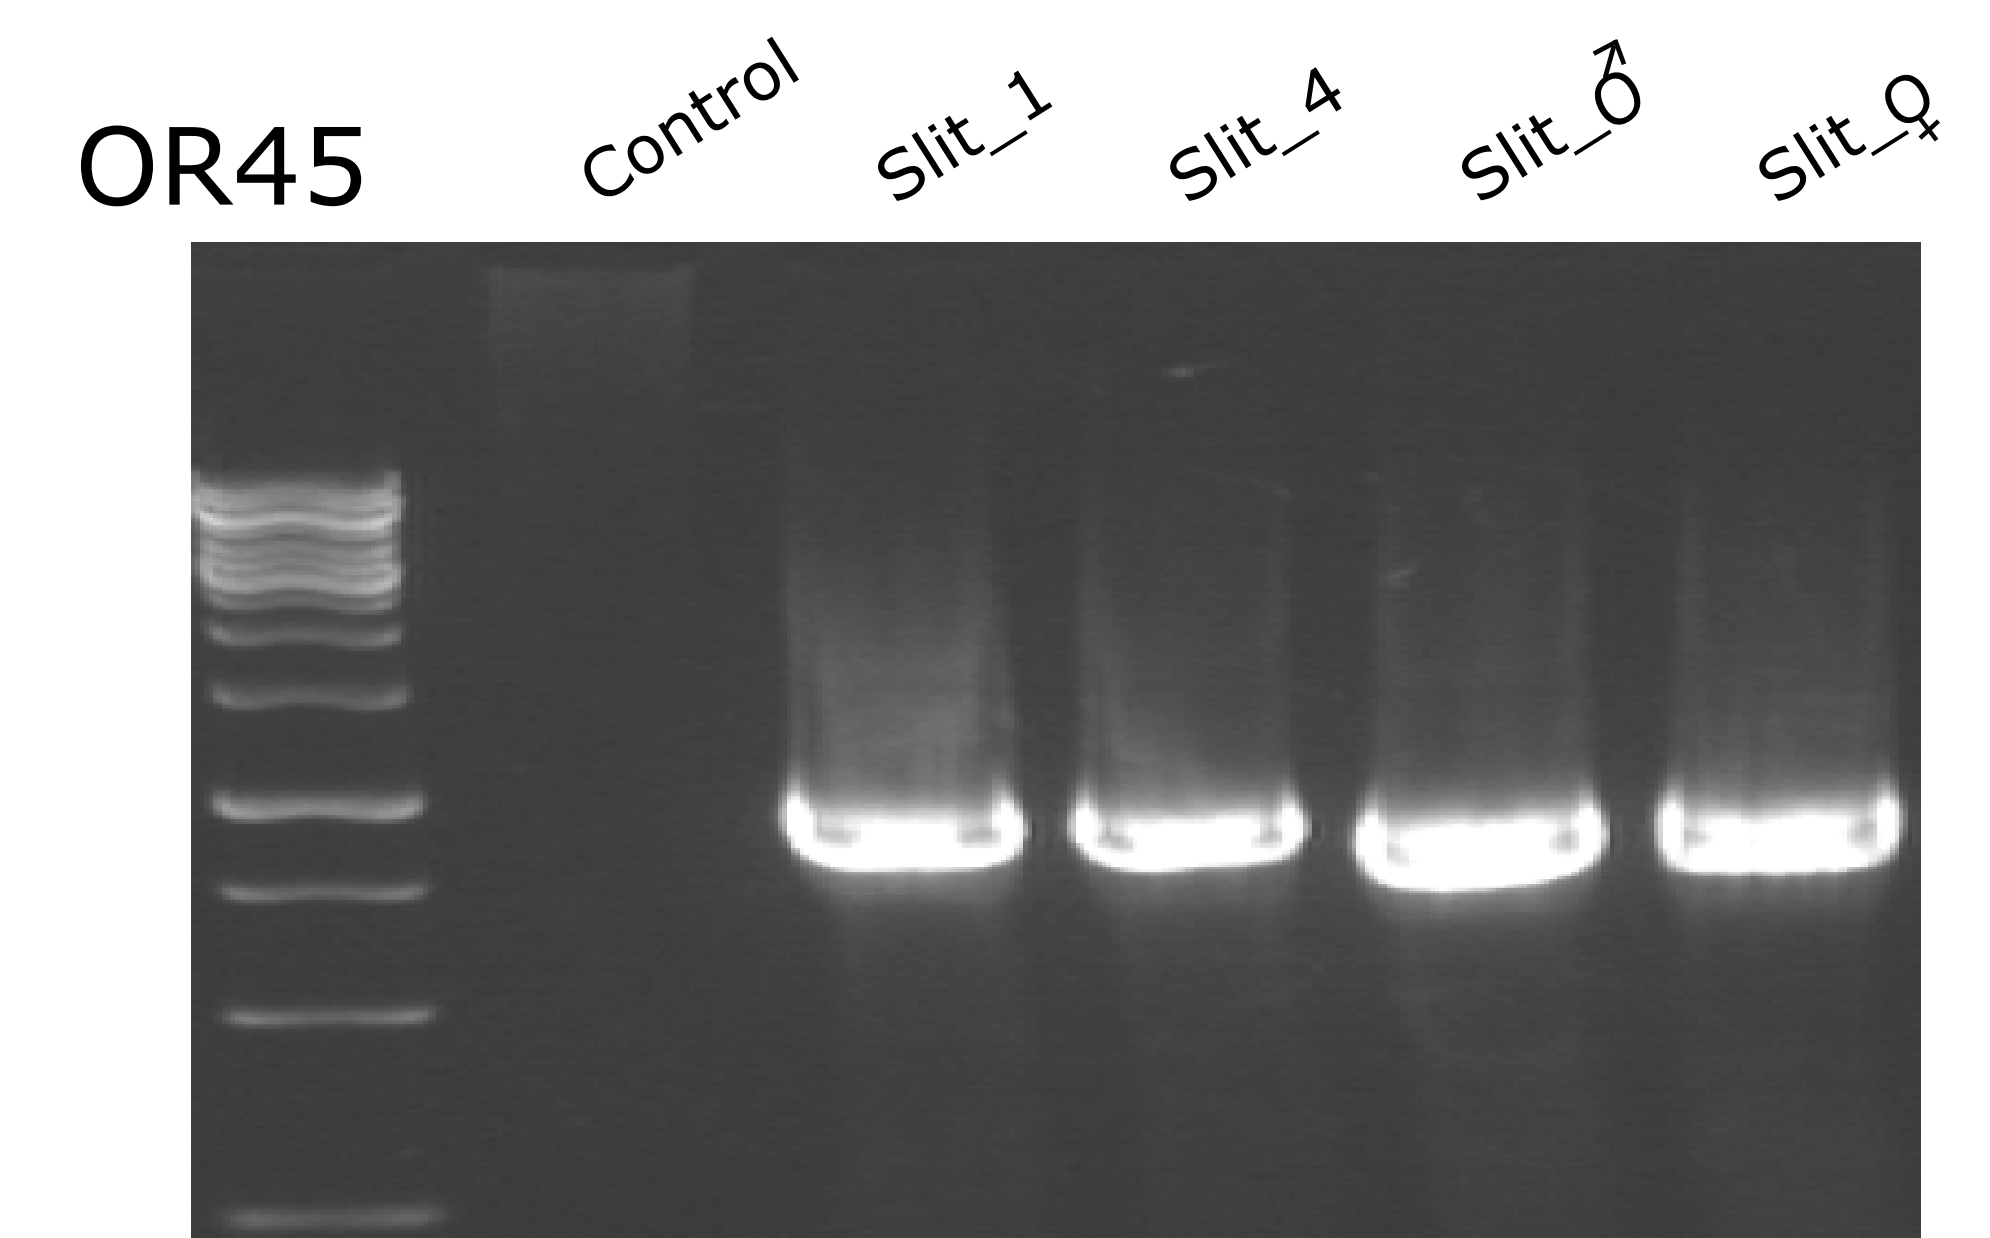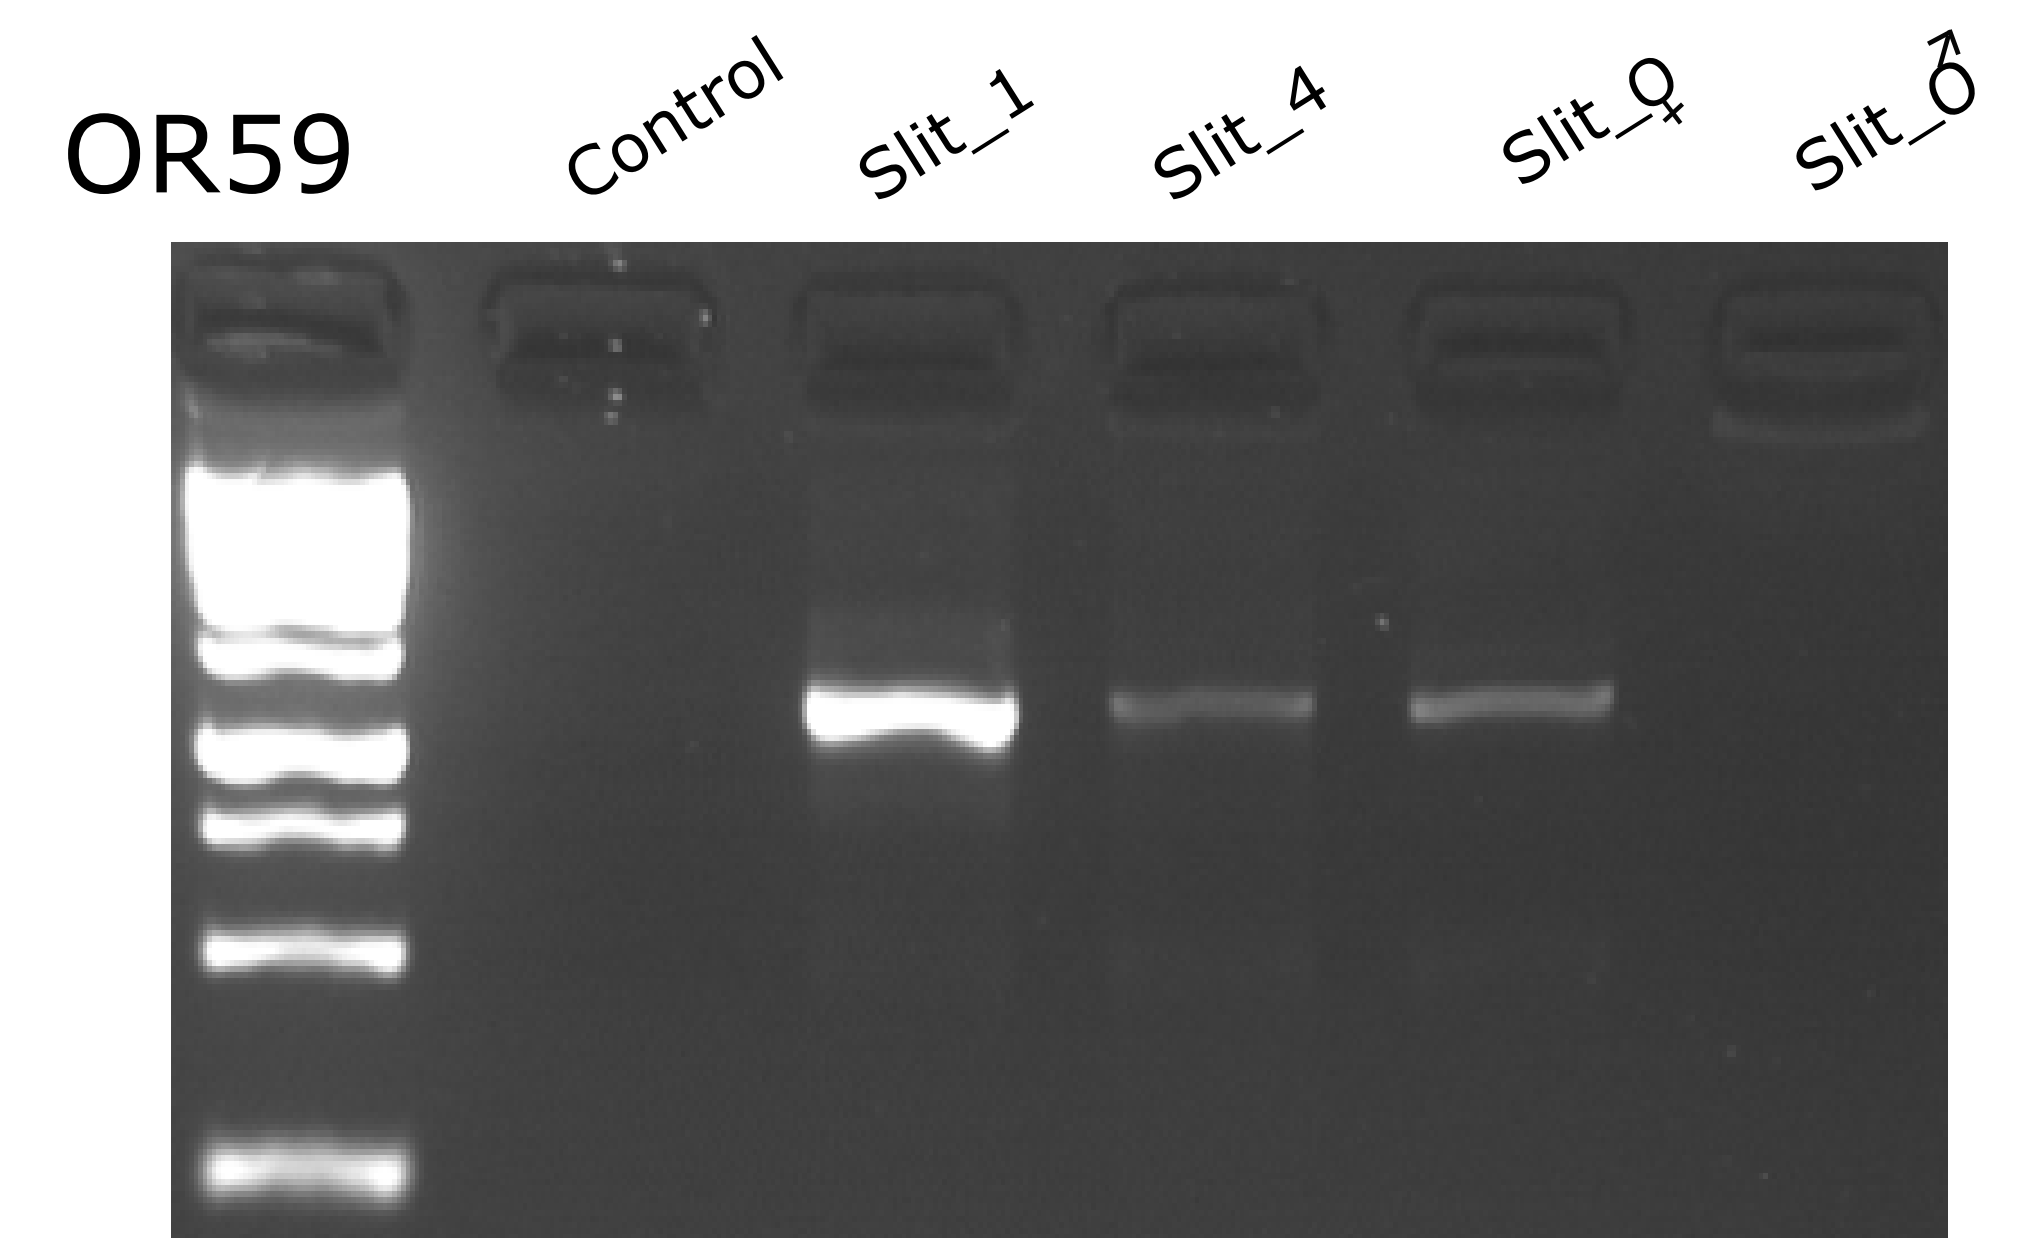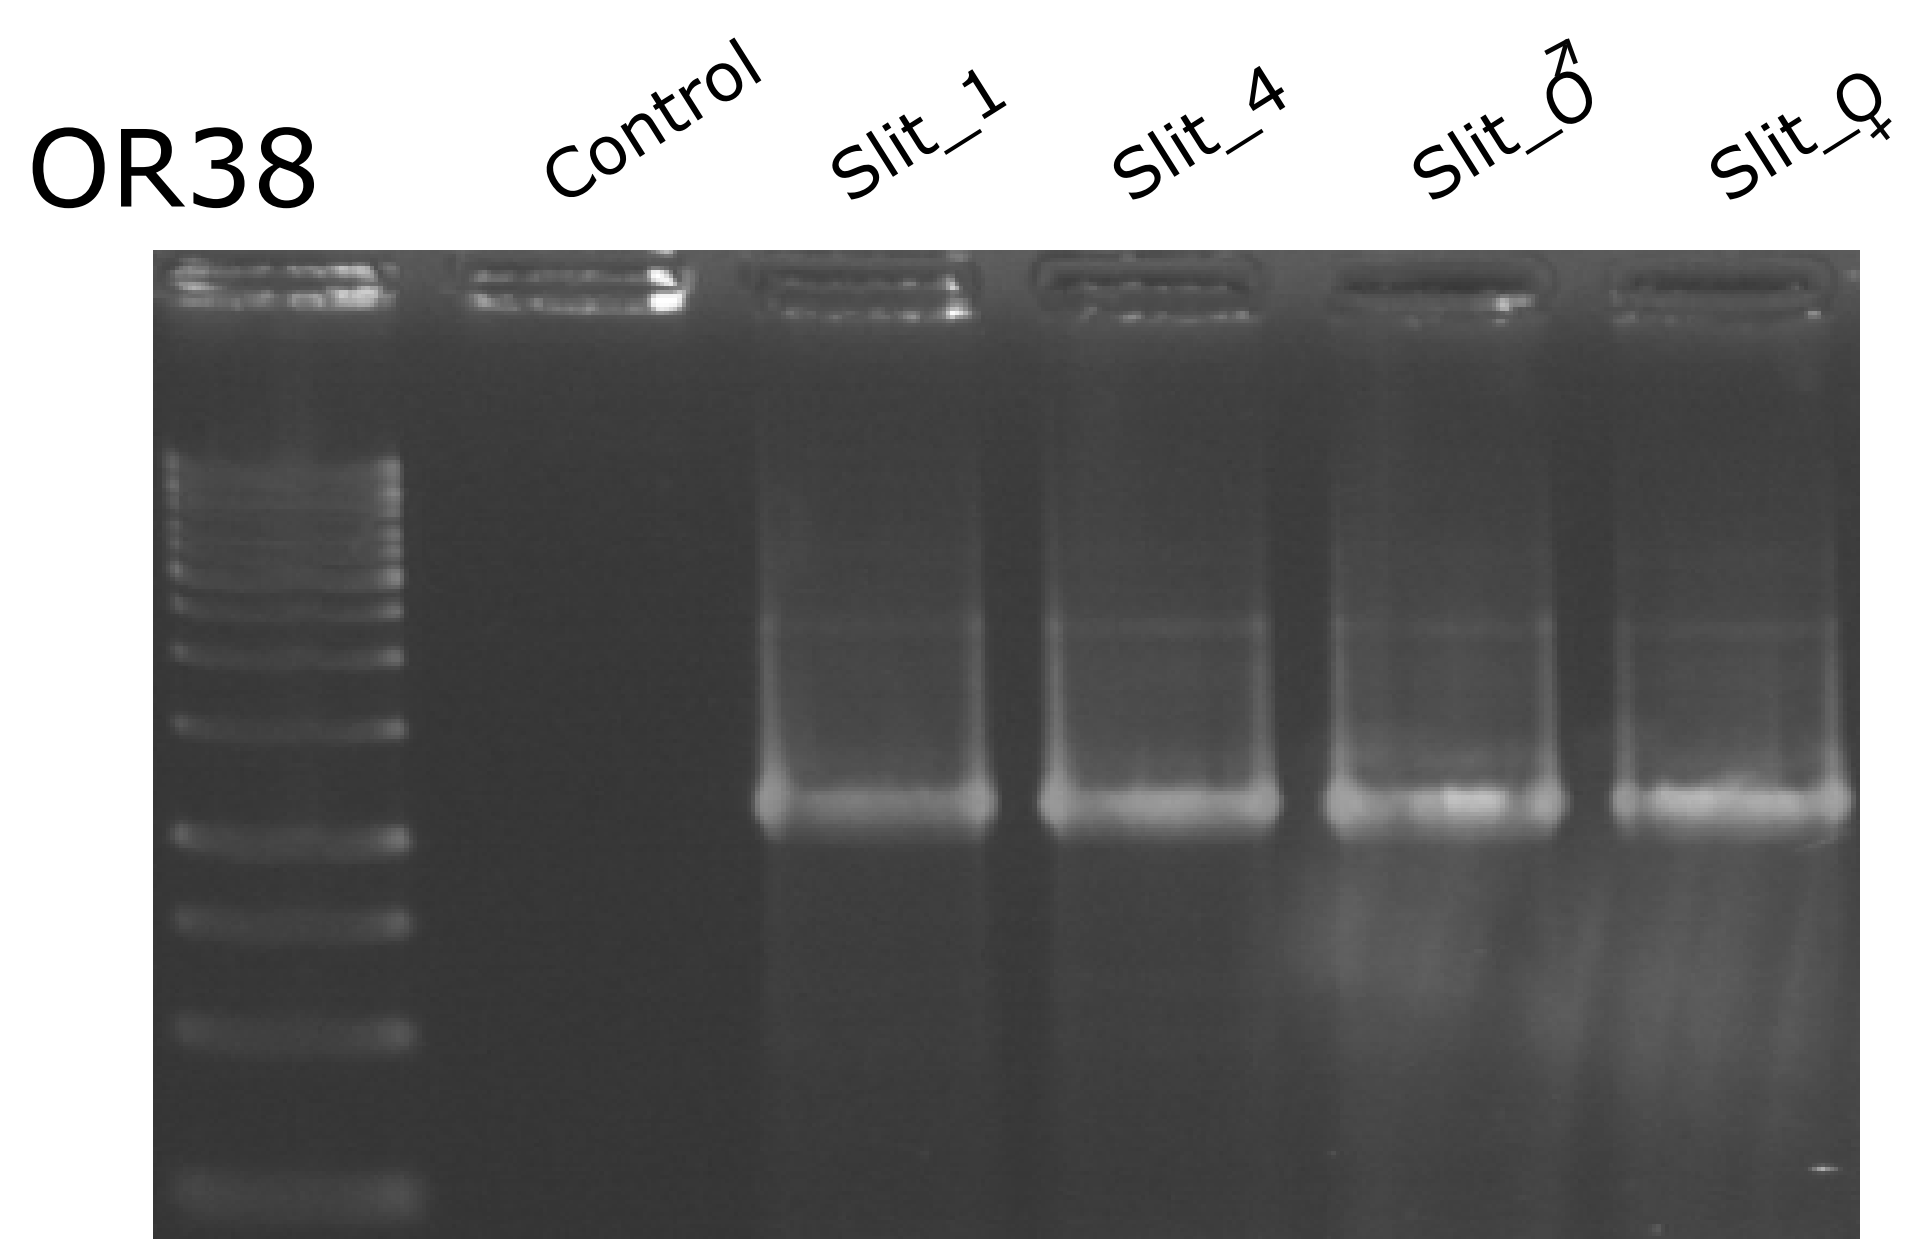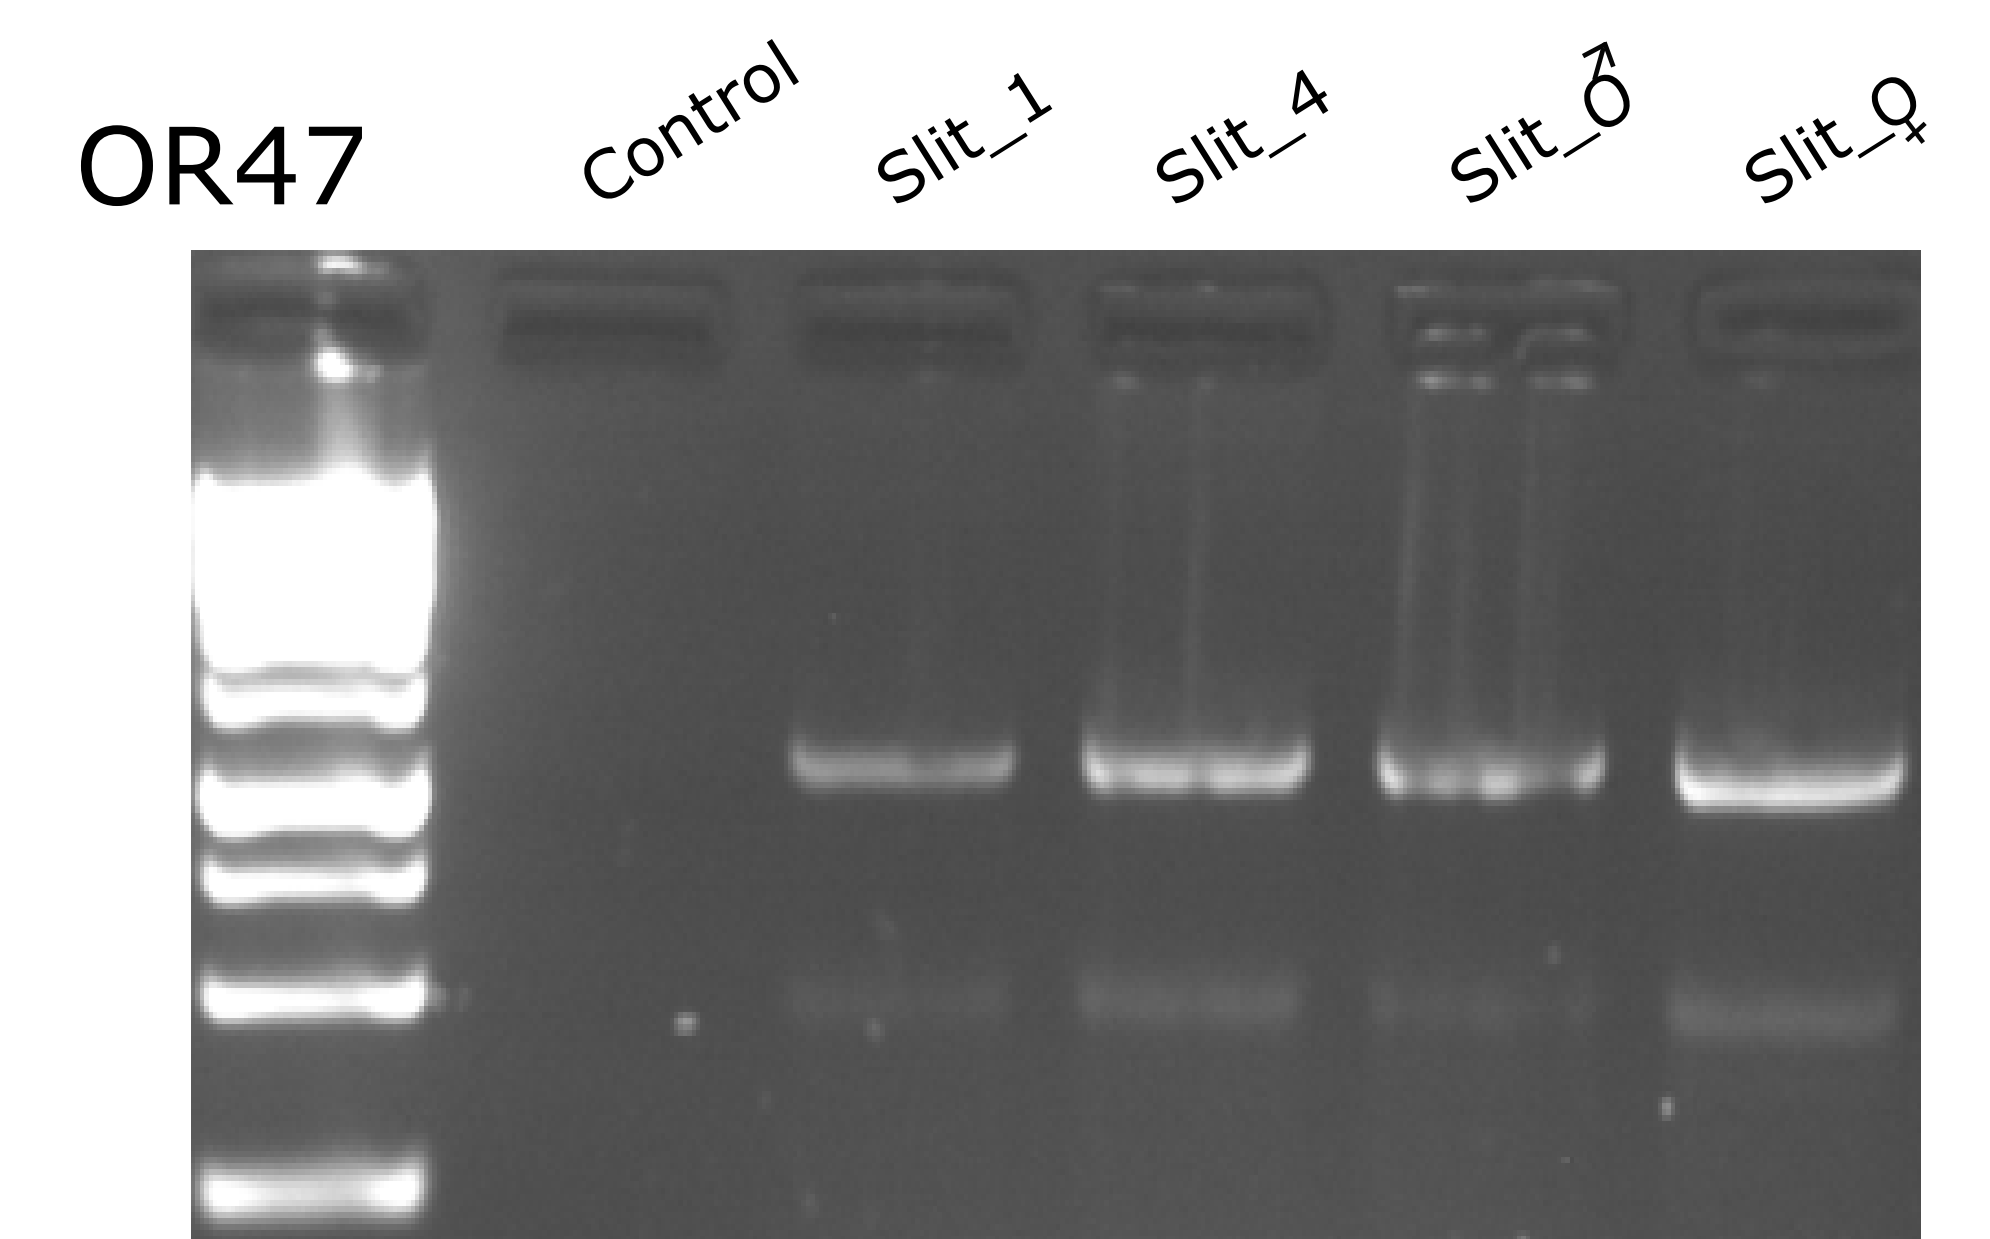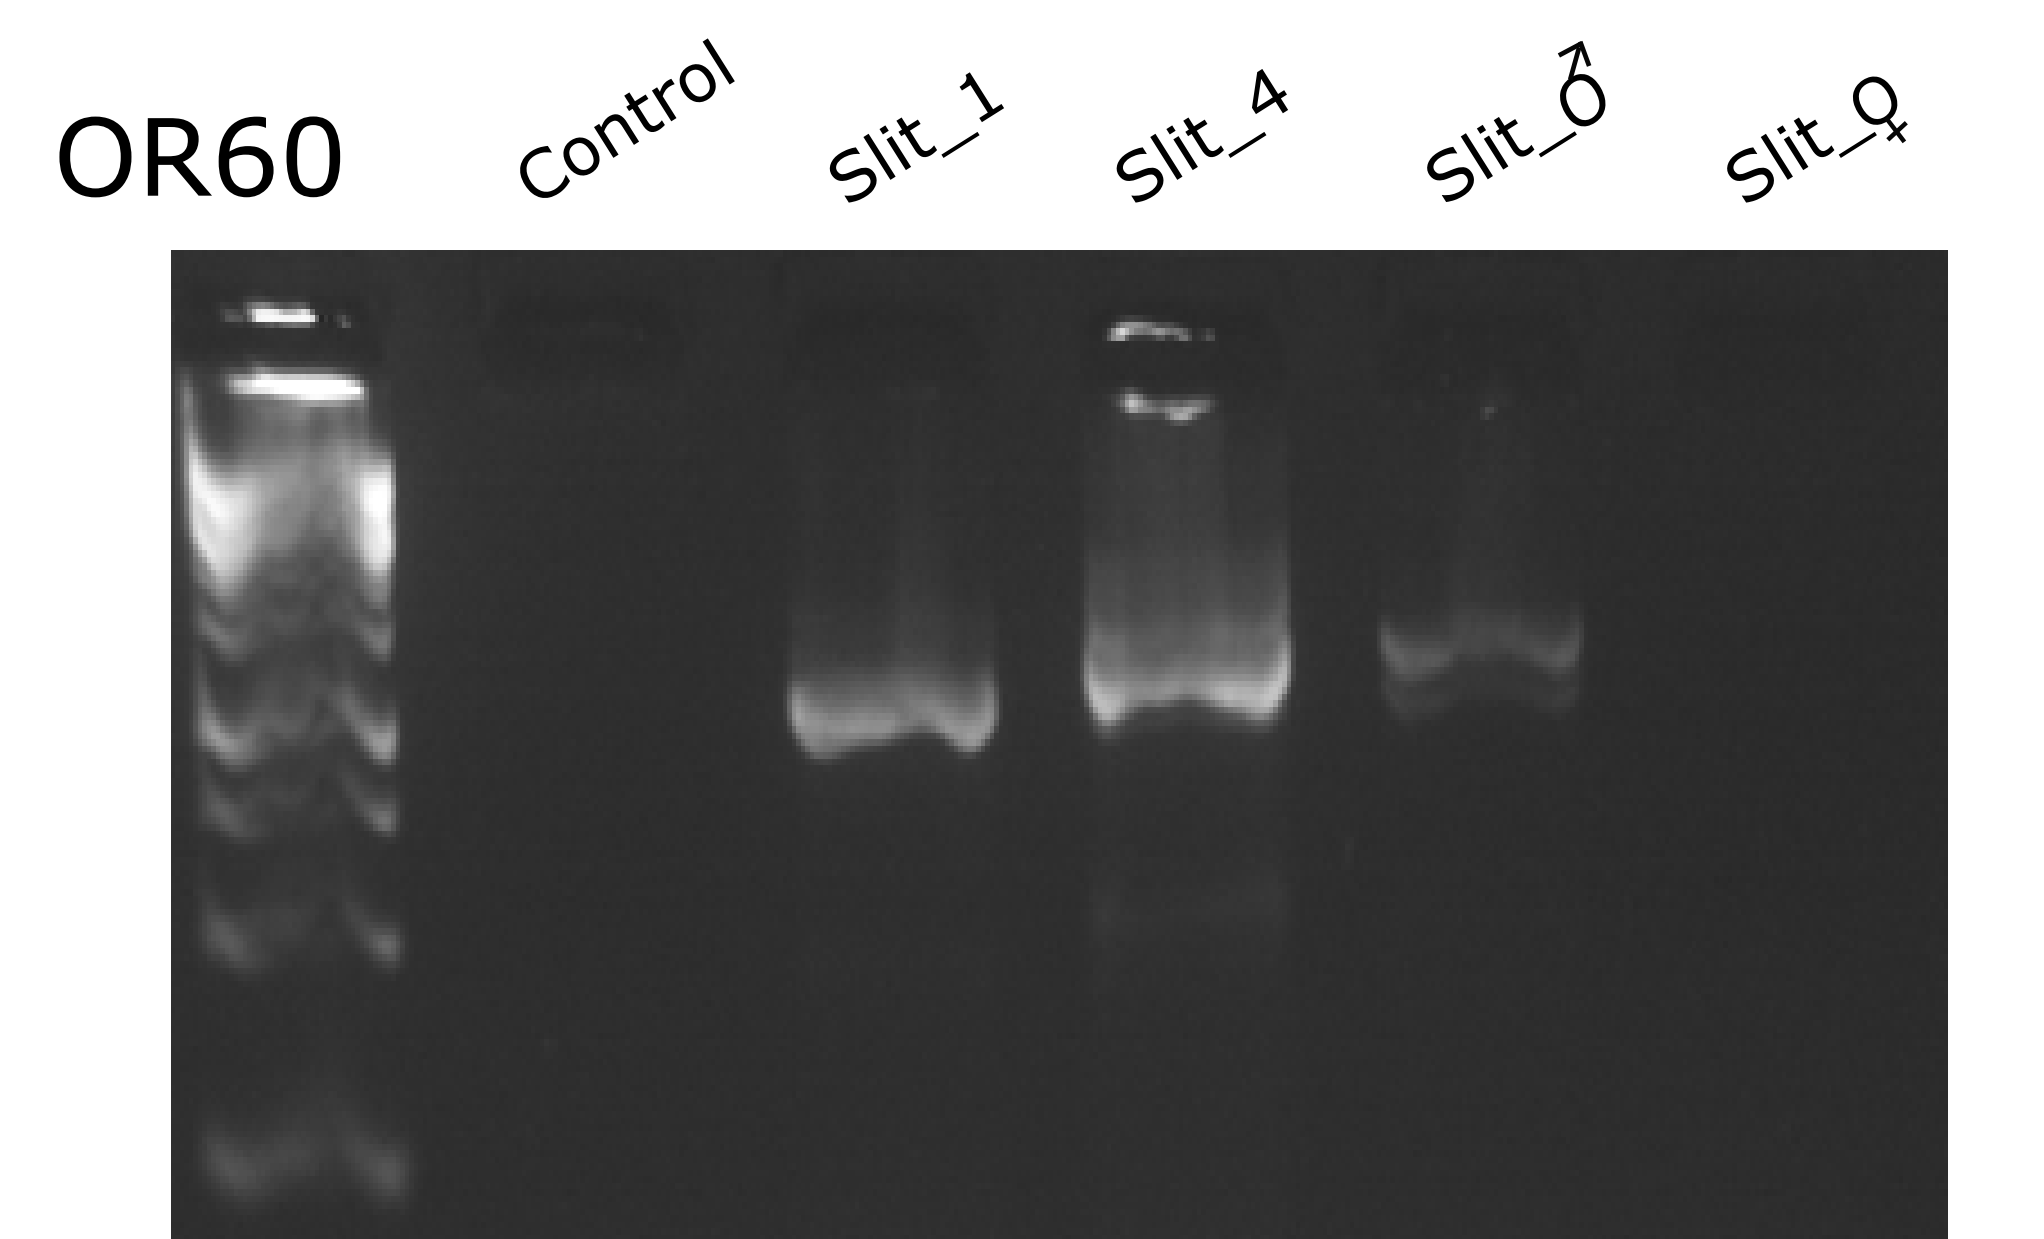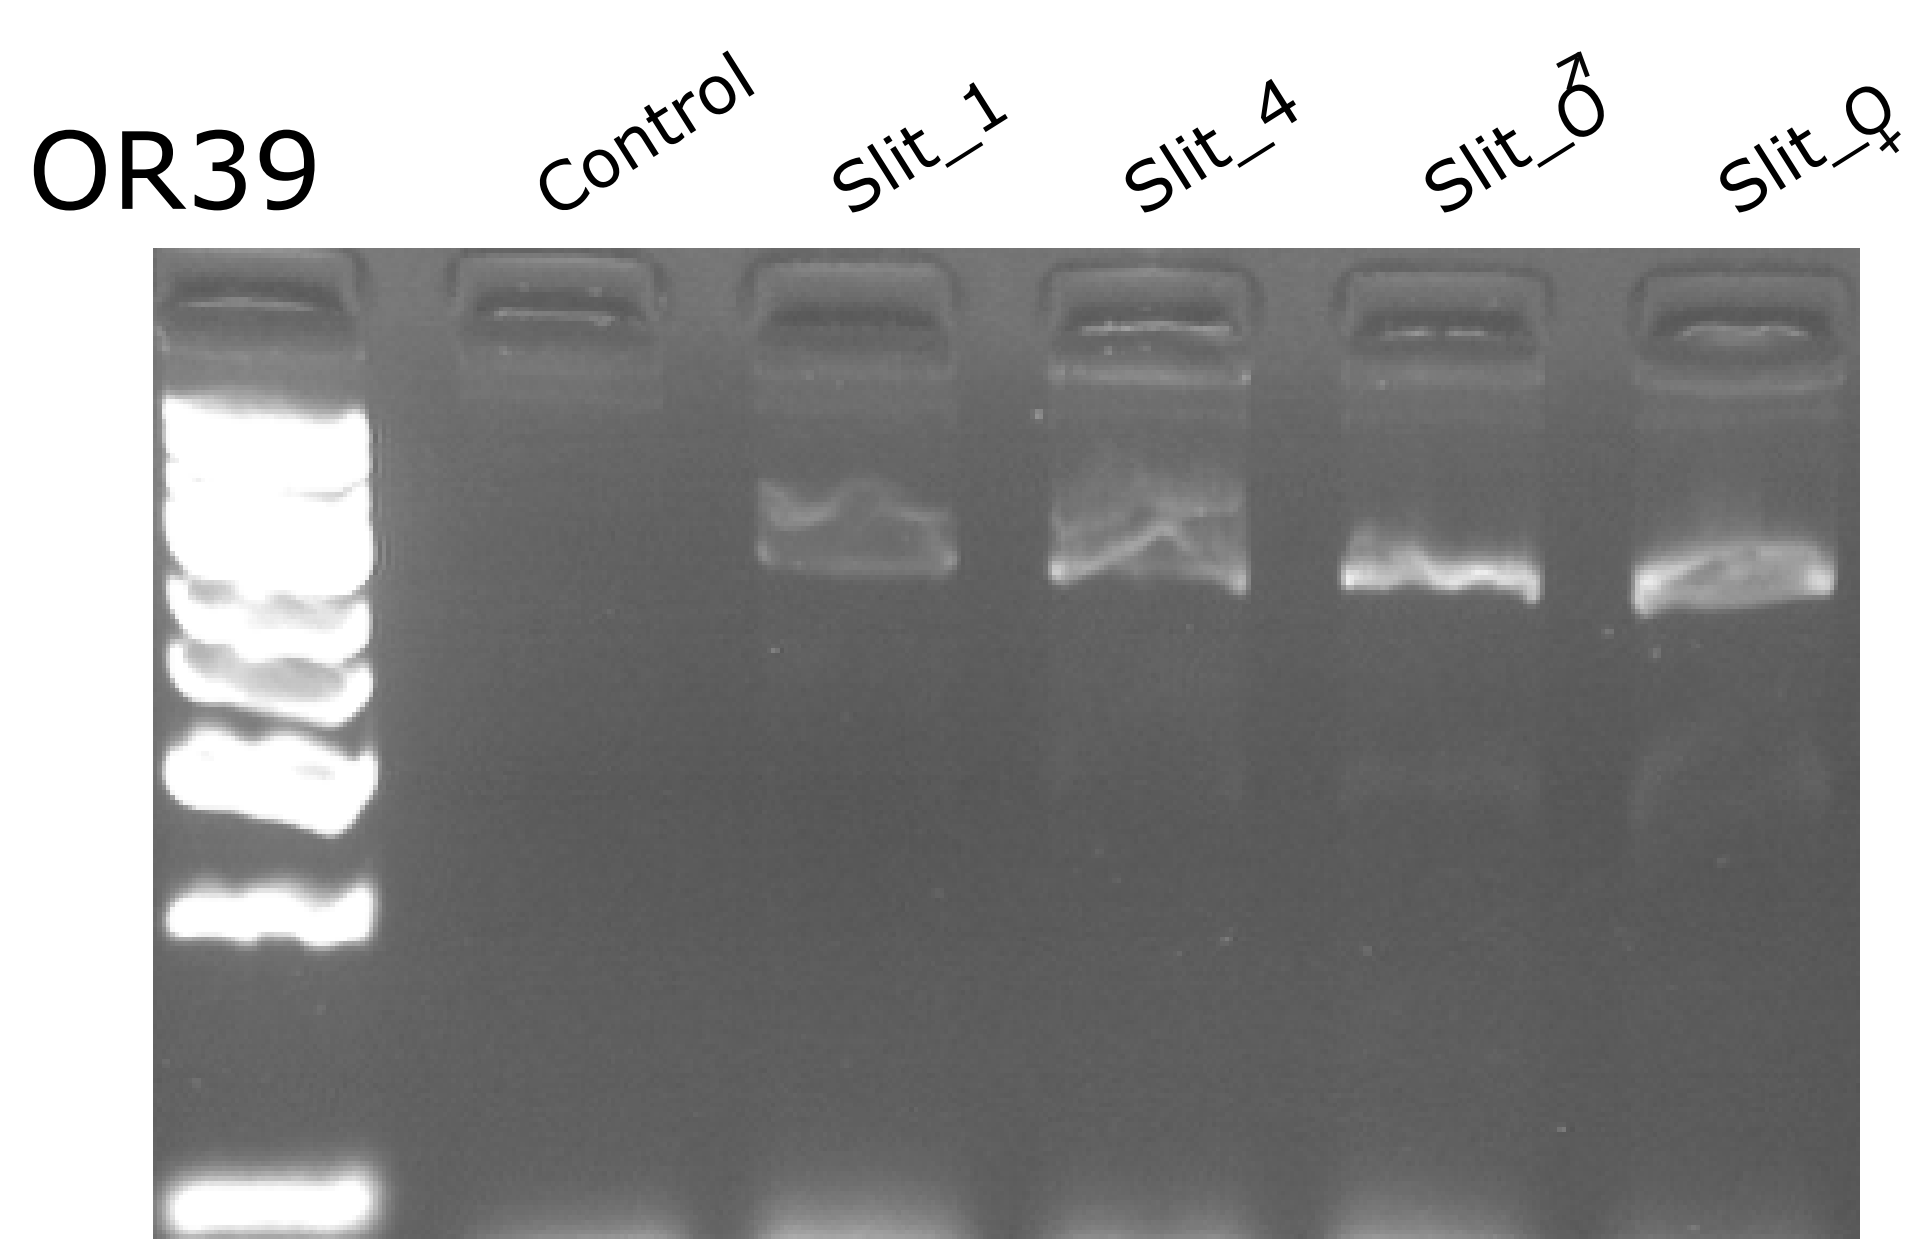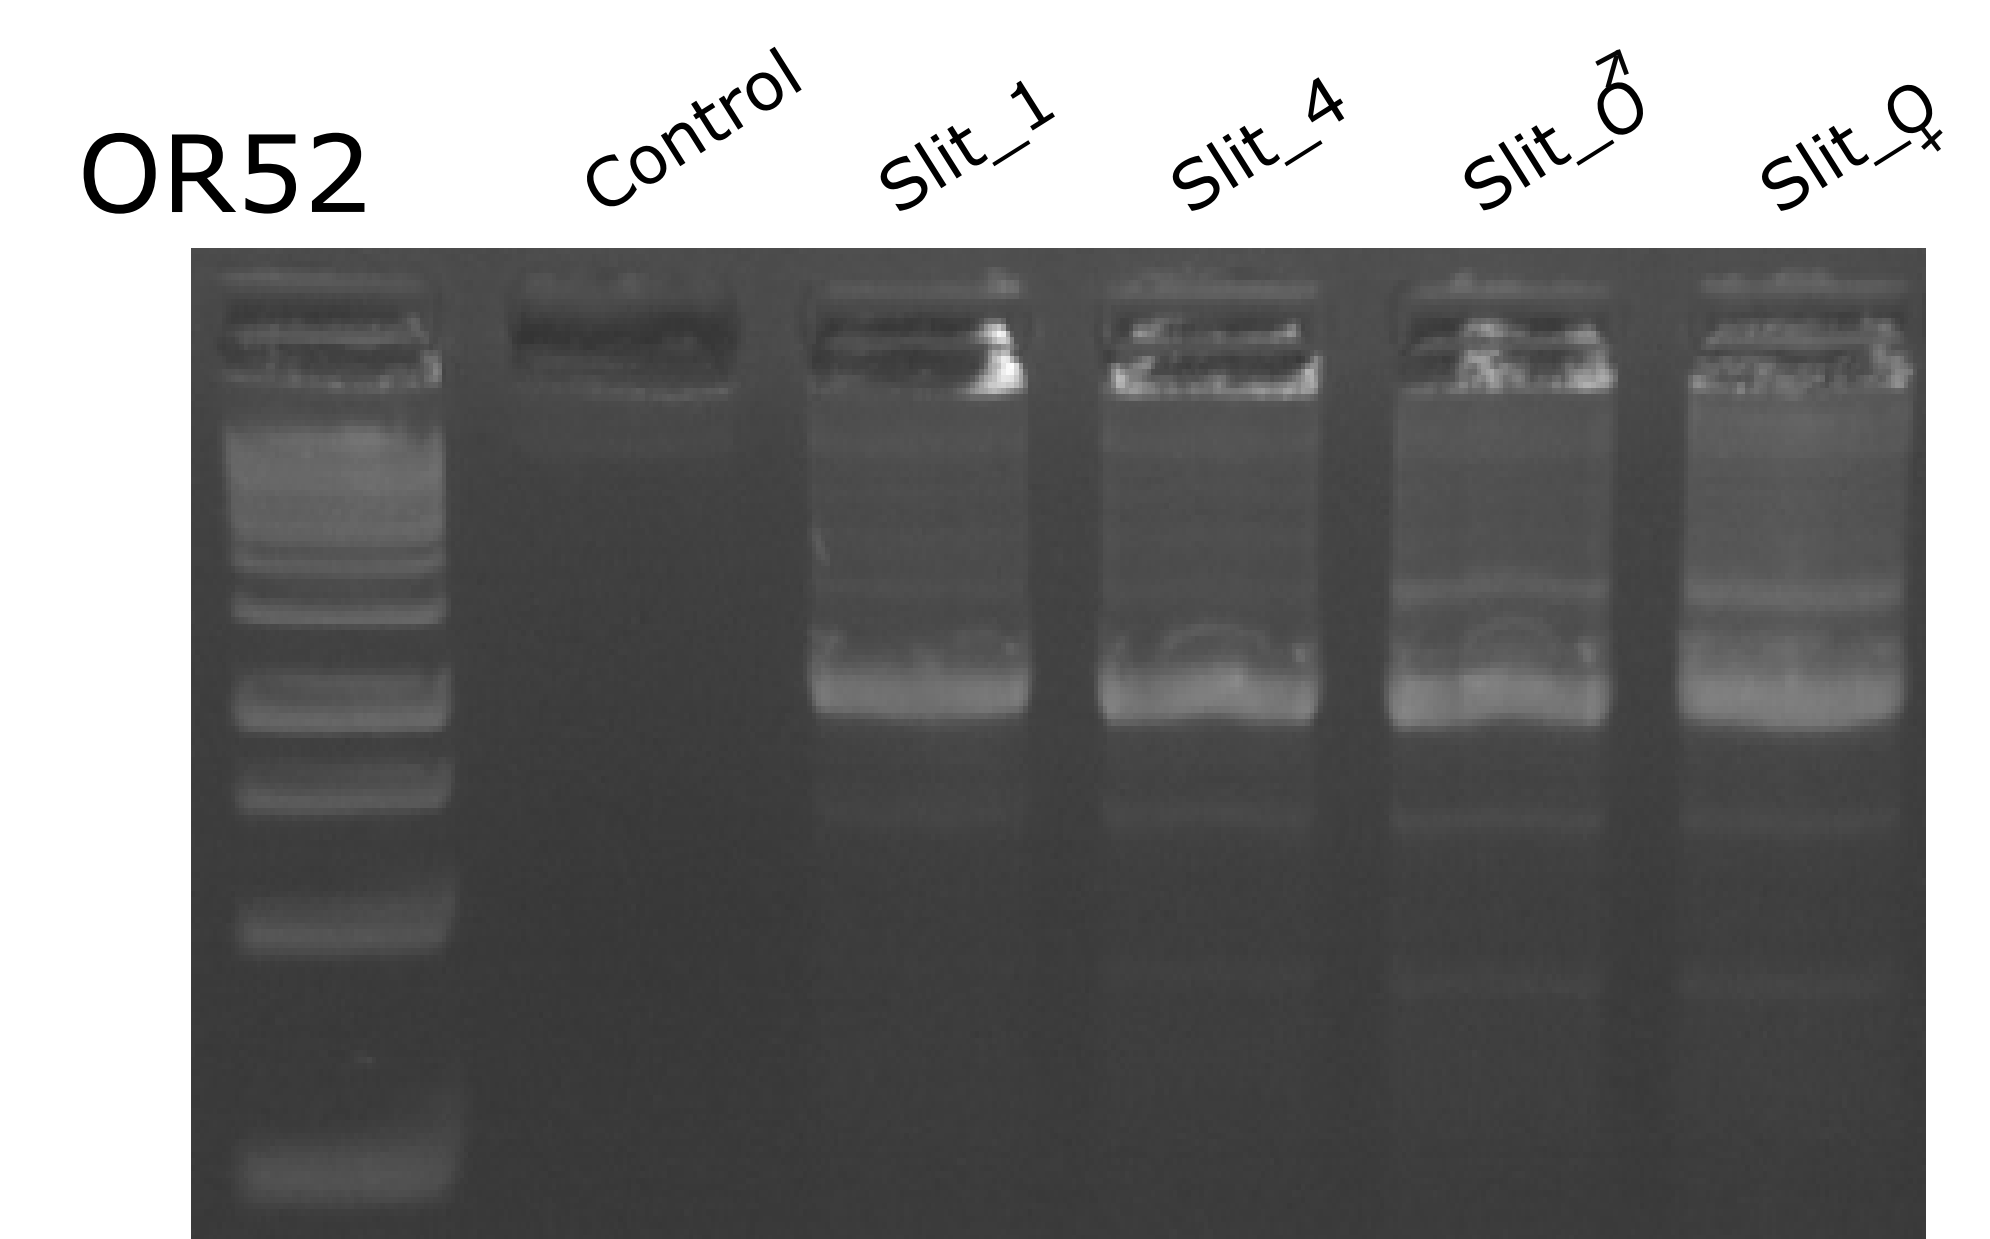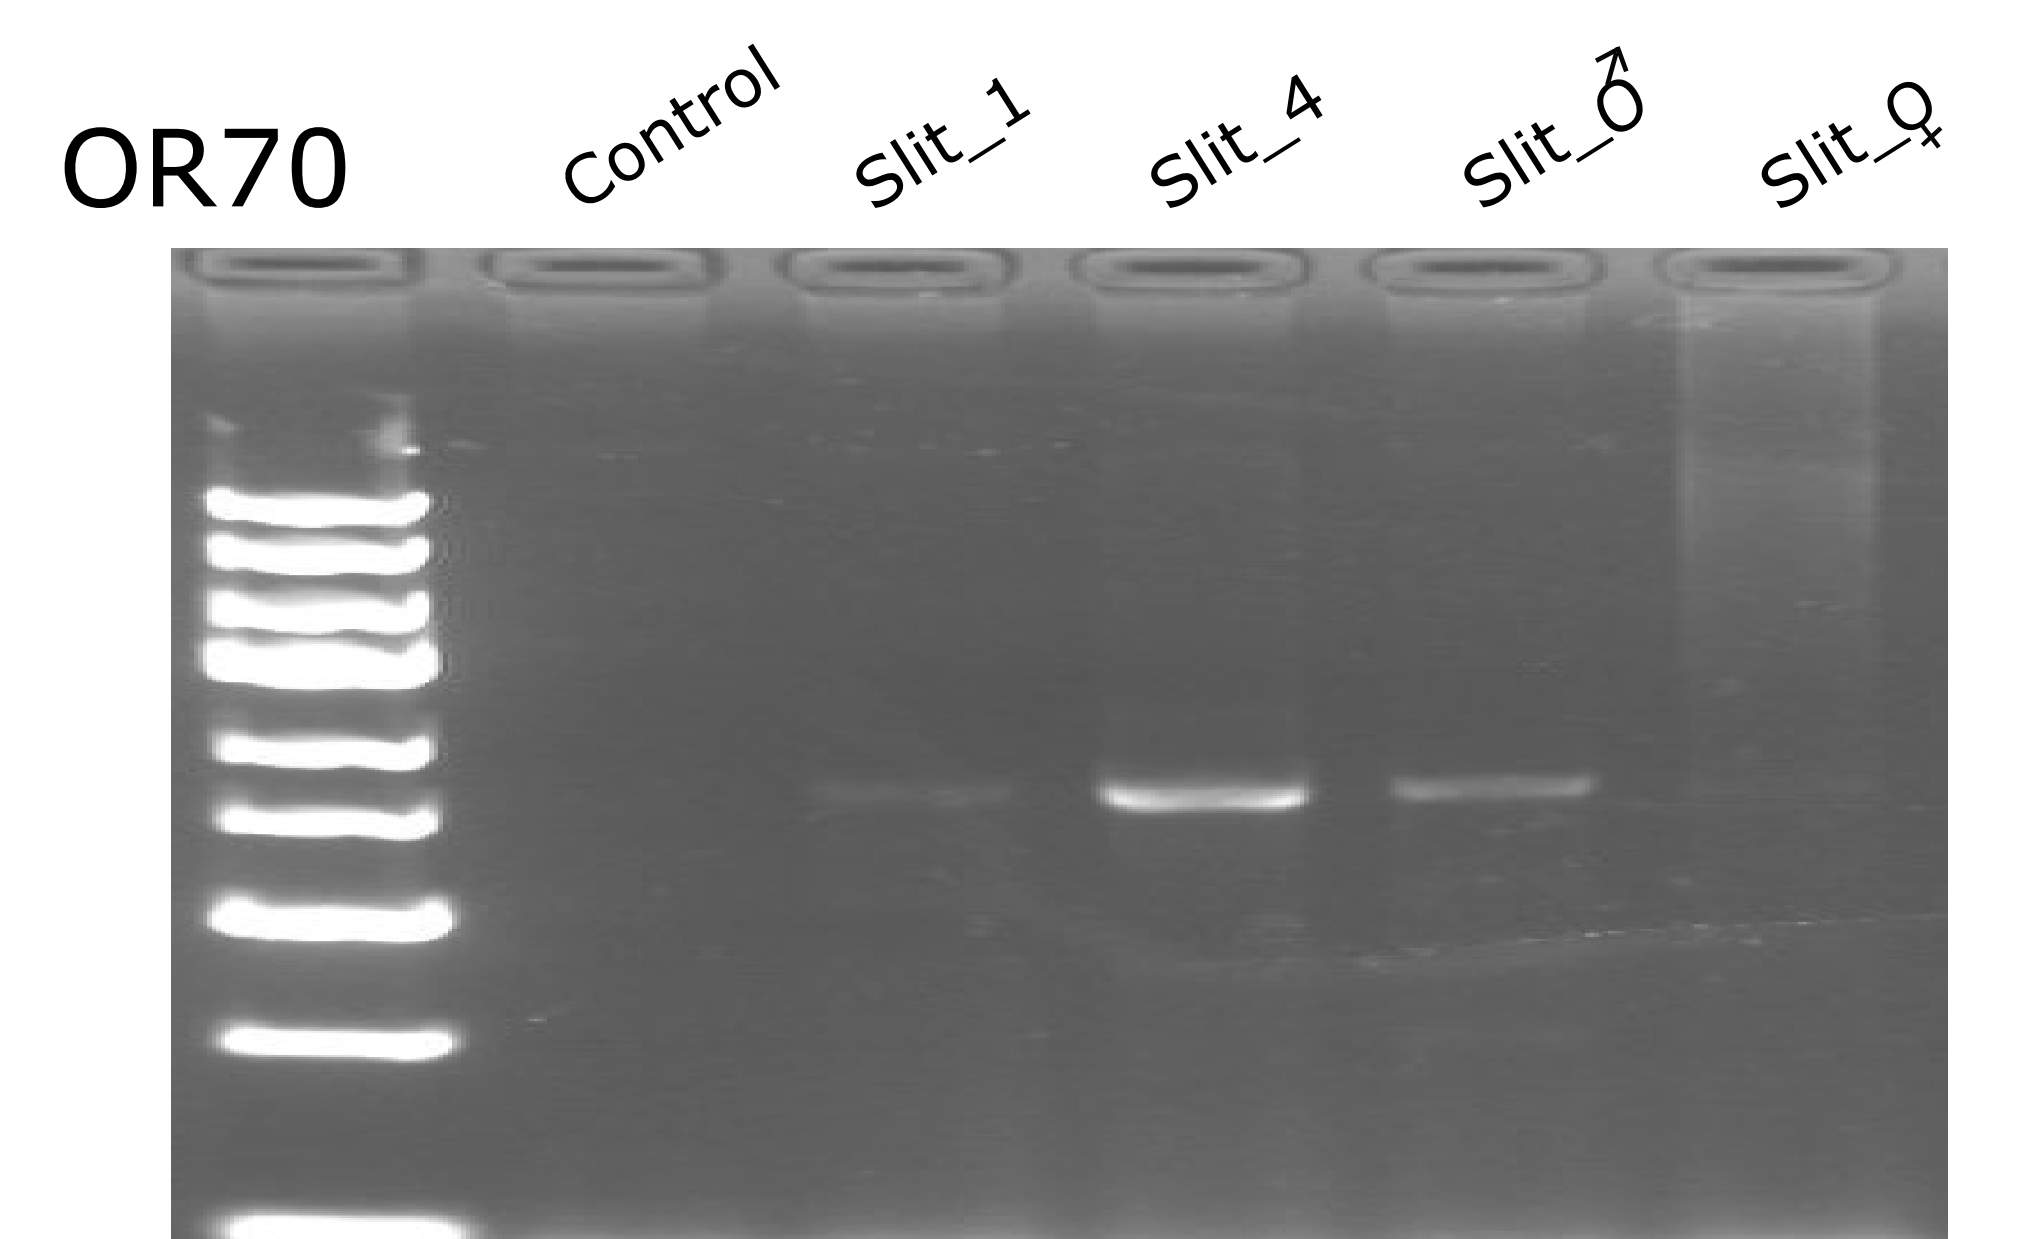

Supplement: 12915_2021_1159_MOESM4_ESM.pdf [file 12915_2021_1159_MOESM4_ESM.pdf]
