# Supplementary material for: Stage-specific expression of an odorant receptor underlies olfactory behavioral plasticity in Spodoptera littoralis larvae
Source: PubMed Central journal article supplement (PMC8555055; doi:10.1186/s12915-021-01159-1), 2021-10-28
Supplement: 12915_2021_1159_MOESM1_ESM.pdf [file 12915_2021_1159_MOESM1_ESM.pdf]

|                                     |                                                                                                |
|-------------------------------------|------------------------------------------------------------------------------------------------|
|                                     | Assembled transcripts from <i>S. littoralis</i> larvae<br>(First and fourth instar) and adults |
| Complete BUSCOs (C)                 | 1598 (96.4 %)                                                                                  |
| Complete and Single-Copy BUSCOs (S) | 1245 (75.1 %)                                                                                  |
| Complete and duplicate BUSCOs (D)   | 353 (21.3 %)                                                                                   |
| Fragmented BUSCOs (F)               | 47 (2.8 %)                                                                                     |
| Missing BUSCOs (M)                  | 13 (0.8 %)                                                                                     |
| Total BUSCO groups searched         | 1658                                                                                           |
