# Supplementary material for: Stage-specific expression of an odorant receptor underlies olfactory behavioral plasticity in Spodoptera littoralis larvae
Source: PubMed Central journal article supplement (PMC8555055; doi:10.1186/s12915-021-01159-1), 2021-10-28
Supplement: 12915_2021_1159_MOESM2_ESM.pdf [file 12915_2021_1159_MOESM2_ESM.pdf]

| Annotation | 1st Instar (FPKM) | 4th Instar (FPKM) | Annotation | 1st Instar (FPKM) | 4th Instar (FPKM) | Annotation | 1st Instar (FPKM) | 4th Instar (FPKM) |
|------------|-------------------|-------------------|------------|-------------------|-------------------|------------|-------------------|-------------------|
| SlitOR1    | <b>0.19</b>       | <b>0.00</b> *     | SlitOR21   | 0.00              | 0.00              | SlitOR41   | 0.00              | 0.00              |
| SlitORco   | <b>4.99</b>       | <b>0.34</b>       | SlitOR22   | <b>0.00</b> *     | <b>0.00</b> *     | SlitOR42   | 0.00              | 0.00              |
| SlitOR3    | 0.00              | 0.00              | SlitOR23   | 0.00              | 0.00              | SlitOR43   | <b>0.00</b> *     | <b>0.00</b> *     |
| SlitOR4    | 0.00              | <b>0.13</b>       | SlitOR24   | <b>0.00</b> *     | <b>0.00</b> *     | SlitOR44   | <b>0.24</b>       | <b>0.00</b> *     |
| SlitOR5    | 0.09 #            | 0.00              | SlitOR25   | <b>0.97</b>       | <b>0.23</b>       | SlitOR45   | <b>0.79</b>       | <b>0.50</b>       |
| SlitOR6    | 0.00              | 0.00              | SlitOR26   | 0.11 #            | 0.00              | SlitOR46   | 0.67 #            | 2.68 #            |
| SlitOR7    | <b>0.00</b> *     | <b>0.00</b> *     | SlitOR27   | <b>0.22</b>       | <b>0.06</b>       | SlitOR47   | <b>0.33</b>       | <b>0.31</b>       |
| SlitOR8    | <b>0.00</b> *     | <b>0.00</b> *     | SlitOR28   | <b>0.55</b>       | <b>0.05</b>       | SlitOR48   | 0.00              | 0.00              |
| SlitOR9    | <b>0.70</b>       | <b>0.17</b>       | SlitOR29   | <b>0.05</b>       | <b>0.11</b>       | SlitOR49   | 0.00              | 0.00              |
| SlitOR10   | 2.85 #            | 2.98 #            | SlitOR30   | 0.04 #            | 0.00              | SlitOR50   | 0.00              | 0.00              |
| SlitOR11   | 0.00              | 0.00              | SlitOR31   | 6.79 #            | 8.26 #            | SlitOR51   | 0.11 #            | 0.00              |
| SlitOR12   | <b>0.00</b> *     | <b>0.00</b> *     | SlitOR32   | <b>0.10</b>       | <b>0.00</b> *     | SlitOR52   | <b>0.64</b>       | <b>0.00</b> *     |
| SlitOR13   | 0.00              | 0.00              | SlitOR33   | 0.00              | 0.00              | SlitOR53   | 0.00              | 0.00              |
| SlitOR14   | <b>10.59</b>      | <b>11.78</b>      | SlitOR34   | <b>0.04</b>       | <b>0.00</b> *     | SlitOR54   | <b>0.29</b>       | <b>0.00</b> *     |
| SlitOR15   | <b>0.23</b>       | <b>0.00</b> *     | SlitOR35   | 0.00              | 0.00              | SlitOR55   | <b>0.14</b>       | <b>0.07</b>       |
| SlitOR16   | <b>0.69</b>       | <b>0.48</b>       | SlitOR36   | <b>0.05</b>       | <b>0.00</b> *     | SlitOR56   | <b>0.00</b> *     | <b>0.00</b> *     |
| SlitOR17   | 0.11 #            | 0.00              | SlitOR37   | 1.19 #            | 0.11 #            | SlitOR57   | 0.00              | 0.00              |
| SlitOR18   | <b>0.00</b> *     | <b>0.00</b> *     | SlitOR38   | <b>0.00</b> *     | <b>0.00</b> *     | SlitOR58   | 0.77 #            | 0.09 #            |
| SlitOR19   | <b>1.12</b>       | <b>0.00</b> *     | SlitOR39   | <b>0.15</b>       | <b>0.00</b> *     | SlitOR59   | <b>0.05</b>       | <b>0.00</b> *     |
| SlitOR20   | <b>0.00</b> *     | <b>0.05</b>       | SlitOR40   | <b>0.19</b>       | 0.00              | SlitOR60   | <b>1.44</b>       | <b>0.00</b> *     |
|            |                   |                   |            |                   |                   | SlitOR70   | <b>0.00</b> *     | <b>0.00</b> *     |

# Indicates false positive; \* Indicates false negative; ORs in bold were confirmed by RT-PCR to be expressed in larvae.
