# Supplementary material for: Stage-specific expression of an odorant receptor underlies olfactory behavioral plasticity in Spodoptera littoralis larvae
Source: PubMed Central journal article supplement (PMC8555055; doi:10.1186/s12915-021-01159-1), 2021-10-28
Supplement: 12915_2021_1159_MOESM3_ESM.pdf [file 12915_2021_1159_MOESM3_ESM.pdf]

## Newly identified *SlitOR70* amino acid sequence

>SlitOR70

MEVLKDFPEDFAKALKTSFEMLNFNVRYLNEEQPFLKKYWRYSYIFATIFIHGFSMSIHMPELLT  
GDEMTQFAYLIPSILVTIHAIFKSIVLIPMTRQISTFISELGSLWRVKFTEKQFEDKDAVLWRLDFI  
NRASYWVTLSGSAQYLLSPLFETLFRRFILKQDCKLLLPFASVFPLDHTKNWLFYLLVYIFQLYSMF  
LLVSMYTGAALIMISSCALLGAEFLMLKDDLRSVIPRNNNEIHNSDNTNEGDNNDNELTIEEFVK  
RHQMLLGLSRQLDNVFNGMVFIDLLFVGIT
