# Supplementary material for: Stage-specific expression of an odorant receptor underlies olfactory behavioral plasticity in Spodoptera littoralis larvae
Source: PubMed Central journal article supplement (PMC8555055; doi:10.1186/s12915-021-01159-1), 2021-10-28

A

Line WT, cDNA ATGGAAAGAGCTGCCTGAAATTTCAAAGAATTC**CGAACCGATATTACCATGTC**TGGTTTATTGAGAAATGCCCATATTTTGATTATGCACATGGAAAACCTTTTTGG  
 601 bp AATGAAAAATGTCATTTGACCTTAAACATAGTTTCAGTTGTAACCTATCTATTTCTTTGACTATGTATATGGGAAAAGTATT**TAGAGGAGAATTACAACCTTAGGAGTTGGCTT**  
 exon1 \* exon2: ATGTTATCAGCGTTTATGTCGTCAGTGACAAG \* GTAAGCTAATTTTTTTAAACTTTATTTCTTAAAATAGTGTATTGTTGAACAAACCATAACGGATTTTATTCTATTTGAC  
 AAAGCCAAAAATATTACTCTATCCTCTGCATTACTATTCAAACATCACGTCGACCTCGTTCTCAGGTCACAAAACCTCCAAATATACCAGAACATCCCAATTTCCCGTACATTTT  
 TCCTGCATATAATTTTCTCTAAATTCAAAGAACAAAAGACGTTTTCGCCAACGTTTTATATCAACACCTTGCATACGGAAACATGCTGTATACTCTTAACTGAACCTGAAAT  
 TCTCAGCCATCCTCAAAGGTTTCGGTTGTCGTCCTTTACAAGAAGGAAATAAGGGCTATAATCCT**GCAGCTGGGAGGTATGTGGAGG**ATGGAAACATCTAACTGAAATACAGA  
 TTAACAAGAAGAAT**ACGTTACTGAGGAGACTAAAGT**TCTGTTATGCAGTTTCTACTGGATTAATATGATTGGATCCTGGCAATACATACTGGCTCCTTTATTGGAACAGTTA  
 CCCGAAATTTATTTACTGCAGGAATGTGGGCTGTACTTCCATTTCTTGCAGCTTTCCTTTGATCCTACTGGGAACTGGGCAAGATATATCGGTGTATATATTTTGGAA  
 CTTACAGCA

B

|                          | exon1 mutation                                       | coding region indels | exon2 mutation                                             |
|--------------------------|------------------------------------------------------|----------------------|------------------------------------------------------------|
| Line WT, $\Delta$ (NA):  | GGGAAAAGTATT <b>TAGAGGAGAATTACAACCTTAGGAGTTGGCTT</b> | NA                   | GGGCTATAATCCT <b>GCAGCTGGGAGGTATGTGGAGG</b> ATGGAAACATCTAA |
| Line 38, $\Delta$ (420): | GGGAAAAGTATT <b>TAGAGGAGAATTACAA</b> .....           | - 440 bp + 20 bp     | ..... <b>GGATTATTGGAGAATTATT</b> TGGAGGATGGAACATCTAA       |
| Line 10, $\Delta$ (445): | GGGAAAAGTATT <b>TAGAGGAGAATTAC</b> .....             | - 445 bp             | .....AGGATGGAACATCTAA                                      |
| Line 2, $\Delta$ (441):  | GGGAAAAGTATT <b>TAGAGGAGAA</b> .....                 | - 446 bp + 5 bp      | ..... <b>GTATT</b> TGGAGGATGGAACATCTAA                     |

C

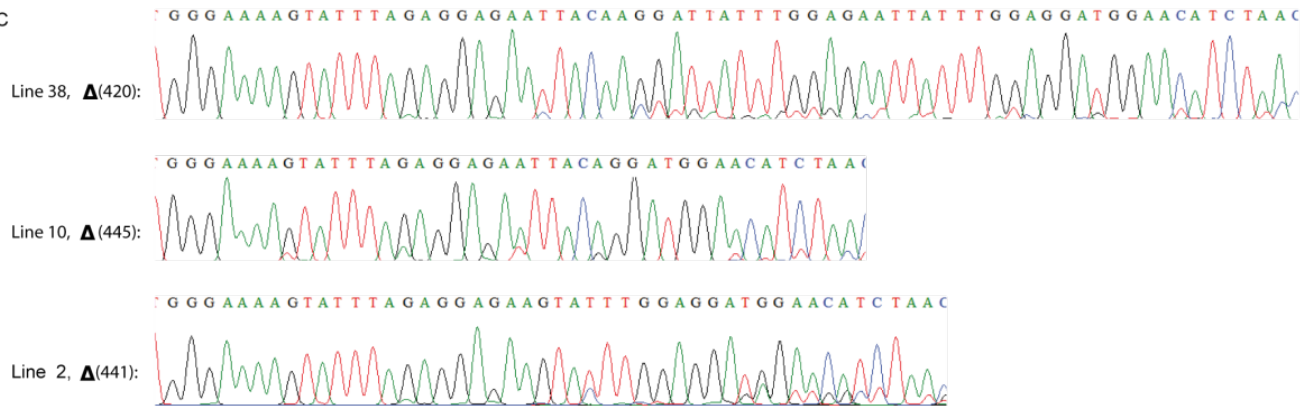

Supplement: 12915_2021_1159_MOESM6_ESM.pdf [file 12915_2021_1159_MOESM6_ESM.pdf]
