# Supplementary material for: Stage-specific expression of an odorant receptor underlies olfactory behavioral plasticity in Spodoptera littoralis larvae
Source: PubMed Central journal article supplement (PMC8555055; doi:10.1186/s12915-021-01159-1), 2021-10-28
Supplement: 12915_2021_1159_MOESM10_ESM.pdf [file 12915_2021_1159_MOESM10_ESM.pdf]

| Annotation | Forward primer                | Temperature | Reverse primer                | Temperature |
|------------|-------------------------------|-------------|-------------------------------|-------------|
| ORCo       | TACGACGGCTCCGAGGAA            | 58.2        | TTACTTCAGCTGTACCAACACCAT      | 59.3        |
| SlitOR1    | ATGGACTCGAATGTAGATAAGA        | 54.7        | TTACTTTTCATTGACATTAAGTAGAAGAG | 58.2        |
| SlitOR3    | ATGGATGAAGCTTTTCTCGCG         | 57.9        | AAACGGACATCACGAGTGAAAGA       | 59.3        |
| SlitOR4    |                               | 57.9        | ATAGACTGCATAGTGCTCGCG         | 59.8        |
| SlitOR5    | TGACGAACCAAAGGACTTGG          | 57.9        | TGTTGAAACAAGTCAGTTAGGGCA      | 59.3        |
| SlitOR6    | ATGGGTTTAAAAAGTTTCTTTTTG      | 57.9        | TCAAATGCTGCGTAGGAAGGT         | 53.1        |
| SlitOR7    | ATGCCCAAACCACTGTTATTTGAC      | 59.3        | TTATCTTCCGTACACAGTCTGCAG      | 61          |
| SlitOR8    | CTGATGCTCTGCCACTTCTAGTT       | 60.6        | GCAAAATGATTTGGTTTCCATAA       | 53.5        |
| SlitOR9    | AGATTATCGTGGTGATAGCGAGAC      | 61          | CGAAGTACGACCAGGCTGTAC         | 61.8        |
| SlitOR10   | ATGGAGGCAGAAAAACACG           | 55.9        | TTATTCTGTGTTCAACCTGTTCA       | 57.1        |
| SlitOR11   | TCGAGACCAACTTCAAGGGC          | 59.4        | GTACATCTCGCTGCCGATCA          | 59.4        |
| SlitOR12   | ATGGAAGAAGAACCTCTGTAA         | 54.7        | TTATGGAGGCGAACCATACAA         | 55.9        |
| SlitOR13   | ATCATGTGGGTGATCGACGG          | 59.4        | AGTTGATCACCAGGCTGTGG          | 59.4        |
| SlitOR14   | TAGGTCTGGGATGGTGGC            | 58.2        | TAAGCTGCCTTCATGATAGCTAGA      | 59.3        |
| SlitOR15   | CATTTGGCCCGGACTCAA            | 56          | TAGAGGAAACATCTTCAACCCTGA      | 59.3        |
| SlitOR16   | ATGTACATAAAAATAGTGCGGTCA      | 56.4        | TCACATGCTTCGTAAGAAGG          | 55.3        |
| SlitOR17   | ATGTCGGTGTGTGCCGG             | 57.6        | TTATTTAGTTTCCGCTAGAACTGCA     | 58.1        |
| SlitOR18   | ATGGAATGAAATCAGATATTCTGA      | 54.8        | TCAAGCNGTAATCAAAGTGAAGA       | 56.2        |
| SlitOR20   | AAATAACATTTGCGGTGTACGACT      | 57.6        | CGCCGTAAGTAGCAAGTGATAG        | 61          |
| SlitOR19   | AAGAATTTCTTAATCGGCTCCGG       | 59.3        | CAGTTGATCCGAGAGGGCAAT         | 59.8        |
| SlitOR21   | CCACGACAGGTCTGTGCTTA          | 59.4        | TCTTGAAGTGTGCTGACG            | 57.3        |
| SlitOR22   | GAAGGCATCCTTTGATTTGACAG       | 61          | GAATATGAAGAGCTCATGCACGAG      | 61          |
| SlitOR23   | CTGCACCACCAGAGCATGTA          | 59.4        | CAGAAGTAGCAGGGCACGAA          | 59.4        |
| SlitOR24   | ATGAGGTCTTAAGCCATGTGT         | 58.4        | TCATTCGTGGCTCATCGTTAGA        | 58.4        |
| SlitOR25   | AGCTTTCTGTTCTGGCGTA           | 57.3        | ATGATGGTAGACCGCACTCC          | 59.4        |
| SlitOR26   | ATGTCTCTGCTGCGGGC             | 58.2        | GGCGCAGTACTGCGTAGA            | 58.2        |
| SlitOR27   | GAAAACCAAATTGGCGTTTCTGTC      | 59.3        | TCCGCATTACGGCAAAGG            | 56          |
| SlitOR28   | ATGACGTCTCTTATAGAAAATTTTCTTC  | 58.6        | TTAATTAACACTTTTCTTTGAAGAAGTT  | 57.2        |
| SlitOR29   | GAGCTTAGAAGATCCAGCGCG         | 61.8        | TGAAGGTCGGCAGAGTAAGGT         | 59.8        |
| SlitOR30   | CGATTAAACCGATCACATCCGTCT      | 61          | AGCTCAGGATCGCGTAGGATT         | 59.8        |
| SlitOR31   | ATGGAAGATAATGTAGCATACTCTACCTT | 61          | CTAGCGATTCAAGAACGTAAACAATGTG  | 62.2        |
| SlitOR32   | ATGGTCTCCTCAGAAGACCTTTTT      | 59.3        | GCAACAAAAGTTTGTGCGGAC         | 57.9        |
| SlitOR33   | CACCATGTTTCATCACCAGCG         | 59.4        | CAGGGTCTTGACACCACGG           | 61.4        |
| SlitOR34   | TTCCTATGCTGCTGTCCAGATTTT      | 61          | CGAGAATGTCAAGTGTCAAAGGC       | 62.7        |
| SlitOR35   | TGGTTCGTGTTCTGTGAGGAG         | 59.4        | CGATCTCGTAGTTGGGGCTC          | 61.4        |
| SlitOR36   | AGTTTGGTTTGGAGTACTGTGACC      | 61          | GGAATAATGCCTCTGAAGACGGA       | 61          |
| SlitOR37   | AAGCATTTGCGTAATACCTGTGCT      | 59.3        | AAGCATTTGCGTAATACCTGTGCT      | 59.3        |
| SlitOR38   | ATGGCTGACCAATTCGAGAAACT       | 59.3        | AGATAGTGTAGGCCTGCTGAAACA      | 61          |
| SlitOR39   | GGTTTGGAGTATTGTGAGCTACCG      | 62.7        | GCTGTCAGGGTCATAGTCTTCTGT      | 62.7        |
| SlitOR40   | TGCAGGAATGGCAGATTCAGT         | 57.9        | CGACCAAGTTGTGCTCAGTAC         | 59.8        |

| Annotation                                                                                                  | Forward primer                | Temperature | Reverse primer                | Temperature |
|-------------------------------------------------------------------------------------------------------------|-------------------------------|-------------|-------------------------------|-------------|
| SlitOR41                                                                                                    | ACCACCTTCCACGAGACCTA          | 59.4        | CAGGTCCACGAACTGGAACA          | 59.4        |
| SlitOR42                                                                                                    | GCCAAGAAGGACGACACCAT          | 59.4        | TGCTCAGGTAGAACACGTCG          | 59.4        |
| SlitOR43                                                                                                    | ATGGTGCTCTCCGACTAGAA          | 59.8        | TCGTTGAGAACTGCGAAGATGGAA      | 61          |
| SlitOR44                                                                                                    | GCGACCAATCAGTCAGC             | 58.2        | TACGAAGCTTTGATGATTGCCATG      | 59.3        |
| SlitOR45                                                                                                    | ATGTCGGACAAATGTTTCGATTGGA     | 59.3        | CTGGCCCGTAAGATCGCAATA         | 59.8        |
| SlitOR46                                                                                                    | TGGCAACAATAGTGTGTGGTTTGT      | 59.3        | GGTGGAACTTCTGGCAGC            | 58.2        |
| SlitOR47                                                                                                    | ACAATAGAACAAGCGAAACGGGAA      | 59.3        | GAAGTACGAGTACGACCTCGT         | 59.8        |
| SlitOR48                                                                                                    | ACAACACCGCCTACATCTGG          | 59.4        | TCAGCAGCATCTCTTGGTG           | 59.4        |
| SlitOR49                                                                                                    | GAAGGGCGAGTTCTTCGTGT          | 59.4        | GTGGCCTCGTAGAACACCTT          | 59.4        |
| SlitOR50                                                                                                    | CACCGTGTTCCTGTTGAGA           | 59.4        | TGATGCTGGGCCACTTGTAG          | 59.4        |
| SlitOR51                                                                                                    | GATGTTCAAAAATATTCTCCAGAAATTGG | 59.6        | TTCATTTGAGACTGACTCAGCAGC      | 61          |
| SlitOR52                                                                                                    | TATGGAAAATATCCCCATACAAAGATT   | 59.6        | TTTGCACAAACGTGGGAAGTCAGA      | 61          |
| SlitOR53                                                                                                    | GGACAGGATCAAGGAGTGCC          | 61.4        | TGTACTGGAACACCCACAGC          | 59.4        |
| SlitOR54                                                                                                    | ATGGGACCTCTATACAGTATCCAGGTG   | 65          | TGCCACTACAGCCAAGGTTTCG        | 61.8        |
| SlitOR55                                                                                                    | ATGATGGAGACGCTCCGAAGG         | 61.8        | GCCAACTCCTAGAATAACAAATTCTAAAG | 61          |
| SlitOR56                                                                                                    | GATGGGTTAAGAAACTTTCTTTTGGAAA  | 59.9        | AATGTGAAGTAAGACAATGAAGTTCTCA  | 59.3        |
| SlitOR57                                                                                                    | GGTGACCGACGAGAACAAGA          | 59.4        | CTGGTCCAGTCGCAGTTGTA          | 59.4        |
| SlitOR58                                                                                                    | ATGCGAGGGATGGAATGTTTG         | 57.9        | TTCTTTCTTTCCCAACACAGCGTA      | 59.3        |
| SlitOR59                                                                                                    | GAGTCTTCAGTGACGATAGCGTC       | 62.7        | TGGAATGCCTTCACAGAGCCT         | 59.8        |
| SlitOR60                                                                                                    | AAATGTCCGAACAACAATAACGCCGT    | 61.9        | GTTTCGTAAGTGAAGACCGCAAACA     | 61          |
| SlitOR70                                                                                                    | ATGGAGGTTCTTAAAGACTTCCCCGAA   | 63.4        | GAGAGAGCCAAGCTCTGATATAAATGT   | 61.9        |
| >gi 600074 emb Z46873.1  Spodoptera littoralis mRNA for partial beta-actin                                  | GTACGTCGCCATCCAGGC            | 60.5        | CGTGGGGCAGAGCGTAAC            | 60.5        |
| >gi 288226776 gb FJ979921.1  Spodoptera littoralis 60S ribosomal protein L13a mRNA, complete cds            | CAAGTCAGTCAAGCTTATGGCCTA      | 61          | CATAGGATTGGATCACTGCGG         | 59.8        |
| >gi 805487969 gb KP682697.1  Spodoptera littoralis voucher SPCAM0144 elongation factor 1a gene, partial cds | GCTGGTACTCCAAGAACAAC          | 59.8        | ACTTGCAGGCAATGTGGG            | 56          |
| SlitOR40 (qPCR)                                                                                             | TGCAGGAATGGCAGATTCAGT         | 57.9        | CGACCAAGTTGTGCTCAGTAC         | 59.8        |
| SlitORCo (qPCR)                                                                                             | TACGACGGCTCCGAGGAA            | 58.2        | TTACTTCAGCTGTACCAACACCAT      | 59.3        |
| SlitOR40 (Genotyping)                                                                                       | TCGAACCGATATTACCATGTCTG       | 58.9        | ACTTTAGTCTCTCAGTAACGT         | 56.5        |
