# Supplementary material for: Stage-specific expression of an odorant receptor underlies olfactory behavioral plasticity in Spodoptera littoralis larvae
Source: PubMed Central journal article supplement (PMC8555055; doi:10.1186/s12915-021-01159-1), 2021-10-28
Supplement: 12915_2021_1159_MOESM11_ESM.pdf [file 12915_2021_1159_MOESM11_ESM.pdf]

|    | <b>Compounds</b>      | <b>CAS No.</b> |    | <b>Compounds</b>         | <b>CAS No.</b> |
|----|-----------------------|----------------|----|--------------------------|----------------|
| 1  | Isoamyl acetate       | 123-92-2       | 28 | Ethyl butyrate           | 105-54-4       |
| 2  | Geraniol              | 106-24-1       | 29 | Ethyl hexanoate          | 123-66-0       |
| 3  | 1-heptanol            | 111-70-6       | 30 | Ethyl lactate            | 687-47-8       |
| 4  | 1-hexanol             | 111-27-3       | 31 | Ethyl-3-hydroxy butyrate | 5405-41-4      |
| 5  | 1-indanone            | 83-33-0        | 32 | Eugenol                  | 97-53-0        |
| 6  | 1-nonanol             | 143-08-8       | 33 | Farnesol acetate         | 4128-17-0      |
| 7  | 1-octanol             | 111-87-5       | 34 | Geranyl acetate          | 105-87-3       |
| 8  | 1-octen-3-ol          | 3391-86-4      | 35 | Guaiacol                 | 90-05-01       |
| 9  | 2-heptanone           | 110-43-0       | 36 | Hexyl acetate            | 142-92-7       |
| 10 | 2-pentanol            | 6032-29-7      | 37 | Alpha-humulene           | 6753-98-6      |
| 11 | 2-Phenyl ethanol      | 60-12-08       | 38 | Isobutyl acetate         | 110-19-0       |
| 12 | 2,3-butendiol         | 513-85-9       | 39 | Jasmonone                | 137-03-1       |
| 13 | 3-methyl-2-buten-1-ol | 556-82-1       | 40 | Linalool                 | 126-91-0       |
| 14 | 3-octanol             | 589-98-0       | 41 | m-cresol                 | 108-39-4       |
| 15 | Acetoin               | 513-86-0       | 42 | Methyl benzoate          | 93-58-3        |
| 16 | Benzaldehyde          | 100-52-7       | 43 | Methyl hexanoate         | 106-70-7       |
| 17 | Benzyl alcohol        | 100-51-6       | 44 | Methyl salicylate        | 119-36-8       |
| 18 | Butyl acetate         | 123-86-4       | 45 | Myrcene                  | 123-35-3       |
| 19 | Carvacrol             | 499-75-2       | 46 | Ocimene                  | 13877-91-3     |
| 20 | Beta-caryophyllene    | 87-44-5        | 47 | p-cresol                 | 106-44-5       |
| 21 | Citronellol           | 106-22-9       | 48 | Pentyl acetate           | 628-63-7       |
| 22 | DMNT                  | 19945-61-0     | 49 | Sulcatone                | 110-93-0       |
| 23 | E2-hexenal            | 6728-26-3      | 50 | Alpha-Terpeniol          | 10482-56-1     |
| 24 | E2-hexenol            | 928-95-0       | 51 | Thymol                   | 89-83-8        |
| 25 | E3-hexenol            | 928-97-2       | 52 | Z2-hexanol               | 928-94-9       |
| 26 | Estragole             | 140-67-0       | 53 | Z3-hexanol               | 928-96-1       |
| 27 | Ethyl benzoate        | 93-89-0        | 54 | Z3-hexenyl acetate       | 3681-71-8      |
